# Supplementary material
Source: PubMed Central journal article supplement (PMC3804560)
Supplement: NIHMS510576-supplement-1_si_001.pdf [file NIHMS510576-supplement-1_si_001.pdf]

# **TagDock: An efficient rigid body docking algorithm for oligomeric protein complex model construction and experiment planning**

**Jarrold A. Smith, Sarah J. Edwards, Christopher W. Moth, and Terry P. Lybrand**

**Supporting Information**

## Restraint Sets

Restraint sets used in TagDock processing of ZDOCK database.

A corresponds to M1, B to M2. Residue numberings are consistent with pdb.

The first two residues from A were chosen heuristically, the next two by DDM.

### 1A2K

|   |     |    |   |     |    |       |     |
|---|-----|----|---|-----|----|-------|-----|
| A | 32  | CA | B | 7   | CA | 50.15 | 1.0 |
| A | 32  | CA | B | 57  | CA | 51.8  | 1.0 |
| A | 32  | CA | B | 227 | CA | 42.26 | 1.0 |
| A | 110 | CA | B | 7   | CA | 23.96 | 1.0 |
| A | 110 | CA | B | 57  | CA | 39.03 | 1.0 |
| A | 110 | CA | B | 227 | CA | 33.12 | 1.0 |
| A | 203 | CA | B | 7   | CA | 51    | 1.0 |
| A | 203 | CA | B | 57  | CA | 68.81 | 1.0 |
| A | 203 | CA | B | 227 | CA | 45.13 | 1.0 |
| A | 72  | CA | B | 7   | CA | 24.34 | 1.0 |
| A | 72  | CA | B | 57  | CA | 37.34 | 1.0 |
| A | 72  | CA | B | 227 | CA | 15.79 | 1.0 |

### 1ACB

|   |    |    |   |     |    |       |     |
|---|----|----|---|-----|----|-------|-----|
| A | 19 | CA | B | 166 | CA | 37.31 | 1.0 |
| A | 19 | CA | B | 244 | CA | 48.36 | 1.0 |
| A | 19 | CA | B | 157 | CA | 40.07 | 1.0 |
| A | 28 | CA | B | 166 | CA | 44.88 | 1.0 |
| A | 28 | CA | B | 244 | CA | 47.94 | 1.0 |
| A | 28 | CA | B | 157 | CA | 38.5  | 1.0 |
| A | 44 | CA | B | 157 | CA | 18.92 | 1.0 |
| A | 44 | CA | B | 166 | CA | 21.14 | 1.0 |
| A | 44 | CA | B | 244 | CA | 29.72 | 1.0 |
| A | 11 | CA | B | 157 | CA | 32.28 | 1.0 |
| A | 11 | CA | B | 166 | CA | 38.67 | 1.0 |
| A | 11 | CA | B | 244 | CA | 51.02 | 1.0 |

### 1AHW

|   |     |    |   |     |    |       |     |
|---|-----|----|---|-----|----|-------|-----|
| A | 65  | CA | B | 123 | CA | 76.03 | 1.0 |
| A | 65  | CA | B | 187 | CA | 87.17 | 1.0 |
| A | 65  | CA | B | 66  | CA | 37.32 | 1.0 |
| A | 78  | CA | B | 123 | CA | 83.68 | 1.0 |
| A | 78  | CA | B | 187 | CA | 97.39 | 1.0 |
| A | 78  | CA | B | 66  | CA | 62.61 | 1.0 |
| A | 211 | CA | B | 66  | CA | 36.19 | 1.0 |
| A | 211 | CA | B | 123 | CA | 75.5  | 1.0 |
| A | 211 | CA | B | 187 | CA | 82.48 | 1.0 |
| A | 149 | CA | B | 66  | CA | 17.43 | 1.0 |
| A | 149 | CA | B | 123 | CA | 64.18 | 1.0 |
| A | 149 | CA | B | 187 | CA | 73.09 | 1.0 |

### 1AK4

|   |     |    |   |     |    |       |     |
|---|-----|----|---|-----|----|-------|-----|
| A | 418 | CA | B | 31  | CA | 57.12 | 1.0 |
| A | 418 | CA | B | 40  | CA | 62.41 | 1.0 |
| A | 418 | CA | B | 144 | CA | 54.75 | 1.0 |
| A | 512 | CA | B | 31  | CA | 36.7  | 1.0 |
| A | 512 | CA | B | 40  | CA | 40.38 | 1.0 |
| A | 512 | CA | B | 144 | CA | 31.97 | 1.0 |

Restraint Sets

|   |     |    |   |     |    |       |     |
|---|-----|----|---|-----|----|-------|-----|
| A | 482 | CA | B | 31  | CA | 28.88 | 1.0 |
| A | 482 | CA | B | 40  | CA | 31.01 | 1.0 |
| A | 482 | CA | B | 144 | CA | 35.11 | 1.0 |
| A | 522 | CA | B | 31  | CA | 40.65 | 1.0 |
| A | 522 | CA | B | 40  | CA | 38.63 | 1.0 |
| A | 522 | CA | B | 144 | CA | 26.74 | 1.0 |

1AKJ

|   |     |    |   |     |    |       |     |
|---|-----|----|---|-----|----|-------|-----|
| A | 4   | CA | B | 51  | CA | 35.61 | 1.0 |
| A | 4   | CA | B | 148 | CA | 22.75 | 1.0 |
| A | 4   | CA | B | 194 | CA | 37    | 1.0 |
| A | 69  | CA | B | 51  | CA | 45.28 | 1.0 |
| A | 69  | CA | B | 148 | CA | 34.81 | 1.0 |
| A | 69  | CA | B | 194 | CA | 42.17 | 1.0 |
| A | 114 | CA | B | 51  | CA | 58.28 | 1.0 |
| A | 114 | CA | B | 148 | CA | 28.45 | 1.0 |
| A | 114 | CA | B | 194 | CA | 56.83 | 1.0 |
| A | 255 | CA | B | 51  | CA | 49.55 | 1.0 |
| A | 255 | CA | B | 148 | CA | 54.23 | 1.0 |
| A | 255 | CA | B | 194 | CA | 10.06 | 1.0 |

1ATN

|   |     |    |   |     |    |       |     |
|---|-----|----|---|-----|----|-------|-----|
| A | 54  | CA | B | 57  | CA | 23.96 | 1.0 |
| A | 54  | CA | B | 231 | CA | 48.44 | 1.0 |
| A | 54  | CA | B | 364 | CA | 55.76 | 1.0 |
| A | 157 | CA | B | 57  | CA | 28.45 | 1.0 |
| A | 157 | CA | B | 231 | CA | 68.17 | 1.0 |
| A | 157 | CA | B | 364 | CA | 55.32 | 1.0 |
| A | 228 | CA | B | 57  | CA | 44.26 | 1.0 |
| A | 228 | CA | B | 231 | CA | 71.56 | 1.0 |
| A | 228 | CA | B | 364 | CA | 77.67 | 1.0 |
| A | 75  | CA | B | 57  | CA | 20.4  | 1.0 |
| A | 75  | CA | B | 231 | CA | 41.78 | 1.0 |
| A | 75  | CA | B | 364 | CA | 58.78 | 1.0 |

1AVX

|   |     |    |   |     |    |       |     |
|---|-----|----|---|-----|----|-------|-----|
| A | 674 | CA | B | 170 | CA | 37.93 | 1.0 |
| A | 674 | CA | B | 236 | CA | 45.37 | 1.0 |
| A | 674 | CA | B | 82  | CA | 31.83 | 1.0 |
| A | 617 | CA | B | 170 | CA | 20.7  | 1.0 |
| A | 617 | CA | B | 236 | CA | 33.44 | 1.0 |
| A | 617 | CA | B | 82  | CA | 36.15 | 1.0 |
| A | 667 | CA | B | 82  | CA | 45.54 | 1.0 |
| A | 667 | CA | B | 170 | CA | 39.27 | 1.0 |
| A | 667 | CA | B | 236 | CA | 47.58 | 1.0 |
| A | 584 | CA | B | 82  | CA | 55.42 | 1.0 |
| A | 584 | CA | B | 170 | CA | 36.14 | 1.0 |
| A | 584 | CA | B | 236 | CA | 59.69 | 1.0 |

1AY7

|   |    |    |   |    |    |       |     |
|---|----|----|---|----|----|-------|-----|
| A | 22 | CA | B | 14 | CA | 30.59 | 1.0 |
| A | 22 | CA | B | 22 | CA | 34.67 | 1.0 |
| A | 22 | CA | B | 6  | CA | 33.85 | 1.0 |

Restraint Sets

|   |    |    |   |    |    |       |     |
|---|----|----|---|----|----|-------|-----|
| A | 62 | CA | B | 14 | CA | 41.96 | 1.0 |
| A | 62 | CA | B | 22 | CA | 42.19 | 1.0 |
| A | 62 | CA | B | 6  | CA | 38.12 | 1.0 |
| A | 35 | CA | B | 6  | CA | 21.94 | 1.0 |
| A | 35 | CA | B | 14 | CA | 21.51 | 1.0 |
| A | 35 | CA | B | 22 | CA | 20.67 | 1.0 |
| A | 81 | CA | B | 6  | CA | 37.56 | 1.0 |
| A | 81 | CA | B | 14 | CA | 31.15 | 1.0 |
| A | 81 | CA | B | 22 | CA | 26.67 | 1.0 |

1AZS

|   |     |    |   |      |    |       |     |
|---|-----|----|---|------|----|-------|-----|
| A | 91  | CA | B | 405  | CA | 66.75 | 1.0 |
| A | 91  | CA | B | 429  | CA | 59.89 | 1.0 |
| A | 91  | CA | B | 1650 | CA | 65.15 | 1.0 |
| A | 111 | CA | B | 405  | CA | 71.63 | 1.0 |
| A | 111 | CA | B | 429  | CA | 78.55 | 1.0 |
| A | 111 | CA | B | 1650 | CA | 58.88 | 1.0 |
| A | 354 | CA | B | 405  | CA | 63.53 | 1.0 |
| A | 354 | CA | B | 429  | CA | 57.41 | 1.0 |
| A | 354 | CA | B | 1650 | CA | 48.62 | 1.0 |
| A | 329 | CA | B | 405  | CA | 89.01 | 1.0 |
| A | 329 | CA | B | 429  | CA | 82.66 | 1.0 |
| A | 329 | CA | B | 1650 | CA | 75.05 | 1.0 |

1B6C

|   |     |    |   |     |    |       |     |
|---|-----|----|---|-----|----|-------|-----|
| A | 196 | CA | B | 41  | CA | 13.63 | 1.0 |
| A | 196 | CA | B | 58  | CA | 12.62 | 1.0 |
| A | 196 | CA | B | 106 | CA | 18.15 | 1.0 |
| A | 439 | CA | B | 41  | CA | 53.57 | 1.0 |
| A | 439 | CA | B | 58  | CA | 50.84 | 1.0 |
| A | 439 | CA | B | 106 | CA | 62.83 | 1.0 |
| A | 188 | CA | B | 41  | CA | 10.55 | 1.0 |
| A | 188 | CA | B | 58  | CA | 24.23 | 1.0 |
| A | 188 | CA | B | 106 | CA | 29.35 | 1.0 |
| A | 225 | CA | B | 41  | CA | 25.07 | 1.0 |
| A | 225 | CA | B | 58  | CA | 26.56 | 1.0 |
| A | 225 | CA | B | 106 | CA | 20.92 | 1.0 |

1BGX

|   |     |    |   |     |    |       |     |
|---|-----|----|---|-----|----|-------|-----|
| A | 232 | CA | B | 123 | CA | 76.5  | 1.0 |
| A | 232 | CA | B | 184 | CA | 90.1  | 1.0 |
| A | 232 | CA | B | 65  | CA | 73.73 | 1.0 |
| A | 267 | CA | B | 123 | CA | 87.23 | 1.0 |
| A | 267 | CA | B | 184 | CA | 93.29 | 1.0 |
| A | 267 | CA | B | 65  | CA | 80.85 | 1.0 |
| A | 797 | CA | B | 65  | CA | 45.99 | 1.0 |
| A | 797 | CA | B | 123 | CA | 92.6  | 1.0 |
| A | 797 | CA | B | 184 | CA | 99.65 | 1.0 |
| A | 492 | CA | B | 65  | CA | 29.49 | 1.0 |
| A | 492 | CA | B | 123 | CA | 43.32 | 1.0 |
| A | 492 | CA | B | 184 | CA | 53.24 | 1.0 |

1BJ1

### Restraint Sets

|   |     |    |   |     |    |        |     |
|---|-----|----|---|-----|----|--------|-----|
| A | 37  | CA | B | 123 | CA | 97.13  | 1.0 |
| A | 37  | CA | B | 187 | CA | 108.02 | 1.0 |
| A | 37  | CA | B | 66  | CA | 58.31  | 1.0 |
| A | 218 | CA | B | 123 | CA | 98.92  | 1.0 |
| A | 218 | CA | B | 187 | CA | 111.06 | 1.0 |
| A | 218 | CA | B | 66  | CA | 65.22  | 1.0 |
| A | 288 | CA | B | 66  | CA | 23.82  | 1.0 |
| A | 288 | CA | B | 123 | CA | 56.49  | 1.0 |
| A | 288 | CA | B | 187 | CA | 65.34  | 1.0 |
| A | 241 | CA | B | 66  | CA | 25.31  | 1.0 |
| A | 241 | CA | B | 123 | CA | 73.53  | 1.0 |
| A | 241 | CA | B | 187 | CA | 81.79  | 1.0 |

#### 1BKD

|   |     |    |   |      |    |       |     |
|---|-----|----|---|------|----|-------|-----|
| A | 102 | CA | B | 632  | CA | 42.68 | 1.0 |
| A | 102 | CA | B | 725  | CA | 72.41 | 1.0 |
| A | 102 | CA | B | 1015 | CA | 15.84 | 1.0 |
| A | 128 | CA | B | 632  | CA | 40.32 | 1.0 |
| A | 128 | CA | B | 725  | CA | 72.95 | 1.0 |
| A | 128 | CA | B | 1015 | CA | 40.43 | 1.0 |
| A | 48  | CA | B | 632  | CA | 47.9  | 1.0 |
| A | 48  | CA | B | 725  | CA | 76.22 | 1.0 |
| A | 48  | CA | B | 1015 | CA | 48.03 | 1.0 |
| A | 31  | CA | B | 632  | CA | 21.28 | 1.0 |
| A | 31  | CA | B | 725  | CA | 47.54 | 1.0 |
| A | 31  | CA | B | 1015 | CA | 50.93 | 1.0 |

#### 1BUH

|   |    |    |   |     |    |       |     |
|---|----|----|---|-----|----|-------|-----|
| A | 27 | CA | B | 209 | CA | 20.81 | 1.0 |
| A | 27 | CA | B | 249 | CA | 45.2  | 1.0 |
| A | 27 | CA | B | 71  | CA | 41.02 | 1.0 |
| A | 41 | CA | B | 209 | CA | 24.52 | 1.0 |
| A | 41 | CA | B | 249 | CA | 45.71 | 1.0 |
| A | 41 | CA | B | 71  | CA | 57.16 | 1.0 |
| A | 15 | CA | B | 71  | CA | 57.15 | 1.0 |
| A | 15 | CA | B | 209 | CA | 19.49 | 1.0 |
| A | 15 | CA | B | 249 | CA | 22.29 | 1.0 |
| A | 35 | CA | B | 71  | CA | 45.15 | 1.0 |
| A | 35 | CA | B | 209 | CA | 16.14 | 1.0 |
| A | 35 | CA | B | 249 | CA | 41.04 | 1.0 |

#### 1BVK

|   |     |    |   |     |    |       |     |
|---|-----|----|---|-----|----|-------|-----|
| A | 6   | CA | B | 66  | CA | 24.07 | 1.0 |
| A | 6   | CA | B | 12  | CA | 45.88 | 1.0 |
| A | 6   | CA | B | 271 | CA | 32.73 | 1.0 |
| A | 89  | CA | B | 66  | CA | 29.04 | 1.0 |
| A | 89  | CA | B | 12  | CA | 50.41 | 1.0 |
| A | 89  | CA | B | 271 | CA | 40.86 | 1.0 |
| A | 47  | CA | B | 12  | CA | 64.93 | 1.0 |
| A | 47  | CA | B | 66  | CA | 48.46 | 1.0 |
| A | 47  | CA | B | 271 | CA | 35.72 | 1.0 |
| A | 102 | CA | B | 12  | CA | 38.09 | 1.0 |
| A | 102 | CA | B | 66  | CA | 24.5  | 1.0 |

Restraint Sets

A 102 CA B 271 CA 25.83 1.0

1BVN

A 813 CA B 29 CA 44.55 1.0  
 A 813 CA B 174 CA 42.71 1.0  
 A 813 CA B 437 CA 39.01 1.0  
 A 847 CA B 29 CA 51.09 1.0  
 A 847 CA B 174 CA 39.04 1.0  
 A 847 CA B 437 CA 46.98 1.0  
 A 804 CA B 29 CA 59.98 1.0  
 A 804 CA B 174 CA 47.48 1.0  
 A 804 CA B 437 CA 58.41 1.0  
 A 861 CA B 29 CA 38.5 1.0  
 A 861 CA B 174 CA 29.23 1.0  
 A 861 CA B 437 CA 51.6 1.0

1CGI

A 34 CA B 174 CA 23.44 1.0  
 A 34 CA B 243 CA 36.05 1.0  
 A 34 CA B 156 CA 23.61 1.0  
 A 44 CA B 174 CA 25.31 1.0  
 A 44 CA B 243 CA 49.13 1.0  
 A 44 CA B 156 CA 30.98 1.0  
 A 1 CA B 156 CA 44.13 1.0  
 A 1 CA B 174 CA 44.55 1.0  
 A 1 CA B 243 CA 53.83 1.0  
 A 13 CA B 156 CA 26.61 1.0  
 A 13 CA B 174 CA 9.58 1.0  
 A 13 CA B 243 CA 33.38 1.0

1CLV

A 511 CA B 29 CA 43.38 1.0  
 A 511 CA B 162 CA 31.9 1.0  
 A 511 CA B 412 CA 54.43 1.0  
 A 520 CA B 29 CA 46.54 1.0  
 A 520 CA B 162 CA 41.74 1.0  
 A 520 CA B 412 CA 43.02 1.0  
 A 506 CA B 29 CA 36.33 1.0  
 A 506 CA B 162 CA 29.2 1.0  
 A 506 CA B 412 CA 42.92 1.0  
 A 524 CA B 29 CA 36.47 1.0  
 A 524 CA B 162 CA 35.63 1.0  
 A 524 CA B 412 CA 42.63 1.0

1D6R

A 13 CA B 165 CA 18.57 1.0  
 A 13 CA B 244 CA 35.16 1.0  
 A 13 CA B 20 CA 25.8 1.0  
 A 14 CA B 165 CA 20.01 1.0  
 A 14 CA B 244 CA 33.06 1.0  
 A 14 CA B 20 CA 23.76 1.0  
 A 38 CA B 20 CA 40.76 1.0  
 A 38 CA B 165 CA 30.16 1.0

Restraint Sets

|   |    |    |   |     |    |       |     |
|---|----|----|---|-----|----|-------|-----|
| A | 38 | CA | B | 244 | CA | 37.81 | 1.0 |
| A | 63 | CA | B | 20  | CA | 37.88 | 1.0 |
| A | 63 | CA | B | 165 | CA | 31.22 | 1.0 |
| A | 63 | CA | B | 244 | CA | 53.71 | 1.0 |

1DE4

|   |      |    |   |     |    |        |     |
|---|------|----|---|-----|----|--------|-----|
| A | 124  | CA | B | 56  | CA | 28.99  | 1.0 |
| A | 124  | CA | B | 150 | CA | 47.48  | 1.0 |
| A | 124  | CA | B | 193 | CA | 67.98  | 1.0 |
| A | 346  | CA | B | 56  | CA | 75     | 1.0 |
| A | 346  | CA | B | 150 | CA | 60.56  | 1.0 |
| A | 346  | CA | B | 193 | CA | 89.44  | 1.0 |
| A | 1326 | CA | B | 56  | CA | 70.47  | 1.0 |
| A | 1326 | CA | B | 150 | CA | 57.99  | 1.0 |
| A | 1326 | CA | B | 193 | CA | 112.55 | 1.0 |
| A | 638  | CA | B | 56  | CA | 44.76  | 1.0 |
| A | 638  | CA | B | 150 | CA | 8.83   | 1.0 |
| A | 638  | CA | B | 193 | CA | 65.4   | 1.0 |

1DFJ

|   |     |    |   |    |    |       |     |
|---|-----|----|---|----|----|-------|-----|
| A | 21  | CA | B | 5  | CA | 39.35 | 1.0 |
| A | 21  | CA | B | 28 | CA | 26.79 | 1.0 |
| A | 21  | CA | B | 62 | CA | 56.23 | 1.0 |
| A | 209 | CA | B | 5  | CA | 53.23 | 1.0 |
| A | 209 | CA | B | 28 | CA | 35.7  | 1.0 |
| A | 209 | CA | B | 62 | CA | 54.75 | 1.0 |
| A | 364 | CA | B | 5  | CA | 43.44 | 1.0 |
| A | 364 | CA | B | 28 | CA | 42.13 | 1.0 |
| A | 364 | CA | B | 62 | CA | 48.63 | 1.0 |
| A | 191 | CA | B | 5  | CA | 59.41 | 1.0 |
| A | 191 | CA | B | 28 | CA | 38.7  | 1.0 |
| A | 191 | CA | B | 62 | CA | 66.23 | 1.0 |

1DQJ

|   |     |    |   |     |    |       |     |
|---|-----|----|---|-----|----|-------|-----|
| A | 5   | CA | B | 122 | CA | 82.87 | 1.0 |
| A | 5   | CA | B | 188 | CA | 82.72 | 1.0 |
| A | 5   | CA | B | 53  | CA | 24.42 | 1.0 |
| A | 14  | CA | B | 122 | CA | 69.6  | 1.0 |
| A | 14  | CA | B | 188 | CA | 69.62 | 1.0 |
| A | 14  | CA | B | 53  | CA | 12.54 | 1.0 |
| A | 67  | CA | B | 53  | CA | 25.06 | 1.0 |
| A | 67  | CA | B | 122 | CA | 74.38 | 1.0 |
| A | 67  | CA | B | 188 | CA | 80.32 | 1.0 |
| A | 117 | CA | B | 53  | CA | 32.53 | 1.0 |
| A | 117 | CA | B | 122 | CA | 78.42 | 1.0 |
| A | 117 | CA | B | 188 | CA | 77.03 | 1.0 |

1E4K

|   |    |    |   |     |    |       |     |
|---|----|----|---|-----|----|-------|-----|
| A | 83 | CA | B | 315 | CA | 42.04 | 1.0 |
| A | 83 | CA | B | 419 | CA | 78.09 | 1.0 |
| A | 83 | CA | B | 774 | CA | 44.56 | 1.0 |
| A | 38 | CA | B | 315 | CA | 60.15 | 1.0 |
| A | 38 | CA | B | 419 | CA | 97.41 | 1.0 |

Restraint Sets

|   |     |    |   |     |    |       |     |
|---|-----|----|---|-----|----|-------|-----|
| A | 38  | CA | B | 774 | CA | 62.3  | 1.0 |
| A | 160 | CA | B | 315 | CA | 34.84 | 1.0 |
| A | 160 | CA | B | 419 | CA | 64    | 1.0 |
| A | 160 | CA | B | 774 | CA | 29.76 | 1.0 |
| A | 147 | CA | B | 315 | CA | 45.59 | 1.0 |
| A | 147 | CA | B | 419 | CA | 79.71 | 1.0 |
| A | 147 | CA | B | 774 | CA | 37.17 | 1.0 |

1E6E

|   |     |    |   |     |    |       |     |
|---|-----|----|---|-----|----|-------|-----|
| A | 61  | CA | B | 27  | CA | 32.48 | 1.0 |
| A | 61  | CA | B | 259 | CA | 39.77 | 1.0 |
| A | 61  | CA | B | 416 | CA | 63.69 | 1.0 |
| A | 72  | CA | B | 27  | CA | 34.13 | 1.0 |
| A | 72  | CA | B | 259 | CA | 21.86 | 1.0 |
| A | 72  | CA | B | 416 | CA | 56.6  | 1.0 |
| A | 37  | CA | B | 27  | CA | 12.46 | 1.0 |
| A | 37  | CA | B | 259 | CA | 50.05 | 1.0 |
| A | 37  | CA | B | 416 | CA | 43.11 | 1.0 |
| A | 112 | CA | B | 27  | CA | 20.67 | 1.0 |
| A | 112 | CA | B | 259 | CA | 43.64 | 1.0 |
| A | 112 | CA | B | 416 | CA | 45.22 | 1.0 |

1E6J

|   |     |    |   |     |    |       |     |
|---|-----|----|---|-----|----|-------|-----|
| A | 161 | CA | B | 120 | CA | 76.27 | 1.0 |
| A | 161 | CA | B | 182 | CA | 80.02 | 1.0 |
| A | 161 | CA | B | 65  | CA | 30.02 | 1.0 |
| A | 179 | CA | B | 120 | CA | 74.34 | 1.0 |
| A | 179 | CA | B | 182 | CA | 76.43 | 1.0 |
| A | 179 | CA | B | 65  | CA | 46.38 | 1.0 |
| A | 206 | CA | B | 65  | CA | 24.06 | 1.0 |
| A | 206 | CA | B | 120 | CA | 62.71 | 1.0 |
| A | 206 | CA | B | 182 | CA | 64.64 | 1.0 |
| A | 151 | CA | B | 65  | CA | 40.95 | 1.0 |
| A | 151 | CA | B | 120 | CA | 82.96 | 1.0 |
| A | 151 | CA | B | 182 | CA | 84.55 | 1.0 |

###

|   |     |    |   |     |    |       |     |
|---|-----|----|---|-----|----|-------|-----|
| A | 18  | CA | B | 25  | CA | 24.49 | 1.0 |
| A | 18  | CA | B | 131 | CA | 52.12 | 1.0 |
| A | 18  | CA | B | 177 | CA | 43.67 | 1.0 |
| A | 66  | CA | B | 25  | CA | 19.25 | 1.0 |
| A | 66  | CA | B | 131 | CA | 27.28 | 1.0 |
| A | 66  | CA | B | 177 | CA | 40.11 | 1.0 |
| A | 152 | CA | B | 25  | CA | 15.83 | 1.0 |
| A | 152 | CA | B | 131 | CA | 46.83 | 1.0 |
| A | 152 | CA | B | 177 | CA | 31.63 | 1.0 |
| A | 135 | CA | B | 25  | CA | 35.71 | 1.0 |
| A | 135 | CA | B | 131 | CA | 51.7  | 1.0 |
| A | 135 | CA | B | 177 | CA | 57.57 | 1.0 |

1EAW

|   |    |    |   |     |    |       |     |
|---|----|----|---|-----|----|-------|-----|
| A | 48 | CA | B | 171 | CA | 37.85 | 1.0 |
| A | 48 | CA | B | 241 | CA | 38.9  | 1.0 |



Restraint Sets

|   |    |    |   |     |    |       |     |
|---|----|----|---|-----|----|-------|-----|
| A | 48 | CA | B | 21  | CA | 33.95 | 1.0 |
| A | 54 | CA | B | 171 | CA | 38.5  | 1.0 |
| A | 54 | CA | B | 241 | CA | 41.95 | 1.0 |
| A | 54 | CA | B | 21  | CA | 41.84 | 1.0 |
| A | 13 | CA | B | 21  | CA | 24.57 | 1.0 |
| A | 13 | CA | B | 171 | CA | 14.51 | 1.0 |
| A | 13 | CA | B | 241 | CA | 28.3  | 1.0 |
| A | 26 | CA | B | 21  | CA | 38.78 | 1.0 |
| A | 26 | CA | B | 171 | CA | 36.38 | 1.0 |
| A | 26 | CA | B | 241 | CA | 50.2  | 1.0 |

1EER

|   |     |    |   |    |    |       |     |
|---|-----|----|---|----|----|-------|-----|
| A | 10  | CA | B | 10 | CA | 34.56 | 1.0 |
| A | 10  | CA | B | 49 | CA | 20.9  | 1.0 |
| A | 10  | CA | B | 81 | CA | 51.49 | 1.0 |
| A | 320 | CA | B | 10 | CA | 32.12 | 1.0 |
| A | 320 | CA | B | 49 | CA | 58.18 | 1.0 |
| A | 320 | CA | B | 81 | CA | 41.36 | 1.0 |
| A | 361 | CA | B | 10 | CA | 26.02 | 1.0 |
| A | 361 | CA | B | 49 | CA | 37.19 | 1.0 |
| A | 361 | CA | B | 81 | CA | 23.19 | 1.0 |
| A | 386 | CA | B | 10 | CA | 24.72 | 1.0 |
| A | 386 | CA | B | 49 | CA | 42.7  | 1.0 |
| A | 386 | CA | B | 81 | CA | 15.24 | 1.0 |

1EFN

|   |     |    |   |     |    |       |     |
|---|-----|----|---|-----|----|-------|-----|
| A | 139 | CA | B | 105 | CA | 35.16 | 1.0 |
| A | 139 | CA | B | 117 | CA | 18.08 | 1.0 |
| A | 139 | CA | B | 197 | CA | 46.16 | 1.0 |
| A | 112 | CA | B | 105 | CA | 39.85 | 1.0 |
| A | 112 | CA | B | 117 | CA | 22.63 | 1.0 |
| A | 112 | CA | B | 197 | CA | 41.41 | 1.0 |
| A | 126 | CA | B | 105 | CA | 39.45 | 1.0 |
| A | 126 | CA | B | 117 | CA | 22.42 | 1.0 |
| A | 126 | CA | B | 197 | CA | 46.9  | 1.0 |
| A | 117 | CA | B | 105 | CA | 32.16 | 1.0 |
| A | 117 | CA | B | 117 | CA | 17.5  | 1.0 |
| A | 117 | CA | B | 197 | CA | 34.33 | 1.0 |

1EWY

|   |    |    |   |     |    |       |     |
|---|----|----|---|-----|----|-------|-----|
| A | 26 | CA | B | 116 | CA | 27.92 | 1.0 |
| A | 26 | CA | B | 177 | CA | 44.96 | 1.0 |
| A | 26 | CA | B | 279 | CA | 29.09 | 1.0 |
| A | 31 | CA | B | 116 | CA | 27.35 | 1.0 |
| A | 31 | CA | B | 177 | CA | 50.75 | 1.0 |
| A | 31 | CA | B | 279 | CA | 34.24 | 1.0 |
| A | 69 | CA | B | 116 | CA | 27.54 | 1.0 |
| A | 69 | CA | B | 177 | CA | 30.71 | 1.0 |
| A | 69 | CA | B | 279 | CA | 38.22 | 1.0 |
| A | 1  | CA | B | 116 | CA | 40.17 | 1.0 |
| A | 1  | CA | B | 177 | CA | 49.21 | 1.0 |
| A | 1  | CA | B | 279 | CA | 21.36 | 1.0 |

## Restraint Sets

### 1EZU

|   |     |    |   |     |    |       |     |
|---|-----|----|---|-----|----|-------|-----|
| A | 62  | CA | B | 571 | CA | 24.94 | 1.0 |
| A | 62  | CA | B | 644 | CA | 24.83 | 1.0 |
| A | 62  | CA | B | 421 | CA | 42.24 | 1.0 |
| A | 47  | CA | B | 571 | CA | 51.78 | 1.0 |
| A | 47  | CA | B | 644 | CA | 49.55 | 1.0 |
| A | 47  | CA | B | 421 | CA | 73.73 | 1.0 |
| A | 479 | CA | B | 421 | CA | 30.42 | 1.0 |
| A | 479 | CA | B | 571 | CA | 13.58 | 1.0 |
| A | 479 | CA | B | 644 | CA | 41.88 | 1.0 |
| A | 451 | CA | B | 421 | CA | 25.46 | 1.0 |
| A | 451 | CA | B | 571 | CA | 20.53 | 1.0 |
| A | 451 | CA | B | 644 | CA | 31.31 | 1.0 |

### 1F34

|   |     |    |   |     |    |       |     |
|---|-----|----|---|-----|----|-------|-----|
| A | 35  | CA | B | 114 | CA | 53.66 | 1.0 |
| A | 35  | CA | B | 142 | CA | 26.34 | 1.0 |
| A | 35  | CA | B | 233 | CA | 64.83 | 1.0 |
| A | 50  | CA | B | 114 | CA | 39.91 | 1.0 |
| A | 50  | CA | B | 142 | CA | 16.02 | 1.0 |
| A | 50  | CA | B | 233 | CA | 60.04 | 1.0 |
| A | 138 | CA | B | 114 | CA | 23.74 | 1.0 |
| A | 138 | CA | B | 142 | CA | 36.74 | 1.0 |
| A | 138 | CA | B | 233 | CA | 21.38 | 1.0 |
| A | 116 | CA | B | 114 | CA | 17.7  | 1.0 |
| A | 116 | CA | B | 142 | CA | 37.66 | 1.0 |
| A | 116 | CA | B | 233 | CA | 29.81 | 1.0 |

### 1F51

|   |      |    |   |     |    |       |     |
|---|------|----|---|-----|----|-------|-----|
| A | 1213 | CA | B | 44  | CA | 17.52 | 1.0 |
| A | 1213 | CA | B | 121 | CA | 21.9  | 1.0 |
| A | 1213 | CA | B | 524 | CA | 50.94 | 1.0 |
| A | 1246 | CA | B | 44  | CA | 29.91 | 1.0 |
| A | 1246 | CA | B | 121 | CA | 31.31 | 1.0 |
| A | 1246 | CA | B | 524 | CA | 66.84 | 1.0 |
| A | 1259 | CA | B | 44  | CA | 30.65 | 1.0 |
| A | 1259 | CA | B | 121 | CA | 13.9  | 1.0 |
| A | 1259 | CA | B | 524 | CA | 51.32 | 1.0 |
| A | 1287 | CA | B | 44  | CA | 28.08 | 1.0 |
| A | 1287 | CA | B | 121 | CA | 33.77 | 1.0 |
| A | 1287 | CA | B | 524 | CA | 40.15 | 1.0 |

### 1F6M

|   |    |    |   |     |    |       |     |
|---|----|----|---|-----|----|-------|-----|
| A | 33 | CA | B | 122 | CA | 26.34 | 1.0 |
| A | 33 | CA | B | 196 | CA | 32.42 | 1.0 |
| A | 33 | CA | B | 5   | CA | 30    | 1.0 |
| A | 48 | CA | B | 122 | CA | 34.07 | 1.0 |
| A | 48 | CA | B | 196 | CA | 55.72 | 1.0 |
| A | 48 | CA | B | 5   | CA | 25.8  | 1.0 |
| A | 10 | CA | B | 5   | CA | 48.31 | 1.0 |
| A | 10 | CA | B | 122 | CA | 35.99 | 1.0 |
| A | 10 | CA | B | 196 | CA | 42.76 | 1.0 |
| A | 88 | CA | B | 5   | CA | 38.14 | 1.0 |

Restraint Sets

|   |    |    |   |     |    |       |     |
|---|----|----|---|-----|----|-------|-----|
| A | 88 | CA | B | 122 | CA | 18.69 | 1.0 |
| A | 88 | CA | B | 196 | CA | 43.95 | 1.0 |

1FAK

|   |     |    |   |     |    |       |     |
|---|-----|----|---|-----|----|-------|-----|
| A | 104 | CA | B | 369 | CA | 30.26 | 1.0 |
| A | 104 | CA | B | 442 | CA | 54.21 | 1.0 |
| A | 104 | CA | B | 63  | CA | 21.77 | 1.0 |
| A | 78  | CA | B | 369 | CA | 21.43 | 1.0 |
| A | 78  | CA | B | 442 | CA | 34.34 | 1.0 |
| A | 78  | CA | B | 63  | CA | 35.17 | 1.0 |
| A | 138 | CA | B | 63  | CA | 22.8  | 1.0 |
| A | 138 | CA | B | 369 | CA | 42.4  | 1.0 |
| A | 138 | CA | B | 442 | CA | 50.59 | 1.0 |
| A | 206 | CA | B | 63  | CA | 11.18 | 1.0 |
| A | 206 | CA | B | 369 | CA | 50.88 | 1.0 |
| A | 206 | CA | B | 442 | CA | 72.89 | 1.0 |

1FC2

|   |     |    |   |     |    |       |     |
|---|-----|----|---|-----|----|-------|-----|
| A | 257 | CA | B | 135 | CA | 18.17 | 1.0 |
| A | 257 | CA | B | 145 | CA | 21.23 | 1.0 |
| A | 257 | CA | B | 154 | CA | 13.02 | 1.0 |
| A | 324 | CA | B | 135 | CA | 38.35 | 1.0 |
| A | 324 | CA | B | 145 | CA | 35.8  | 1.0 |
| A | 324 | CA | B | 154 | CA | 34.04 | 1.0 |
| A | 342 | CA | B | 135 | CA | 19.39 | 1.0 |
| A | 342 | CA | B | 145 | CA | 23.76 | 1.0 |
| A | 342 | CA | B | 154 | CA | 26.7  | 1.0 |
| A | 420 | CA | B | 135 | CA | 39.99 | 1.0 |
| A | 420 | CA | B | 145 | CA | 49.25 | 1.0 |
| A | 420 | CA | B | 154 | CA | 39.76 | 1.0 |

1FCC

|   |    |    |   |     |    |       |     |
|---|----|----|---|-----|----|-------|-----|
| A | 13 | CA | B | 811 | CA | 70.57 | 1.0 |
| A | 13 | CA | B | 918 | CA | 46.41 | 1.0 |
| A | 13 | CA | B | 275 | CA | 44.74 | 1.0 |
| A | 17 | CA | B | 811 | CA | 64.43 | 1.0 |
| A | 17 | CA | B | 918 | CA | 46.47 | 1.0 |
| A | 17 | CA | B | 275 | CA | 42.43 | 1.0 |
| A | 26 | CA | B | 275 | CA | 36.03 | 1.0 |
| A | 26 | CA | B | 811 | CA | 56.04 | 1.0 |
| A | 26 | CA | B | 918 | CA | 42.22 | 1.0 |
| A | 41 | CA | B | 275 | CA | 35.3  | 1.0 |
| A | 41 | CA | B | 811 | CA | 60.12 | 1.0 |
| A | 41 | CA | B | 918 | CA | 39.75 | 1.0 |

1FFW

|   |     |    |   |    |    |       |     |
|---|-----|----|---|----|----|-------|-----|
| A | 171 | CA | B | 15 | CA | 34.15 | 1.0 |
| A | 171 | CA | B | 27 | CA | 25.75 | 1.0 |
| A | 171 | CA | B | 74 | CA | 31.23 | 1.0 |
| A | 182 | CA | B | 15 | CA | 31.37 | 1.0 |
| A | 182 | CA | B | 27 | CA | 32.53 | 1.0 |
| A | 182 | CA | B | 74 | CA | 26.43 | 1.0 |
| A | 226 | CA | B | 15 | CA | 50.88 | 1.0 |

Restraint Sets

|   |     |    |   |    |    |       |     |
|---|-----|----|---|----|----|-------|-----|
| A | 226 | CA | B | 27 | CA | 48.37 | 1.0 |
| A | 226 | CA | B | 74 | CA | 38.68 | 1.0 |
| A | 218 | CA | B | 15 | CA | 37.38 | 1.0 |
| A | 218 | CA | B | 27 | CA | 32.74 | 1.0 |
| A | 218 | CA | B | 74 | CA | 22.51 | 1.0 |

1FLE

|   |    |    |   |     |    |       |     |
|---|----|----|---|-----|----|-------|-----|
| A | 22 | CA | B | 57  | CA | 11.1  | 1.0 |
| A | 22 | CA | B | 166 | CA | 21.97 | 1.0 |
| A | 22 | CA | B | 82  | CA | 29.27 | 1.0 |
| A | 45 | CA | B | 57  | CA | 17.58 | 1.0 |
| A | 45 | CA | B | 166 | CA | 31.18 | 1.0 |
| A | 45 | CA | B | 82  | CA | 37.02 | 1.0 |
| A | 27 | CA | B | 57  | CA | 11.21 | 1.0 |
| A | 27 | CA | B | 82  | CA | 23.3  | 1.0 |
| A | 27 | CA | B | 166 | CA | 32.39 | 1.0 |
| A | 11 | CA | B | 57  | CA | 28.63 | 1.0 |
| A | 11 | CA | B | 82  | CA | 46.29 | 1.0 |
| A | 11 | CA | B | 166 | CA | 42.07 | 1.0 |

1FQ1

|   |     |    |   |     |    |       |     |
|---|-----|----|---|-----|----|-------|-----|
| A | 57  | CA | B | 70  | CA | 54.78 | 1.0 |
| A | 57  | CA | B | 86  | CA | 32.63 | 1.0 |
| A | 57  | CA | B | 197 | CA | 55.02 | 1.0 |
| A | 101 | CA | B | 70  | CA | 59.36 | 1.0 |
| A | 101 | CA | B | 86  | CA | 49.84 | 1.0 |
| A | 101 | CA | B | 197 | CA | 57.18 | 1.0 |
| A | 232 | CA | B | 70  | CA | 47.37 | 1.0 |
| A | 232 | CA | B | 86  | CA | 34.87 | 1.0 |
| A | 232 | CA | B | 197 | CA | 24.08 | 1.0 |
| A | 161 | CA | B | 70  | CA | 25.49 | 1.0 |
| A | 161 | CA | B | 86  | CA | 12.04 | 1.0 |
| A | 161 | CA | B | 197 | CA | 31.24 | 1.0 |

1FQJ

|   |     |    |   |     |    |       |     |
|---|-----|----|---|-----|----|-------|-----|
| A | 337 | CA | B | 59  | CA | 42.42 | 1.0 |
| A | 337 | CA | B | 95  | CA | 43.19 | 1.0 |
| A | 337 | CA | B | 342 | CA | 57.71 | 1.0 |
| A | 367 | CA | B | 59  | CA | 36.88 | 1.0 |
| A | 367 | CA | B | 95  | CA | 32.44 | 1.0 |
| A | 367 | CA | B | 342 | CA | 41.15 | 1.0 |
| A | 408 | CA | B | 59  | CA | 22.35 | 1.0 |
| A | 408 | CA | B | 95  | CA | 52.8  | 1.0 |
| A | 408 | CA | B | 342 | CA | 34.89 | 1.0 |
| A | 358 | CA | B | 59  | CA | 41.76 | 1.0 |
| A | 358 | CA | B | 95  | CA | 46.45 | 1.0 |
| A | 358 | CA | B | 342 | CA | 36.46 | 1.0 |

1FSK

|   |     |    |   |     |    |       |     |
|---|-----|----|---|-----|----|-------|-----|
| A | 15  | CA | B | 184 | CA | 84.26 | 1.0 |
| A | 15  | CA | B | 495 | CA | 80.68 | 1.0 |
| A | 15  | CA | B | 359 | CA | 27.38 | 1.0 |
| A | 130 | CA | B | 184 | CA | 90.64 | 1.0 |

Restraint Sets

|   |     |    |   |     |    |       |     |
|---|-----|----|---|-----|----|-------|-----|
| A | 130 | CA | B | 495 | CA | 83.72 | 1.0 |
| A | 130 | CA | B | 359 | CA | 32.95 | 1.0 |
| A | 51  | CA | B | 184 | CA | 64.88 | 1.0 |
| A | 51  | CA | B | 359 | CA | 9.3   | 1.0 |
| A | 51  | CA | B | 495 | CA | 59.84 | 1.0 |
| A | 43  | CA | B | 184 | CA | 68.93 | 1.0 |
| A | 43  | CA | B | 359 | CA | 19.56 | 1.0 |
| A | 43  | CA | B | 495 | CA | 58.39 | 1.0 |

1GCQ

|   |     |    |   |     |    |       |     |
|---|-----|----|---|-----|----|-------|-----|
| A | 650 | CA | B | 205 | CA | 24.89 | 1.0 |
| A | 650 | CA | B | 186 | CA | 30.73 | 1.0 |
| A | 650 | CA | B | 211 | CA | 16.41 | 1.0 |
| A | 628 | CA | B | 205 | CA | 20.57 | 1.0 |
| A | 628 | CA | B | 186 | CA | 22.77 | 1.0 |
| A | 628 | CA | B | 211 | CA | 9.5   | 1.0 |
| A | 644 | CA | B | 186 | CA | 33.99 | 1.0 |
| A | 644 | CA | B | 205 | CA | 28.24 | 1.0 |
| A | 644 | CA | B | 211 | CA | 22.3  | 1.0 |
| A | 659 | CA | B | 186 | CA | 20.02 | 1.0 |
| A | 659 | CA | B | 205 | CA | 10.53 | 1.0 |
| A | 659 | CA | B | 211 | CA | 14.6  | 1.0 |

1GHQ

|   |     |    |   |     |    |       |     |
|---|-----|----|---|-----|----|-------|-----|
| A | 3   | CA | B | 4   | CA | 78.87 | 1.0 |
| A | 3   | CA | B | 64  | CA | 57.18 | 1.0 |
| A | 3   | CA | B | 211 | CA | 51.4  | 1.0 |
| A | 14  | CA | B | 4   | CA | 67.88 | 1.0 |
| A | 14  | CA | B | 64  | CA | 43.04 | 1.0 |
| A | 14  | CA | B | 211 | CA | 51.31 | 1.0 |
| A | 100 | CA | B | 4   | CA | 50.62 | 1.0 |
| A | 100 | CA | B | 64  | CA | 31.81 | 1.0 |
| A | 100 | CA | B | 211 | CA | 34.01 | 1.0 |
| A | 115 | CA | B | 4   | CA | 60.6  | 1.0 |
| A | 115 | CA | B | 64  | CA | 30.95 | 1.0 |
| A | 115 | CA | B | 211 | CA | 53.62 | 1.0 |

1GL1

|   |    |    |   |     |    |       |     |
|---|----|----|---|-----|----|-------|-----|
| A | 27 | CA | B | 172 | CA | 8.98  | 1.0 |
| A | 27 | CA | B | 243 | CA | 35.31 | 1.0 |
| A | 27 | CA | B | 21  | CA | 26.38 | 1.0 |
| A | 28 | CA | B | 172 | CA | 12.2  | 1.0 |
| A | 28 | CA | B | 243 | CA | 33.36 | 1.0 |
| A | 28 | CA | B | 21  | CA | 24.97 | 1.0 |
| A | 2  | CA | B | 21  | CA | 30.16 | 1.0 |
| A | 2  | CA | B | 172 | CA | 17.75 | 1.0 |
| A | 2  | CA | B | 243 | CA | 46.1  | 1.0 |
| A | 7  | CA | B | 21  | CA | 36.39 | 1.0 |
| A | 7  | CA | B | 172 | CA | 11.75 | 1.0 |
| A | 7  | CA | B | 243 | CA | 40.3  | 1.0 |

1GLA

|   |    |    |   |    |    |      |     |
|---|----|----|---|----|----|------|-----|
| A | 39 | CA | B | 65 | CA | 54.1 | 1.0 |
|---|----|----|---|----|----|------|-----|

Restraint Sets

|   |     |    |   |     |    |       |     |
|---|-----|----|---|-----|----|-------|-----|
| A | 39  | CA | B | 157 | CA | 62.7  | 1.0 |
| A | 39  | CA | B | 480 | CA | 11.84 | 1.0 |
| A | 129 | CA | B | 65  | CA | 71.36 | 1.0 |
| A | 129 | CA | B | 157 | CA | 75.37 | 1.0 |
| A | 129 | CA | B | 480 | CA | 19.79 | 1.0 |
| A | 110 | CA | B | 65  | CA | 57.03 | 1.0 |
| A | 110 | CA | B | 157 | CA | 78.22 | 1.0 |
| A | 110 | CA | B | 480 | CA | 26.89 | 1.0 |
| A | 19  | CA | B | 65  | CA | 65.09 | 1.0 |
| A | 19  | CA | B | 157 | CA | 87.2  | 1.0 |
| A | 19  | CA | B | 480 | CA | 36.9  | 1.0 |

1GP2

|   |     |    |   |     |    |       |     |
|---|-----|----|---|-----|----|-------|-----|
| A | 3   | CA | B | 63  | CA | 57.59 | 1.0 |
| A | 3   | CA | B | 99  | CA | 43.74 | 1.0 |
| A | 3   | CA | B | 214 | CA | 49.02 | 1.0 |
| A | 36  | CA | B | 63  | CA | 76.89 | 1.0 |
| A | 36  | CA | B | 99  | CA | 87.46 | 1.0 |
| A | 36  | CA | B | 214 | CA | 45.36 | 1.0 |
| A | 56  | CA | B | 63  | CA | 38.11 | 1.0 |
| A | 56  | CA | B | 99  | CA | 63.8  | 1.0 |
| A | 56  | CA | B | 214 | CA | 9.94  | 1.0 |
| A | 129 | CA | B | 63  | CA | 37.96 | 1.0 |
| A | 129 | CA | B | 99  | CA | 68.69 | 1.0 |
| A | 129 | CA | B | 214 | CA | 35.03 | 1.0 |

1GPW

|   |     |    |   |     |    |       |     |
|---|-----|----|---|-----|----|-------|-----|
| A | 55  | CA | B | 70  | CA | 27.25 | 1.0 |
| A | 55  | CA | B | 108 | CA | 34.66 | 1.0 |
| A | 55  | CA | B | 243 | CA | 44.52 | 1.0 |
| A | 75  | CA | B | 70  | CA | 34.93 | 1.0 |
| A | 75  | CA | B | 108 | CA | 55.79 | 1.0 |
| A | 75  | CA | B | 243 | CA | 49.65 | 1.0 |
| A | 135 | CA | B | 70  | CA | 23.56 | 1.0 |
| A | 135 | CA | B | 108 | CA | 42.02 | 1.0 |
| A | 135 | CA | B | 243 | CA | 17.93 | 1.0 |
| A | 116 | CA | B | 70  | CA | 31.46 | 1.0 |
| A | 116 | CA | B | 108 | CA | 28.91 | 1.0 |
| A | 116 | CA | B | 243 | CA | 28.77 | 1.0 |

1GRN

|   |     |    |   |     |    |       |     |
|---|-----|----|---|-----|----|-------|-----|
| A | 273 | CA | B | 103 | CA | 37.36 | 1.0 |
| A | 273 | CA | B | 131 | CA | 40.7  | 1.0 |
| A | 273 | CA | B | 50  | CA | 61.94 | 1.0 |
| A | 311 | CA | B | 103 | CA | 18.65 | 1.0 |
| A | 311 | CA | B | 131 | CA | 21.94 | 1.0 |
| A | 311 | CA | B | 50  | CA | 44.23 | 1.0 |
| A | 329 | CA | B | 50  | CA | 55.5  | 1.0 |
| A | 329 | CA | B | 103 | CA | 34.85 | 1.0 |
| A | 329 | CA | B | 131 | CA | 14.66 | 1.0 |
| A | 304 | CA | B | 50  | CA | 41.76 | 1.0 |
| A | 304 | CA | B | 103 | CA | 26.34 | 1.0 |
| A | 304 | CA | B | 131 | CA | 22.01 | 1.0 |

## Restraint Sets

### 1GXD

|   |     |    |   |     |    |        |     |
|---|-----|----|---|-----|----|--------|-----|
| A | 14  | CA | B | 239 | CA | 76.46  | 1.0 |
| A | 14  | CA | B | 297 | CA | 110.39 | 1.0 |
| A | 14  | CA | B | 627 | CA | 35.77  | 1.0 |
| A | 153 | CA | B | 239 | CA | 58.93  | 1.0 |
| A | 153 | CA | B | 297 | CA | 88.33  | 1.0 |
| A | 153 | CA | B | 627 | CA | 17.22  | 1.0 |
| A | 79  | CA | B | 239 | CA | 84.7   | 1.0 |
| A | 79  | CA | B | 297 | CA | 118.03 | 1.0 |
| A | 79  | CA | B | 627 | CA | 53.87  | 1.0 |
| A | 182 | CA | B | 239 | CA | 55.27  | 1.0 |
| A | 182 | CA | B | 297 | CA | 93.75  | 1.0 |
| A | 182 | CA | B | 627 | CA | 33.84  | 1.0 |

### 1H1V

|   |     |    |   |     |    |       |     |
|---|-----|----|---|-----|----|-------|-----|
| A | 489 | CA | B | 59  | CA | 46.29 | 1.0 |
| A | 489 | CA | B | 232 | CA | 61.53 | 1.0 |
| A | 489 | CA | B | 360 | CA | 23.32 | 1.0 |
| A | 614 | CA | B | 59  | CA | 69.38 | 1.0 |
| A | 614 | CA | B | 232 | CA | 66.63 | 1.0 |
| A | 614 | CA | B | 360 | CA | 67.1  | 1.0 |
| A | 649 | CA | B | 59  | CA | 40.39 | 1.0 |
| A | 649 | CA | B | 232 | CA | 23.17 | 1.0 |
| A | 649 | CA | B | 360 | CA | 54.77 | 1.0 |
| A | 659 | CA | B | 59  | CA | 52.3  | 1.0 |
| A | 659 | CA | B | 232 | CA | 45.87 | 1.0 |
| A | 659 | CA | B | 360 | CA | 51.16 | 1.0 |

### 1H9D

|   |    |    |   |     |    |       |     |
|---|----|----|---|-----|----|-------|-----|
| A | 16 | CA | B | 63  | CA | 21.26 | 1.0 |
| A | 16 | CA | B | 124 | CA | 30.43 | 1.0 |
| A | 16 | CA | B | 168 | CA | 24.73 | 1.0 |
| A | 37 | CA | B | 63  | CA | 38.23 | 1.0 |
| A | 37 | CA | B | 124 | CA | 33.53 | 1.0 |
| A | 37 | CA | B | 168 | CA | 26.19 | 1.0 |
| A | 92 | CA | B | 63  | CA | 45.17 | 1.0 |
| A | 92 | CA | B | 124 | CA | 39.65 | 1.0 |
| A | 92 | CA | B | 168 | CA | 39.58 | 1.0 |
| A | 2  | CA | B | 63  | CA | 15.71 | 1.0 |
| A | 2  | CA | B | 124 | CA | 16.45 | 1.0 |
| A | 2  | CA | B | 168 | CA | 31.32 | 1.0 |

### 1HCF

|   |     |    |   |     |    |       |     |
|---|-----|----|---|-----|----|-------|-----|
| A | 369 | CA | B | 37  | CA | 59.53 | 1.0 |
| A | 369 | CA | B | 124 | CA | 53.5  | 1.0 |
| A | 369 | CA | B | 308 | CA | 44.27 | 1.0 |
| A | 376 | CA | B | 37  | CA | 37.94 | 1.0 |
| A | 376 | CA | B | 124 | CA | 38.14 | 1.0 |
| A | 376 | CA | B | 308 | CA | 31.02 | 1.0 |
| A | 328 | CA | B | 37  | CA | 39.31 | 1.0 |
| A | 328 | CA | B | 124 | CA | 36.19 | 1.0 |
| A | 328 | CA | B | 308 | CA | 25.09 | 1.0 |

Restraint Sets

|   |     |    |   |     |    |       |     |
|---|-----|----|---|-----|----|-------|-----|
| A | 336 | CA | B | 37  | CA | 50.48 | 1.0 |
| A | 336 | CA | B | 124 | CA | 35.73 | 1.0 |
| A | 336 | CA | B | 308 | CA | 44.02 | 1.0 |

1HE1

|   |     |    |   |     |    |       |     |
|---|-----|----|---|-----|----|-------|-----|
| A | 104 | CA | B | 182 | CA | 32.28 | 1.0 |
| A | 104 | CA | B | 200 | CA | 49.08 | 1.0 |
| A | 104 | CA | B | 228 | CA | 27.66 | 1.0 |
| A | 131 | CA | B | 182 | CA | 27.56 | 1.0 |
| A | 131 | CA | B | 200 | CA | 21.68 | 1.0 |
| A | 131 | CA | B | 228 | CA | 43.64 | 1.0 |
| A | 36  | CA | B | 182 | CA | 13.78 | 1.0 |
| A | 36  | CA | B | 200 | CA | 34.21 | 1.0 |
| A | 36  | CA | B | 228 | CA | 17.34 | 1.0 |
| A | 43  | CA | B | 182 | CA | 30.98 | 1.0 |
| A | 43  | CA | B | 200 | CA | 49.92 | 1.0 |
| A | 43  | CA | B | 228 | CA | 38.77 | 1.0 |

1HE8

|   |    |    |   |     |    |        |     |
|---|----|----|---|-----|----|--------|-----|
| A | 25 | CA | B | 145 | CA | 57.44  | 1.0 |
| A | 25 | CA | B | 250 | CA | 20.12  | 1.0 |
| A | 25 | CA | B | 403 | CA | 93.43  | 1.0 |
| A | 87 | CA | B | 145 | CA | 82.15  | 1.0 |
| A | 87 | CA | B | 250 | CA | 33.66  | 1.0 |
| A | 87 | CA | B | 403 | CA | 108.71 | 1.0 |
| A | 74 | CA | B | 145 | CA | 60.9   | 1.0 |
| A | 74 | CA | B | 250 | CA | 31.39  | 1.0 |
| A | 74 | CA | B | 403 | CA | 81.71  | 1.0 |
| A | 47 | CA | B | 145 | CA | 64.59  | 1.0 |
| A | 47 | CA | B | 250 | CA | 39.7   | 1.0 |
| A | 47 | CA | B | 403 | CA | 94.62  | 1.0 |

1HIA

|   |    |    |   |     |    |       |     |
|---|----|----|---|-----|----|-------|-----|
| A | 35 | CA | B | 266 | CA | 33.67 | 1.0 |
| A | 35 | CA | B | 336 | CA | 36.74 | 1.0 |
| A | 35 | CA | B | 82  | CA | 24.6  | 1.0 |
| A | 16 | CA | B | 266 | CA | 20.25 | 1.0 |
| A | 16 | CA | B | 336 | CA | 35.77 | 1.0 |
| A | 16 | CA | B | 82  | CA | 41.02 | 1.0 |
| A | 8  | CA | B | 82  | CA | 53.34 | 1.0 |
| A | 8  | CA | B | 266 | CA | 30.41 | 1.0 |
| A | 8  | CA | B | 336 | CA | 46.82 | 1.0 |
| A | 19 | CA | B | 82  | CA | 48.77 | 1.0 |
| A | 19 | CA | B | 266 | CA | 19.86 | 1.0 |
| A | 19 | CA | B | 336 | CA | 41.2  | 1.0 |

1I2M

|   |     |    |   |     |    |       |     |
|---|-----|----|---|-----|----|-------|-----|
| A | 221 | CA | B | 72  | CA | 23.59 | 1.0 |
| A | 221 | CA | B | 136 | CA | 37.38 | 1.0 |
| A | 221 | CA | B | 169 | CA | 50.45 | 1.0 |
| A | 114 | CA | B | 72  | CA | 35.72 | 1.0 |
| A | 114 | CA | B | 136 | CA | 26.35 | 1.0 |
| A | 114 | CA | B | 169 | CA | 53.18 | 1.0 |



Restraint Sets

|   |     |    |   |     |    |       |     |
|---|-----|----|---|-----|----|-------|-----|
| A | 383 | CA | B | 72  | CA | 26.03 | 1.0 |
| A | 383 | CA | B | 136 | CA | 27.36 | 1.0 |
| A | 383 | CA | B | 169 | CA | 32.7  | 1.0 |
| A | 213 | CA | B | 72  | CA | 13.57 | 1.0 |
| A | 213 | CA | B | 136 | CA | 34.66 | 1.0 |
| A | 213 | CA | B | 169 | CA | 40.91 | 1.0 |

114D

|   |     |    |   |     |    |       |     |
|---|-----|----|---|-----|----|-------|-----|
| A | 25  | CA | B | 83  | CA | 42.11 | 1.0 |
| A | 25  | CA | B | 164 | CA | 62.19 | 1.0 |
| A | 25  | CA | B | 465 | CA | 60.62 | 1.0 |
| A | 131 | CA | B | 83  | CA | 45.52 | 1.0 |
| A | 131 | CA | B | 164 | CA | 86.93 | 1.0 |
| A | 131 | CA | B | 465 | CA | 44.51 | 1.0 |
| A | 66  | CA | B | 83  | CA | 26.9  | 1.0 |
| A | 66  | CA | B | 164 | CA | 71.33 | 1.0 |
| A | 66  | CA | B | 465 | CA | 63.99 | 1.0 |
| A | 178 | CA | B | 83  | CA | 55.67 | 1.0 |
| A | 178 | CA | B | 164 | CA | 43.59 | 1.0 |
| A | 178 | CA | B | 465 | CA | 81.39 | 1.0 |

119R

|   |     |    |   |     |    |       |     |
|---|-----|----|---|-----|----|-------|-----|
| A | 188 | CA | B | 154 | CA | 75.97 | 1.0 |
| A | 188 | CA | B | 454 | CA | 71.35 | 1.0 |
| A | 188 | CA | B | 778 | CA | 83.99 | 1.0 |
| A | 359 | CA | B | 154 | CA | 28.92 | 1.0 |
| A | 359 | CA | B | 454 | CA | 33.93 | 1.0 |
| A | 359 | CA | B | 778 | CA | 31.82 | 1.0 |
| A | 32  | CA | B | 154 | CA | 9.22  | 1.0 |
| A | 32  | CA | B | 454 | CA | 33.66 | 1.0 |
| A | 32  | CA | B | 778 | CA | 41.71 | 1.0 |
| A | 301 | CA | B | 154 | CA | 37.83 | 1.0 |
| A | 301 | CA | B | 454 | CA | 58.74 | 1.0 |
| A | 301 | CA | B | 778 | CA | 46.98 | 1.0 |

11B1

|   |     |    |   |     |    |       |     |
|---|-----|----|---|-----|----|-------|-----|
| A | 45  | CA | B | 137 | CA | 46.34 | 1.0 |
| A | 45  | CA | B | 204 | CA | 15.04 | 1.0 |
| A | 45  | CA | B | 459 | CA | 63.4  | 1.0 |
| A | 60  | CA | B | 137 | CA | 60.27 | 1.0 |
| A | 60  | CA | B | 204 | CA | 28.69 | 1.0 |
| A | 60  | CA | B | 459 | CA | 73.79 | 1.0 |
| A | 115 | CA | B | 137 | CA | 60.58 | 1.0 |
| A | 115 | CA | B | 204 | CA | 38.41 | 1.0 |
| A | 115 | CA | B | 459 | CA | 50.5  | 1.0 |
| A | 30  | CA | B | 137 | CA | 25.7  | 1.0 |
| A | 30  | CA | B | 204 | CA | 25.06 | 1.0 |
| A | 30  | CA | B | 459 | CA | 54.49 | 1.0 |

11BR

|   |    |    |   |     |    |       |     |
|---|----|----|---|-----|----|-------|-----|
| A | 15 | CA | B | 32  | CA | 19.54 | 1.0 |
| A | 15 | CA | B | 95  | CA | 31.73 | 1.0 |
| A | 15 | CA | B | 169 | CA | 27.88 | 1.0 |

Restraint Sets

|   |     |    |   |     |    |       |     |
|---|-----|----|---|-----|----|-------|-----|
| A | 85  | CA | B | 32  | CA | 53.6  | 1.0 |
| A | 85  | CA | B | 95  | CA | 43    | 1.0 |
| A | 85  | CA | B | 169 | CA | 50.01 | 1.0 |
| A | 440 | CA | B | 32  | CA | 46.56 | 1.0 |
| A | 440 | CA | B | 95  | CA | 31.62 | 1.0 |
| A | 440 | CA | B | 169 | CA | 48.48 | 1.0 |
| A | 229 | CA | B | 32  | CA | 47.91 | 1.0 |
| A | 229 | CA | B | 95  | CA | 39.26 | 1.0 |
| A | 229 | CA | B | 169 | CA | 26.41 | 1.0 |

1IJK

|   |     |    |   |     |    |       |     |
|---|-----|----|---|-----|----|-------|-----|
| A | 529 | CA | B | 23  | CA | 50.87 | 1.0 |
| A | 529 | CA | B | 48  | CA | 42.26 | 1.0 |
| A | 529 | CA | B | 453 | CA | 50.87 | 1.0 |
| A | 574 | CA | B | 23  | CA | 57.25 | 1.0 |
| A | 574 | CA | B | 48  | CA | 43.68 | 1.0 |
| A | 574 | CA | B | 453 | CA | 66.31 | 1.0 |
| A | 670 | CA | B | 23  | CA | 32.47 | 1.0 |
| A | 670 | CA | B | 48  | CA | 14.46 | 1.0 |
| A | 670 | CA | B | 453 | CA | 56.48 | 1.0 |
| A | 629 | CA | B | 23  | CA | 26.96 | 1.0 |
| A | 629 | CA | B | 48  | CA | 28.64 | 1.0 |
| A | 629 | CA | B | 453 | CA | 30.35 | 1.0 |

1IQD

|   |      |    |   |     |    |       |     |
|---|------|----|---|-----|----|-------|-----|
| A | 2176 | CA | B | 123 | CA | 90.43 | 1.0 |
| A | 2176 | CA | B | 185 | CA | 93.79 | 1.0 |
| A | 2176 | CA | B | 54  | CA | 36.56 | 1.0 |
| A | 2201 | CA | B | 123 | CA | 64    | 1.0 |
| A | 2201 | CA | B | 185 | CA | 64.77 | 1.0 |
| A | 2201 | CA | B | 54  | CA | 18.89 | 1.0 |
| A | 2225 | CA | B | 54  | CA | 12.46 | 1.0 |
| A | 2225 | CA | B | 123 | CA | 71.48 | 1.0 |
| A | 2225 | CA | B | 185 | CA | 73.23 | 1.0 |
| A | 2252 | CA | B | 54  | CA | 14.88 | 1.0 |
| A | 2252 | CA | B | 123 | CA | 58.35 | 1.0 |
| A | 2252 | CA | B | 185 | CA | 62.63 | 1.0 |

1IRA

|   |     |    |   |     |    |       |     |
|---|-----|----|---|-----|----|-------|-----|
| A | 12  | CA | B | 84  | CA | 38.76 | 1.0 |
| A | 12  | CA | B | 186 | CA | 46.05 | 1.0 |
| A | 12  | CA | B | 307 | CA | 39.68 | 1.0 |
| A | 104 | CA | B | 84  | CA | 44    | 1.0 |
| A | 104 | CA | B | 186 | CA | 44.51 | 1.0 |
| A | 104 | CA | B | 307 | CA | 40.34 | 1.0 |
| A | 37  | CA | B | 84  | CA | 32.08 | 1.0 |
| A | 37  | CA | B | 186 | CA | 28.61 | 1.0 |
| A | 37  | CA | B | 307 | CA | 60.57 | 1.0 |
| A | 73  | CA | B | 84  | CA | 28.78 | 1.0 |
| A | 73  | CA | B | 186 | CA | 50.62 | 1.0 |
| A | 73  | CA | B | 307 | CA | 55.04 | 1.0 |

1J2J

Restraint Sets

|   |     |    |   |     |    |       |     |
|---|-----|----|---|-----|----|-------|-----|
| A | 172 | CA | B | 39  | CA | 37.39 | 1.0 |
| A | 172 | CA | B | 100 | CA | 31.54 | 1.0 |
| A | 172 | CA | B | 178 | CA | 39.08 | 1.0 |
| A | 187 | CA | B | 39  | CA | 20.61 | 1.0 |
| A | 187 | CA | B | 100 | CA | 35.04 | 1.0 |
| A | 187 | CA | B | 178 | CA | 27.93 | 1.0 |
| A | 206 | CA | B | 39  | CA | 35.08 | 1.0 |
| A | 206 | CA | B | 100 | CA | 31.06 | 1.0 |
| A | 206 | CA | B | 178 | CA | 48.3  | 1.0 |
| A | 183 | CA | B | 39  | CA | 25.3  | 1.0 |
| A | 183 | CA | B | 100 | CA | 29.99 | 1.0 |
| A | 183 | CA | B | 178 | CA | 25.06 | 1.0 |

1JIW

|   |    |    |   |     |    |       |     |
|---|----|----|---|-----|----|-------|-----|
| A | 11 | CA | B | 32  | CA | 35.63 | 1.0 |
| A | 11 | CA | B | 70  | CA | 33.79 | 1.0 |
| A | 11 | CA | B | 419 | CA | 67.99 | 1.0 |
| A | 18 | CA | B | 32  | CA | 37.6  | 1.0 |
| A | 18 | CA | B | 70  | CA | 47.7  | 1.0 |
| A | 18 | CA | B | 419 | CA | 64.02 | 1.0 |
| A | 37 | CA | B | 32  | CA | 34.17 | 1.0 |
| A | 37 | CA | B | 70  | CA | 45.99 | 1.0 |
| A | 37 | CA | B | 419 | CA | 52.72 | 1.0 |
| A | 66 | CA | B | 32  | CA | 23.73 | 1.0 |
| A | 66 | CA | B | 70  | CA | 31.08 | 1.0 |
| A | 66 | CA | B | 419 | CA | 61.15 | 1.0 |

1JK9

|   |     |    |   |     |    |       |     |
|---|-----|----|---|-----|----|-------|-----|
| A | 60  | CA | B | 20  | CA | 28.91 | 1.0 |
| A | 60  | CA | B | 182 | CA | 17.88 | 1.0 |
| A | 60  | CA | B | 162 | CA | 31.05 | 1.0 |
| A | 151 | CA | B | 20  | CA | 44.4  | 1.0 |
| A | 151 | CA | B | 182 | CA | 14.3  | 1.0 |
| A | 151 | CA | B | 162 | CA | 35.66 | 1.0 |
| A | 12  | CA | B | 20  | CA | 42.7  | 1.0 |
| A | 12  | CA | B | 162 | CA | 32.37 | 1.0 |
| A | 12  | CA | B | 182 | CA | 33.23 | 1.0 |
| A | 128 | CA | B | 20  | CA | 45.84 | 1.0 |
| A | 128 | CA | B | 162 | CA | 53.45 | 1.0 |
| A | 128 | CA | B | 182 | CA | 38.04 | 1.0 |

1JMO

|   |     |    |   |     |    |       |     |
|---|-----|----|---|-----|----|-------|-----|
| A | 126 | CA | B | 170 | CA | 75.71 | 1.0 |
| A | 126 | CA | B | 237 | CA | 92.25 | 1.0 |
| A | 126 | CA | B | 442 | CA | 30.21 | 1.0 |
| A | 171 | CA | B | 170 | CA | 66.76 | 1.0 |
| A | 171 | CA | B | 237 | CA | 78.62 | 1.0 |
| A | 171 | CA | B | 442 | CA | 14.42 | 1.0 |
| A | 37  | CA | B | 170 | CA | 40.99 | 1.0 |
| A | 37  | CA | B | 237 | CA | 52.97 | 1.0 |
| A | 37  | CA | B | 442 | CA | 24.03 | 1.0 |
| A | 312 | CA | B | 170 | CA | 80.56 | 1.0 |
| A | 312 | CA | B | 237 | CA | 82.3  | 1.0 |

Restraint Sets

A 312 CA B 442 CA 37.5 1.0

1JPS

A 105 CA B 122 CA 66.1 1.0  
 A 105 CA B 184 CA 74.21 1.0  
 A 105 CA B 66 CA 32.79 1.0  
 A 78 CA B 122 CA 85.94 1.0  
 A 78 CA B 184 CA 96.33 1.0  
 A 78 CA B 66 CA 62.51 1.0  
 A 138 CA B 66 CA 38.5 1.0  
 A 138 CA B 122 CA 88.36 1.0  
 A 138 CA B 184 CA 95.41 1.0  
 A 180 CA B 66 CA 30.39 1.0  
 A 180 CA B 122 CA 70.76 1.0  
 A 180 CA B 184 CA 71.51 1.0

1JTG

A 6 CA B 85 CA 44.83 1.0  
 A 6 CA B 111 CA 18.64 1.0  
 A 6 CA B 286 CA 41.32 1.0  
 A 18 CA B 85 CA 42.16 1.0  
 A 18 CA B 111 CA 16.56 1.0  
 A 18 CA B 286 CA 44.87 1.0  
 A 94 CA B 85 CA 45.22 1.0  
 A 94 CA B 111 CA 25.32 1.0  
 A 94 CA B 286 CA 61.93 1.0  
 A 48 CA B 85 CA 32.88 1.0  
 A 48 CA B 111 CA 19.2 1.0  
 A 48 CA B 286 CA 28.62 1.0

1JWH

A 130 CA B 68 CA 73.29 1.0  
 A 130 CA B 170 CA 37.89 1.0  
 A 130 CA B 231 CA 97.31 1.0  
 A 252 CA B 68 CA 70.59 1.0  
 A 252 CA B 170 CA 50.68 1.0  
 A 252 CA B 231 CA 115.08 1.0  
 A 18 CA B 68 CA 60 1.0  
 A 18 CA B 170 CA 47.56 1.0  
 A 18 CA B 231 CA 104.68 1.0  
 A 59 CA B 68 CA 49.91 1.0  
 A 59 CA B 170 CA 22.46 1.0  
 A 59 CA B 231 CA 65.67 1.0

1JZD

A 16 CA B 1 CA 38.47 1.0  
 A 16 CA B 113 CA 35.39 1.0  
 A 16 CA B 413 CA 37.29 1.0  
 A 24 CA B 1 CA 54.99 1.0  
 A 24 CA B 113 CA 23.95 1.0  
 A 24 CA B 413 CA 55.83 1.0  
 A 93 CA B 1 CA 54.32 1.0  
 A 93 CA B 113 CA 17.37 1.0

Restraint Sets

|   |    |    |   |     |    |       |     |
|---|----|----|---|-----|----|-------|-----|
| A | 93 | CA | B | 413 | CA | 59.13 | 1.0 |
| A | 72 | CA | B | 1   | CA | 60.43 | 1.0 |
| A | 72 | CA | B | 113 | CA | 53.73 | 1.0 |
| A | 72 | CA | B | 413 | CA | 27.63 | 1.0 |

1K4C

|   |    |    |   |     |    |        |     |
|---|----|----|---|-----|----|--------|-----|
| A | 24 | CA | B | 190 | CA | 88.12  | 1.0 |
| A | 24 | CA | B | 484 | CA | 101.23 | 1.0 |
| A | 24 | CA | B | 366 | CA | 53.38  | 1.0 |
| A | 62 | CA | B | 190 | CA | 57.95  | 1.0 |
| A | 62 | CA | B | 484 | CA | 69.12  | 1.0 |
| A | 62 | CA | B | 366 | CA | 22.97  | 1.0 |
| A | 55 | CA | B | 190 | CA | 60.94  | 1.0 |
| A | 55 | CA | B | 366 | CA | 24.43  | 1.0 |
| A | 55 | CA | B | 484 | CA | 64.55  | 1.0 |
| A | 78 | CA | B | 190 | CA | 71.05  | 1.0 |
| A | 78 | CA | B | 366 | CA | 23.94  | 1.0 |
| A | 78 | CA | B | 484 | CA | 82.24  | 1.0 |

1K5D

|   |     |    |   |     |    |       |     |
|---|-----|----|---|-----|----|-------|-----|
| A | 19  | CA | B | 32  | CA | 49.27 | 1.0 |
| A | 19  | CA | B | 141 | CA | 49.68 | 1.0 |
| A | 19  | CA | B | 196 | CA | 61.81 | 1.0 |
| A | 154 | CA | B | 32  | CA | 50.24 | 1.0 |
| A | 154 | CA | B | 141 | CA | 56.53 | 1.0 |
| A | 154 | CA | B | 196 | CA | 55.44 | 1.0 |
| A | 318 | CA | B | 32  | CA | 52.82 | 1.0 |
| A | 318 | CA | B | 141 | CA | 27.88 | 1.0 |
| A | 318 | CA | B | 196 | CA | 75.65 | 1.0 |
| A | 108 | CA | B | 32  | CA | 22.49 | 1.0 |
| A | 108 | CA | B | 141 | CA | 38.13 | 1.0 |
| A | 108 | CA | B | 196 | CA | 34.58 | 1.0 |

1K74

|   |      |    |   |      |    |       |     |
|---|------|----|---|------|----|-------|-----|
| A | 230  | CA | B | 339  | CA | 49.17 | 1.0 |
| A | 230  | CA | B | 407  | CA | 38.98 | 1.0 |
| A | 230  | CA | B | 1131 | CA | 48.15 | 1.0 |
| A | 257  | CA | B | 339  | CA | 58.32 | 1.0 |
| A | 257  | CA | B | 407  | CA | 63.05 | 1.0 |
| A | 257  | CA | B | 1131 | CA | 53.8  | 1.0 |
| A | 1195 | CA | B | 339  | CA | 39.25 | 1.0 |
| A | 1195 | CA | B | 407  | CA | 44.61 | 1.0 |
| A | 1195 | CA | B | 1131 | CA | 58.21 | 1.0 |
| A | 458  | CA | B | 339  | CA | 28.8  | 1.0 |
| A | 458  | CA | B | 407  | CA | 52.27 | 1.0 |
| A | 458  | CA | B | 1131 | CA | 35.86 | 1.0 |

1KAC

|   |     |    |   |     |    |       |     |
|---|-----|----|---|-----|----|-------|-----|
| A | 130 | CA | B | 429 | CA | 17.38 | 1.0 |
| A | 130 | CA | B | 407 | CA | 19.73 | 1.0 |
| A | 130 | CA | B | 542 | CA | 34.41 | 1.0 |
| A | 139 | CA | B | 429 | CA | 29.97 | 1.0 |
| A | 139 | CA | B | 407 | CA | 47.08 | 1.0 |

Restraint Sets

|   |     |    |   |     |    |       |     |
|---|-----|----|---|-----|----|-------|-----|
| A | 139 | CA | B | 542 | CA | 40.7  | 1.0 |
| A | 65  | CA | B | 407 | CA | 43.19 | 1.0 |
| A | 65  | CA | B | 429 | CA | 24    | 1.0 |
| A | 65  | CA | B | 542 | CA | 30.05 | 1.0 |
| A | 126 | CA | B | 407 | CA | 19.83 | 1.0 |
| A | 126 | CA | B | 429 | CA | 17.81 | 1.0 |
| A | 126 | CA | B | 542 | CA | 36    | 1.0 |

1KKL

|   |    |    |   |     |    |       |     |
|---|----|----|---|-----|----|-------|-----|
| A | 52 | CA | B | 217 | CA | 22.85 | 1.0 |
| A | 52 | CA | B | 288 | CA | 35.84 | 1.0 |
| A | 52 | CA | B | 705 | CA | 60.66 | 1.0 |
| A | 70 | CA | B | 217 | CA | 41.23 | 1.0 |
| A | 70 | CA | B | 288 | CA | 43.08 | 1.0 |
| A | 70 | CA | B | 705 | CA | 63.06 | 1.0 |
| A | 11 | CA | B | 217 | CA | 36.72 | 1.0 |
| A | 11 | CA | B | 288 | CA | 53.27 | 1.0 |
| A | 11 | CA | B | 705 | CA | 67.38 | 1.0 |
| A | 30 | CA | B | 217 | CA | 36.05 | 1.0 |
| A | 30 | CA | B | 288 | CA | 39.12 | 1.0 |
| A | 30 | CA | B | 705 | CA | 54.9  | 1.0 |

1KLU

|   |     |    |   |     |    |       |     |
|---|-----|----|---|-----|----|-------|-----|
| A | 22  | CA | B | 50  | CA | 31.16 | 1.0 |
| A | 22  | CA | B | 76  | CA | 45.66 | 1.0 |
| A | 22  | CA | B | 336 | CA | 76.18 | 1.0 |
| A | 78  | CA | B | 50  | CA | 40.34 | 1.0 |
| A | 78  | CA | B | 76  | CA | 28.13 | 1.0 |
| A | 78  | CA | B | 336 | CA | 72.33 | 1.0 |
| A | 1   | CA | B | 50  | CA | 36.68 | 1.0 |
| A | 1   | CA | B | 76  | CA | 54.08 | 1.0 |
| A | 1   | CA | B | 336 | CA | 73.46 | 1.0 |
| A | 125 | CA | B | 50  | CA | 58.8  | 1.0 |
| A | 125 | CA | B | 76  | CA | 50.82 | 1.0 |
| A | 125 | CA | B | 336 | CA | 97.77 | 1.0 |

1KTZ

|   |     |    |   |     |    |       |     |
|---|-----|----|---|-----|----|-------|-----|
| A | 52  | CA | B | 28  | CA | 16.79 | 1.0 |
| A | 52  | CA | B | 96  | CA | 8.98  | 1.0 |
| A | 52  | CA | B | 111 | CA | 41.18 | 1.0 |
| A | 34  | CA | B | 28  | CA | 29.73 | 1.0 |
| A | 34  | CA | B | 96  | CA | 17.69 | 1.0 |
| A | 34  | CA | B | 111 | CA | 53.99 | 1.0 |
| A | 130 | CA | B | 28  | CA | 32.21 | 1.0 |
| A | 130 | CA | B | 96  | CA | 37.21 | 1.0 |
| A | 130 | CA | B | 111 | CA | 58.37 | 1.0 |
| A | 82  | CA | B | 28  | CA | 32.69 | 1.0 |
| A | 82  | CA | B | 96  | CA | 25.37 | 1.0 |
| A | 82  | CA | B | 111 | CA | 57.08 | 1.0 |

1KXP

|   |    |    |   |     |    |       |     |
|---|----|----|---|-----|----|-------|-----|
| A | 83 | CA | B | 60  | CA | 88.47 | 1.0 |
| A | 83 | CA | B | 230 | CA | 79    | 1.0 |

Restraint Sets

|   |     |    |   |     |    |       |     |
|---|-----|----|---|-----|----|-------|-----|
| A | 83  | CA | B | 360 | CA | 67.7  | 1.0 |
| A | 195 | CA | B | 60  | CA | 41.45 | 1.0 |
| A | 195 | CA | B | 230 | CA | 43.39 | 1.0 |
| A | 195 | CA | B | 360 | CA | 34.83 | 1.0 |
| A | 322 | CA | B | 60  | CA | 58.44 | 1.0 |
| A | 322 | CA | B | 230 | CA | 58.17 | 1.0 |
| A | 322 | CA | B | 360 | CA | 45.97 | 1.0 |
| A | 435 | CA | B | 60  | CA | 58.73 | 1.0 |
| A | 435 | CA | B | 230 | CA | 34.55 | 1.0 |
| A | 435 | CA | B | 360 | CA | 66.77 | 1.0 |

1KXQ

|   |     |    |   |     |    |       |     |
|---|-----|----|---|-----|----|-------|-----|
| A | 68  | CA | B | 30  | CA | 48.7  | 1.0 |
| A | 68  | CA | B | 173 | CA | 35.11 | 1.0 |
| A | 68  | CA | B | 437 | CA | 61.89 | 1.0 |
| A | 12  | CA | B | 30  | CA | 68.94 | 1.0 |
| A | 12  | CA | B | 173 | CA | 53.62 | 1.0 |
| A | 12  | CA | B | 437 | CA | 75.67 | 1.0 |
| A | 1   | CA | B | 30  | CA | 41.16 | 1.0 |
| A | 1   | CA | B | 173 | CA | 48.87 | 1.0 |
| A | 1   | CA | B | 437 | CA | 45.64 | 1.0 |
| A | 103 | CA | B | 30  | CA | 48.64 | 1.0 |
| A | 103 | CA | B | 173 | CA | 34.56 | 1.0 |
| A | 103 | CA | B | 437 | CA | 50.81 | 1.0 |

1LFD

|   |    |    |   |     |    |       |     |
|---|----|----|---|-----|----|-------|-----|
| A | 43 | CA | B | 224 | CA | 29.13 | 1.0 |
| A | 43 | CA | B | 303 | CA | 39.69 | 1.0 |
| A | 43 | CA | B | 328 | CA | 50.22 | 1.0 |
| A | 51 | CA | B | 224 | CA | 18.57 | 1.0 |
| A | 51 | CA | B | 303 | CA | 33.88 | 1.0 |
| A | 51 | CA | B | 328 | CA | 39.2  | 1.0 |
| A | 71 | CA | B | 224 | CA | 26.15 | 1.0 |
| A | 71 | CA | B | 303 | CA | 32.86 | 1.0 |
| A | 71 | CA | B | 328 | CA | 51.52 | 1.0 |
| A | 14 | CA | B | 224 | CA | 35.13 | 1.0 |
| A | 14 | CA | B | 303 | CA | 30.67 | 1.0 |
| A | 14 | CA | B | 328 | CA | 45.94 | 1.0 |

1M10

|   |     |    |   |     |    |       |     |
|---|-----|----|---|-----|----|-------|-----|
| A | 214 | CA | B | 527 | CA | 44.16 | 1.0 |
| A | 214 | CA | B | 574 | CA | 50.33 | 1.0 |
| A | 214 | CA | B | 634 | CA | 30.51 | 1.0 |
| A | 221 | CA | B | 527 | CA | 35.96 | 1.0 |
| A | 221 | CA | B | 574 | CA | 44.16 | 1.0 |
| A | 221 | CA | B | 634 | CA | 20.83 | 1.0 |
| A | 31  | CA | B | 527 | CA | 52.8  | 1.0 |
| A | 31  | CA | B | 574 | CA | 30.33 | 1.0 |
| A | 31  | CA | B | 634 | CA | 45.67 | 1.0 |
| A | 19  | CA | B | 527 | CA | 39.53 | 1.0 |
| A | 19  | CA | B | 574 | CA | 18.88 | 1.0 |
| A | 19  | CA | B | 634 | CA | 42.65 | 1.0 |

## Restraint Sets

### 1MAH

|   |    |    |   |     |    |       |     |
|---|----|----|---|-----|----|-------|-----|
| A | 4  | CA | B | 220 | CA | 48.69 | 1.0 |
| A | 4  | CA | B | 268 | CA | 39.26 | 1.0 |
| A | 4  | CA | B | 468 | CA | 38.88 | 1.0 |
| A | 15 | CA | B | 220 | CA | 52    | 1.0 |
| A | 15 | CA | B | 268 | CA | 41.22 | 1.0 |
| A | 15 | CA | B | 468 | CA | 42.3  | 1.0 |
| A | 45 | CA | B | 220 | CA | 49.66 | 1.0 |
| A | 45 | CA | B | 268 | CA | 28.88 | 1.0 |
| A | 45 | CA | B | 468 | CA | 51.61 | 1.0 |
| A | 31 | CA | B | 220 | CA | 38.07 | 1.0 |
| A | 31 | CA | B | 268 | CA | 31.33 | 1.0 |
| A | 31 | CA | B | 468 | CA | 37.49 | 1.0 |

### 1MLO

|   |    |    |   |     |    |       |     |
|---|----|----|---|-----|----|-------|-----|
| A | 58 | CA | B | 29  | CA | 55.74 | 1.0 |
| A | 58 | CA | B | 457 | CA | 27.52 | 1.0 |
| A | 58 | CA | B | 630 | CA | 64.82 | 1.0 |
| A | 68 | CA | B | 29  | CA | 66.45 | 1.0 |
| A | 68 | CA | B | 457 | CA | 38.67 | 1.0 |
| A | 68 | CA | B | 630 | CA | 77.25 | 1.0 |
| A | 35 | CA | B | 29  | CA | 46.02 | 1.0 |
| A | 35 | CA | B | 457 | CA | 52.65 | 1.0 |
| A | 35 | CA | B | 630 | CA | 71.08 | 1.0 |
| A | 47 | CA | B | 29  | CA | 63.66 | 1.0 |
| A | 47 | CA | B | 457 | CA | 44.73 | 1.0 |
| A | 47 | CA | B | 630 | CA | 67.85 | 1.0 |

### 1MLC

|   |    |    |   |     |    |       |     |
|---|----|----|---|-----|----|-------|-----|
| A | 6  | CA | B | 123 | CA | 82.74 | 1.0 |
| A | 6  | CA | B | 187 | CA | 87.62 | 1.0 |
| A | 6  | CA | B | 66  | CA | 51.39 | 1.0 |
| A | 99 | CA | B | 123 | CA | 83.91 | 1.0 |
| A | 99 | CA | B | 187 | CA | 88.82 | 1.0 |
| A | 99 | CA | B | 66  | CA | 37.11 | 1.0 |
| A | 67 | CA | B | 66  | CA | 23.84 | 1.0 |
| A | 67 | CA | B | 123 | CA | 62.01 | 1.0 |
| A | 67 | CA | B | 187 | CA | 68.45 | 1.0 |
| A | 47 | CA | B | 66  | CA | 18.92 | 1.0 |
| A | 47 | CA | B | 123 | CA | 63.85 | 1.0 |
| A | 47 | CA | B | 187 | CA | 66.72 | 1.0 |

### 1MQ8

|   |     |    |   |     |    |       |     |
|---|-----|----|---|-----|----|-------|-----|
| A | 146 | CA | B | 10  | CA | 25.35 | 1.0 |
| A | 146 | CA | B | 67  | CA | 24.92 | 1.0 |
| A | 146 | CA | B | 181 | CA | 48.51 | 1.0 |
| A | 217 | CA | B | 10  | CA | 44    | 1.0 |
| A | 217 | CA | B | 67  | CA | 24.85 | 1.0 |
| A | 217 | CA | B | 181 | CA | 74.32 | 1.0 |
| A | 189 | CA | B | 10  | CA | 46.88 | 1.0 |
| A | 189 | CA | B | 67  | CA | 40.65 | 1.0 |
| A | 189 | CA | B | 181 | CA | 64.29 | 1.0 |
| A | 267 | CA | B | 10  | CA | 30.48 | 1.0 |



Restraint Sets

|   |     |    |   |     |    |       |     |
|---|-----|----|---|-----|----|-------|-----|
| A | 267 | CA | B | 67  | CA | 21.97 | 1.0 |
| A | 267 | CA | B | 181 | CA | 59.66 | 1.0 |

1N2C

|   |     |    |   |      |    |        |     |
|---|-----|----|---|------|----|--------|-----|
| A | 173 | CA | B | 319  | CA | 77.27  | 1.0 |
| A | 173 | CA | B | 670  | CA | 10.97  | 1.0 |
| A | 173 | CA | B | 1389 | CA | 115.46 | 1.0 |
| A | 229 | CA | B | 319  | CA | 97.05  | 1.0 |
| A | 229 | CA | B | 670  | CA | 49.24  | 1.0 |
| A | 229 | CA | B | 1389 | CA | 125.03 | 1.0 |
| A | 533 | CA | B | 319  | CA | 84.11  | 1.0 |
| A | 533 | CA | B | 670  | CA | 58.09  | 1.0 |
| A | 533 | CA | B | 1389 | CA | 144.64 | 1.0 |
| A | 474 | CA | B | 319  | CA | 55.18  | 1.0 |
| A | 474 | CA | B | 670  | CA | 49.05  | 1.0 |
| A | 474 | CA | B | 1389 | CA | 102.1  | 1.0 |

1N8O

|   |    |    |   |     |    |       |     |
|---|----|----|---|-----|----|-------|-----|
| A | 7  | CA | B | 472 | CA | 34.66 | 1.0 |
| A | 7  | CA | B | 544 | CA | 61.32 | 1.0 |
| A | 7  | CA | B | 121 | CA | 60.65 | 1.0 |
| A | 35 | CA | B | 472 | CA | 33.67 | 1.0 |
| A | 35 | CA | B | 544 | CA | 43.01 | 1.0 |
| A | 35 | CA | B | 121 | CA | 58.22 | 1.0 |
| A | 76 | CA | B | 121 | CA | 36.65 | 1.0 |
| A | 76 | CA | B | 472 | CA | 11.76 | 1.0 |
| A | 76 | CA | B | 544 | CA | 45.45 | 1.0 |
| A | 89 | CA | B | 121 | CA | 25.75 | 1.0 |
| A | 89 | CA | B | 472 | CA | 29.33 | 1.0 |
| A | 89 | CA | B | 544 | CA | 38.55 | 1.0 |

1NCA

|   |     |    |   |     |    |       |     |
|---|-----|----|---|-----|----|-------|-----|
| A | 105 | CA | B | 66  | CA | 37.31 | 1.0 |
| A | 105 | CA | B | 208 | CA | 82.14 | 1.0 |
| A | 105 | CA | B | 371 | CA | 31.54 | 1.0 |
| A | 143 | CA | B | 66  | CA | 35.23 | 1.0 |
| A | 143 | CA | B | 208 | CA | 79.96 | 1.0 |
| A | 143 | CA | B | 371 | CA | 38.88 | 1.0 |
| A | 329 | CA | B | 66  | CA | 20.91 | 1.0 |
| A | 329 | CA | B | 208 | CA | 59.61 | 1.0 |
| A | 329 | CA | B | 371 | CA | 28.64 | 1.0 |
| A | 266 | CA | B | 66  | CA | 36.5  | 1.0 |
| A | 266 | CA | B | 208 | CA | 89.28 | 1.0 |
| A | 266 | CA | B | 371 | CA | 57.65 | 1.0 |

1NSN

|   |     |    |   |     |    |       |     |
|---|-----|----|---|-----|----|-------|-----|
| A | 56  | CA | B | 123 | CA | 73.52 | 1.0 |
| A | 56  | CA | B | 187 | CA | 81.02 | 1.0 |
| A | 56  | CA | B | 66  | CA | 20.79 | 1.0 |
| A | 133 | CA | B | 123 | CA | 62.13 | 1.0 |
| A | 133 | CA | B | 187 | CA | 72.19 | 1.0 |
| A | 133 | CA | B | 66  | CA | 27.36 | 1.0 |
| A | 116 | CA | B | 66  | CA | 44.7  | 1.0 |

Restraint Sets

|   |     |    |   |     |    |       |     |
|---|-----|----|---|-----|----|-------|-----|
| A | 116 | CA | B | 123 | CA | 76.35 | 1.0 |
| A | 116 | CA | B | 187 | CA | 87.6  | 1.0 |
| A | 70  | CA | B | 66  | CA | 25.88 | 1.0 |
| A | 70  | CA | B | 123 | CA | 62.77 | 1.0 |
| A | 70  | CA | B | 187 | CA | 70.03 | 1.0 |

1NW9

|   |     |    |   |     |    |       |     |
|---|-----|----|---|-----|----|-------|-----|
| A | 265 | CA | B | 143 | CA | 47.1  | 1.0 |
| A | 265 | CA | B | 221 | CA | 45.86 | 1.0 |
| A | 265 | CA | B | 392 | CA | 32.58 | 1.0 |
| A | 270 | CA | B | 143 | CA | 50.13 | 1.0 |
| A | 270 | CA | B | 221 | CA | 48.1  | 1.0 |
| A | 270 | CA | B | 392 | CA | 39.89 | 1.0 |
| A | 346 | CA | B | 143 | CA | 18.85 | 1.0 |
| A | 346 | CA | B | 221 | CA | 30.34 | 1.0 |
| A | 346 | CA | B | 392 | CA | 19.82 | 1.0 |
| A | 326 | CA | B | 143 | CA | 34.48 | 1.0 |
| A | 326 | CA | B | 221 | CA | 27.94 | 1.0 |
| A | 326 | CA | B | 392 | CA | 20.02 | 1.0 |

1OC0

|   |    |    |   |     |    |       |     |
|---|----|----|---|-----|----|-------|-----|
| A | 38 | CA | B | 71  | CA | 28.62 | 1.0 |
| A | 38 | CA | B | 129 | CA | 30.34 | 1.0 |
| A | 38 | CA | B | 270 | CA | 55.03 | 1.0 |
| A | 16 | CA | B | 71  | CA | 34.84 | 1.0 |
| A | 16 | CA | B | 129 | CA | 24.15 | 1.0 |
| A | 16 | CA | B | 270 | CA | 67.94 | 1.0 |
| A | 27 | CA | B | 71  | CA | 33.25 | 1.0 |
| A | 27 | CA | B | 129 | CA | 13.84 | 1.0 |
| A | 27 | CA | B | 270 | CA | 54.98 | 1.0 |
| A | 11 | CA | B | 71  | CA | 23.06 | 1.0 |
| A | 11 | CA | B | 129 | CA | 24.8  | 1.0 |
| A | 11 | CA | B | 270 | CA | 56.95 | 1.0 |

1OFU

|   |     |    |   |     |    |       |     |
|---|-----|----|---|-----|----|-------|-----|
| A | 32  | CA | B | 94  | CA | 37.63 | 1.0 |
| A | 32  | CA | B | 123 | CA | 31.35 | 1.0 |
| A | 32  | CA | B | 322 | CA | 65.07 | 1.0 |
| A | 66  | CA | B | 94  | CA | 53.93 | 1.0 |
| A | 66  | CA | B | 123 | CA | 58.58 | 1.0 |
| A | 66  | CA | B | 322 | CA | 81.67 | 1.0 |
| A | 175 | CA | B | 94  | CA | 52.24 | 1.0 |
| A | 175 | CA | B | 123 | CA | 39.2  | 1.0 |
| A | 175 | CA | B | 322 | CA | 82.86 | 1.0 |
| A | 274 | CA | B | 94  | CA | 24.9  | 1.0 |
| A | 274 | CA | B | 123 | CA | 14.38 | 1.0 |
| A | 274 | CA | B | 322 | CA | 51.34 | 1.0 |

1OPH

|   |     |    |   |     |    |       |     |
|---|-----|----|---|-----|----|-------|-----|
| A | 171 | CA | B | 44  | CA | 55.71 | 1.0 |
| A | 171 | CA | B | 128 | CA | 66.17 | 1.0 |
| A | 171 | CA | B | 356 | CA | 14.41 | 1.0 |
| A | 243 | CA | B | 44  | CA | 62.03 | 1.0 |

Restraint Sets

|   |     |    |   |     |    |       |     |
|---|-----|----|---|-----|----|-------|-----|
| A | 243 | CA | B | 128 | CA | 86.32 | 1.0 |
| A | 243 | CA | B | 356 | CA | 33.01 | 1.0 |
| A | 202 | CA | B | 44  | CA | 68.91 | 1.0 |
| A | 202 | CA | B | 128 | CA | 89.2  | 1.0 |
| A | 202 | CA | B | 356 | CA | 28.37 | 1.0 |
| A | 38  | CA | B | 44  | CA | 40.35 | 1.0 |
| A | 38  | CA | B | 128 | CA | 72.04 | 1.0 |
| A | 38  | CA | B | 356 | CA | 22.63 | 1.0 |

1OYV

|   |    |    |   |     |    |       |     |
|---|----|----|---|-----|----|-------|-----|
| A | 60 | CA | B | 7   | CA | 23.49 | 1.0 |
| A | 60 | CA | B | 18  | CA | 35.69 | 1.0 |
| A | 60 | CA | B | 133 | CA | 18.05 | 1.0 |
| A | 3  | CA | B | 7   | CA | 50.36 | 1.0 |
| A | 3  | CA | B | 18  | CA | 63    | 1.0 |
| A | 3  | CA | B | 133 | CA | 31.11 | 1.0 |
| A | 24 | CA | B | 7   | CA | 24.82 | 1.0 |
| A | 24 | CA | B | 18  | CA | 40.57 | 1.0 |
| A | 24 | CA | B | 133 | CA | 37.05 | 1.0 |
| A | 46 | CA | B | 7   | CA | 33.43 | 1.0 |
| A | 46 | CA | B | 18  | CA | 48.17 | 1.0 |
| A | 46 | CA | B | 133 | CA | 36.11 | 1.0 |

1PPE

|   |    |    |   |     |    |       |     |
|---|----|----|---|-----|----|-------|-----|
| A | 4  | CA | B | 165 | CA | 19.83 | 1.0 |
| A | 4  | CA | B | 243 | CA | 29.23 | 1.0 |
| A | 4  | CA | B | 20  | CA | 22.48 | 1.0 |
| A | 15 | CA | B | 165 | CA | 32.18 | 1.0 |
| A | 15 | CA | B | 243 | CA | 37.01 | 1.0 |
| A | 15 | CA | B | 20  | CA | 31.31 | 1.0 |
| A | 25 | CA | B | 20  | CA | 23.8  | 1.0 |
| A | 25 | CA | B | 165 | CA | 34.6  | 1.0 |
| A | 25 | CA | B | 243 | CA | 42.86 | 1.0 |
| A | 1  | CA | B | 20  | CA | 26.89 | 1.0 |
| A | 1  | CA | B | 165 | CA | 18.46 | 1.0 |
| A | 1  | CA | B | 243 | CA | 37.12 | 1.0 |

1PVH

|   |     |    |   |     |    |       |     |
|---|-----|----|---|-----|----|-------|-----|
| A | 109 | CA | B | 198 | CA | 25.38 | 1.0 |
| A | 109 | CA | B | 184 | CA | 43.66 | 1.0 |
| A | 109 | CA | B | 208 | CA | 35.34 | 1.0 |
| A | 135 | CA | B | 198 | CA | 28.52 | 1.0 |
| A | 135 | CA | B | 184 | CA | 32.99 | 1.0 |
| A | 135 | CA | B | 208 | CA | 52.95 | 1.0 |
| A | 153 | CA | B | 184 | CA | 54.57 | 1.0 |
| A | 153 | CA | B | 198 | CA | 43.38 | 1.0 |
| A | 153 | CA | B | 208 | CA | 55.8  | 1.0 |
| A | 58  | CA | B | 184 | CA | 61.78 | 1.0 |
| A | 58  | CA | B | 198 | CA | 42    | 1.0 |
| A | 58  | CA | B | 208 | CA | 47.61 | 1.0 |

1PXV

|   |    |    |   |     |    |       |     |
|---|----|----|---|-----|----|-------|-----|
| A | 18 | CA | B | 256 | CA | 55.41 | 1.0 |
|---|----|----|---|-----|----|-------|-----|

Restraint Sets

|   |     |    |   |     |    |       |     |
|---|-----|----|---|-----|----|-------|-----|
| A | 18  | CA | B | 270 | CA | 44.69 | 1.0 |
| A | 18  | CA | B | 223 | CA | 52.61 | 1.0 |
| A | 106 | CA | B | 256 | CA | 41.11 | 1.0 |
| A | 106 | CA | B | 270 | CA | 33.92 | 1.0 |
| A | 106 | CA | B | 223 | CA | 43.58 | 1.0 |
| A | 97  | CA | B | 223 | CA | 34.72 | 1.0 |
| A | 97  | CA | B | 256 | CA | 24.14 | 1.0 |
| A | 97  | CA | B | 270 | CA | 13.38 | 1.0 |
| A | 48  | CA | B | 223 | CA | 63.78 | 1.0 |
| A | 48  | CA | B | 256 | CA | 54.6  | 1.0 |
| A | 48  | CA | B | 270 | CA | 37.63 | 1.0 |

1QA9

|   |    |    |   |     |    |       |     |
|---|----|----|---|-----|----|-------|-----|
| A | 87 | CA | B | 8   | CA | 28.74 | 1.0 |
| A | 87 | CA | B | 102 | CA | 33.51 | 1.0 |
| A | 87 | CA | B | 31  | CA | 24.32 | 1.0 |
| A | 92 | CA | B | 8   | CA | 40.55 | 1.0 |
| A | 92 | CA | B | 102 | CA | 47.42 | 1.0 |
| A | 92 | CA | B | 31  | CA | 30.15 | 1.0 |
| A | 47 | CA | B | 8   | CA | 34.86 | 1.0 |
| A | 47 | CA | B | 31  | CA | 13.94 | 1.0 |
| A | 47 | CA | B | 102 | CA | 40.93 | 1.0 |
| A | 21 | CA | B | 8   | CA | 38.04 | 1.0 |
| A | 21 | CA | B | 31  | CA | 28.56 | 1.0 |
| A | 21 | CA | B | 102 | CA | 37.73 | 1.0 |

1QFW

|   |     |    |   |     |    |       |     |
|---|-----|----|---|-----|----|-------|-----|
| A | 44  | CA | B | 671 | CA | 23.53 | 1.0 |
| A | 44  | CA | B | 612 | CA | 39.1  | 1.0 |
| A | 44  | CA | B | 258 | CA | 22.53 | 1.0 |
| A | 68  | CA | B | 671 | CA | 57.78 | 1.0 |
| A | 68  | CA | B | 612 | CA | 65.37 | 1.0 |
| A | 68  | CA | B | 258 | CA | 68.99 | 1.0 |
| A | 211 | CA | B | 258 | CA | 25.96 | 1.0 |
| A | 211 | CA | B | 612 | CA | 52.69 | 1.0 |
| A | 211 | CA | B | 671 | CA | 34.29 | 1.0 |
| A | 163 | CA | B | 258 | CA | 33.33 | 1.0 |
| A | 163 | CA | B | 612 | CA | 34.83 | 1.0 |
| A | 163 | CA | B | 671 | CA | 14.99 | 1.0 |

1R0R

|   |    |    |   |     |    |       |     |
|---|----|----|---|-----|----|-------|-----|
| A | 34 | CA | B | 7   | CA | 25.94 | 1.0 |
| A | 34 | CA | B | 18  | CA | 39.81 | 1.0 |
| A | 34 | CA | B | 133 | CA | 25.93 | 1.0 |
| A | 43 | CA | B | 7   | CA | 36.99 | 1.0 |
| A | 43 | CA | B | 18  | CA | 50.51 | 1.0 |
| A | 43 | CA | B | 133 | CA | 22.32 | 1.0 |
| A | 14 | CA | B | 7   | CA | 29.63 | 1.0 |
| A | 14 | CA | B | 18  | CA | 41.31 | 1.0 |
| A | 14 | CA | B | 133 | CA | 13.79 | 1.0 |
| A | 9  | CA | B | 7   | CA | 36.7  | 1.0 |
| A | 9  | CA | B | 18  | CA | 49    | 1.0 |
| A | 9  | CA | B | 133 | CA | 26.81 | 1.0 |

## Restraint Sets

### 1R6Q

|   |    |    |   |     |    |       |     |
|---|----|----|---|-----|----|-------|-----|
| A | 55 | CA | B | 4   | CA | 45.86 | 1.0 |
| A | 55 | CA | B | 19  | CA | 27.39 | 1.0 |
| A | 55 | CA | B | 140 | CA | 58.62 | 1.0 |
| A | 68 | CA | B | 4   | CA | 52.72 | 1.0 |
| A | 68 | CA | B | 19  | CA | 39.64 | 1.0 |
| A | 68 | CA | B | 140 | CA | 58.58 | 1.0 |
| A | 20 | CA | B | 4   | CA | 39    | 1.0 |
| A | 20 | CA | B | 19  | CA | 39.86 | 1.0 |
| A | 20 | CA | B | 140 | CA | 27.95 | 1.0 |
| A | 94 | CA | B | 4   | CA | 36.7  | 1.0 |
| A | 94 | CA | B | 19  | CA | 29.48 | 1.0 |
| A | 94 | CA | B | 140 | CA | 49.35 | 1.0 |

### 1R8S

|   |     |    |   |     |    |       |     |
|---|-----|----|---|-----|----|-------|-----|
| A | 74  | CA | B | 40  | CA | 26.9  | 1.0 |
| A | 74  | CA | B | 81  | CA | 36.96 | 1.0 |
| A | 74  | CA | B | 136 | CA | 38.78 | 1.0 |
| A | 85  | CA | B | 40  | CA | 42.67 | 1.0 |
| A | 85  | CA | B | 81  | CA | 47.58 | 1.0 |
| A | 85  | CA | B | 136 | CA | 47.33 | 1.0 |
| A | 219 | CA | B | 40  | CA | 38.44 | 1.0 |
| A | 219 | CA | B | 81  | CA | 13.44 | 1.0 |
| A | 219 | CA | B | 136 | CA | 39.07 | 1.0 |
| A | 240 | CA | B | 40  | CA | 31.48 | 1.0 |
| A | 240 | CA | B | 81  | CA | 21.12 | 1.0 |
| A | 240 | CA | B | 136 | CA | 47.66 | 1.0 |

### 1RLB

|   |     |    |   |     |    |       |     |
|---|-----|----|---|-----|----|-------|-----|
| A | 147 | CA | B | 76  | CA | 71.86 | 1.0 |
| A | 147 | CA | B | 281 | CA | 40.66 | 1.0 |
| A | 147 | CA | B | 681 | CA | 82.28 | 1.0 |
| A | 78  | CA | B | 76  | CA | 46.91 | 1.0 |
| A | 78  | CA | B | 281 | CA | 26.8  | 1.0 |
| A | 78  | CA | B | 681 | CA | 65.17 | 1.0 |
| A | 94  | CA | B | 76  | CA | 34.93 | 1.0 |
| A | 94  | CA | B | 281 | CA | 18.12 | 1.0 |
| A | 94  | CA | B | 681 | CA | 46.1  | 1.0 |
| A | 34  | CA | B | 76  | CA | 41.6  | 1.0 |
| A | 34  | CA | B | 281 | CA | 7.89  | 1.0 |
| A | 34  | CA | B | 681 | CA | 52.53 | 1.0 |

### 1RV6

|   |     |    |   |     |    |       |     |
|---|-----|----|---|-----|----|-------|-----|
| A | 145 | CA | B | 46  | CA | 23.96 | 1.0 |
| A | 145 | CA | B | 225 | CA | 13.32 | 1.0 |
| A | 145 | CA | B | 244 | CA | 45.88 | 1.0 |
| A | 215 | CA | B | 46  | CA | 36.87 | 1.0 |
| A | 215 | CA | B | 225 | CA | 19.46 | 1.0 |
| A | 215 | CA | B | 244 | CA | 50.7  | 1.0 |
| A | 161 | CA | B | 46  | CA | 43.6  | 1.0 |
| A | 161 | CA | B | 225 | CA | 27.2  | 1.0 |
| A | 161 | CA | B | 244 | CA | 61.65 | 1.0 |

Restraint Sets

|   |     |    |   |     |    |       |     |
|---|-----|----|---|-----|----|-------|-----|
| A | 200 | CA | B | 46  | CA | 28.9  | 1.0 |
| A | 200 | CA | B | 225 | CA | 21.1  | 1.0 |
| A | 200 | CA | B | 244 | CA | 36.88 | 1.0 |

1S1Q

|   |    |    |   |     |    |       |     |
|---|----|----|---|-----|----|-------|-----|
| A | 23 | CA | B | 5   | CA | 38.54 | 1.0 |
| A | 23 | CA | B | 10  | CA | 34.55 | 1.0 |
| A | 23 | CA | B | 137 | CA | 35.36 | 1.0 |
| A | 34 | CA | B | 5   | CA | 49.99 | 1.0 |
| A | 34 | CA | B | 10  | CA | 44.88 | 1.0 |
| A | 34 | CA | B | 137 | CA | 42.66 | 1.0 |
| A | 63 | CA | B | 5   | CA | 39.75 | 1.0 |
| A | 63 | CA | B | 10  | CA | 38.37 | 1.0 |
| A | 63 | CA | B | 137 | CA | 23.26 | 1.0 |
| A | 47 | CA | B | 5   | CA | 25.91 | 1.0 |
| A | 47 | CA | B | 10  | CA | 22.03 | 1.0 |
| A | 47 | CA | B | 137 | CA | 27.64 | 1.0 |

1SBB

|   |     |    |   |     |    |        |     |
|---|-----|----|---|-----|----|--------|-----|
| A | 211 | CA | B | 13  | CA | 38.69  | 1.0 |
| A | 211 | CA | B | 246 | CA | 77.09  | 1.0 |
| A | 211 | CA | B | 48  | CA | 18.5   | 1.0 |
| A | 37  | CA | B | 13  | CA | 49.86  | 1.0 |
| A | 37  | CA | B | 246 | CA | 85.62  | 1.0 |
| A | 37  | CA | B | 48  | CA | 38.18  | 1.0 |
| A | 239 | CA | B | 13  | CA | 32.07  | 1.0 |
| A | 239 | CA | B | 48  | CA | 29.88  | 1.0 |
| A | 239 | CA | B | 246 | CA | 80.34  | 1.0 |
| A | 193 | CA | B | 13  | CA | 58.03  | 1.0 |
| A | 193 | CA | B | 48  | CA | 46.36  | 1.0 |
| A | 193 | CA | B | 246 | CA | 103.99 | 1.0 |

1SYX

|   |    |    |   |     |    |       |     |
|---|----|----|---|-----|----|-------|-----|
| A | 47 | CA | B | 11  | CA | 42.41 | 1.0 |
| A | 47 | CA | B | 36  | CA | 42.58 | 1.0 |
| A | 47 | CA | B | 124 | CA | 18.08 | 1.0 |
| A | 54 | CA | B | 11  | CA | 44.79 | 1.0 |
| A | 54 | CA | B | 36  | CA | 43.81 | 1.0 |
| A | 54 | CA | B | 124 | CA | 22.62 | 1.0 |
| A | 60 | CA | B | 11  | CA | 45.35 | 1.0 |
| A | 60 | CA | B | 36  | CA | 38.12 | 1.0 |
| A | 60 | CA | B | 124 | CA | 28.14 | 1.0 |
| A | 31 | CA | B | 11  | CA | 47.08 | 1.0 |
| A | 31 | CA | B | 36  | CA | 37.57 | 1.0 |
| A | 31 | CA | B | 124 | CA | 29.1  | 1.0 |

1T6B

|   |     |    |   |     |    |        |     |
|---|-----|----|---|-----|----|--------|-----|
| A | 72  | CA | B | 568 | CA | 90.91  | 1.0 |
| A | 72  | CA | B | 732 | CA | 39.24  | 1.0 |
| A | 72  | CA | B | 76  | CA | 123.78 | 1.0 |
| A | 111 | CA | B | 568 | CA | 70.84  | 1.0 |
| A | 111 | CA | B | 732 | CA | 19.36  | 1.0 |
| A | 111 | CA | B | 76  | CA | 108.2  | 1.0 |

Restraint Sets

|   |     |    |   |     |    |        |     |
|---|-----|----|---|-----|----|--------|-----|
| A | 154 | CA | B | 76  | CA | 90.12  | 1.0 |
| A | 154 | CA | B | 568 | CA | 68.85  | 1.0 |
| A | 154 | CA | B | 732 | CA | 37.08  | 1.0 |
| A | 133 | CA | B | 76  | CA | 112.87 | 1.0 |
| A | 133 | CA | B | 568 | CA | 77.43  | 1.0 |
| A | 133 | CA | B | 732 | CA | 45.58  | 1.0 |

1TMQ

|   |     |    |   |     |    |       |     |
|---|-----|----|---|-----|----|-------|-----|
| A | 538 | CA | B | 29  | CA | 58.51 | 1.0 |
| A | 538 | CA | B | 162 | CA | 53.05 | 1.0 |
| A | 538 | CA | B | 412 | CA | 61.2  | 1.0 |
| A | 554 | CA | B | 29  | CA | 35.88 | 1.0 |
| A | 554 | CA | B | 162 | CA | 29.97 | 1.0 |
| A | 554 | CA | B | 412 | CA | 48.96 | 1.0 |
| A | 572 | CA | B | 29  | CA | 49.5  | 1.0 |
| A | 572 | CA | B | 162 | CA | 35.64 | 1.0 |
| A | 572 | CA | B | 412 | CA | 48.68 | 1.0 |
| A | 588 | CA | B | 29  | CA | 60.71 | 1.0 |
| A | 588 | CA | B | 162 | CA | 40.03 | 1.0 |
| A | 588 | CA | B | 412 | CA | 67.69 | 1.0 |

1UDI

|   |    |    |   |     |    |       |     |
|---|----|----|---|-----|----|-------|-----|
| A | 27 | CA | B | 20  | CA | 44.47 | 1.0 |
| A | 27 | CA | B | 56  | CA | 35    | 1.0 |
| A | 27 | CA | B | 233 | CA | 35.43 | 1.0 |
| A | 21 | CA | B | 20  | CA | 34.92 | 1.0 |
| A | 21 | CA | B | 56  | CA | 21.42 | 1.0 |
| A | 21 | CA | B | 233 | CA | 35.37 | 1.0 |
| A | 49 | CA | B | 20  | CA | 47.36 | 1.0 |
| A | 49 | CA | B | 56  | CA | 34.48 | 1.0 |
| A | 49 | CA | B | 233 | CA | 39.83 | 1.0 |
| A | 63 | CA | B | 20  | CA | 35.22 | 1.0 |
| A | 63 | CA | B | 56  | CA | 18.06 | 1.0 |
| A | 63 | CA | B | 233 | CA | 45.21 | 1.0 |

1US7

|   |     |    |   |     |    |       |     |
|---|-----|----|---|-----|----|-------|-----|
| A | 149 | CA | B | 10  | CA | 40.38 | 1.0 |
| A | 149 | CA | B | 51  | CA | 53.58 | 1.0 |
| A | 149 | CA | B | 187 | CA | 51.53 | 1.0 |
| A | 199 | CA | B | 10  | CA | 22.74 | 1.0 |
| A | 199 | CA | B | 51  | CA | 44.88 | 1.0 |
| A | 199 | CA | B | 187 | CA | 48.87 | 1.0 |
| A | 245 | CA | B | 10  | CA | 37.39 | 1.0 |
| A | 245 | CA | B | 51  | CA | 17.48 | 1.0 |
| A | 245 | CA | B | 187 | CA | 40.45 | 1.0 |
| A | 170 | CA | B | 10  | CA | 29.25 | 1.0 |
| A | 170 | CA | B | 51  | CA | 30.92 | 1.0 |
| A | 170 | CA | B | 187 | CA | 27.26 | 1.0 |

1VFB

|   |   |    |   |     |    |       |     |
|---|---|----|---|-----|----|-------|-----|
| A | 5 | CA | B | 66  | CA | 26.16 | 1.0 |
| A | 5 | CA | B | 12  | CA | 47.89 | 1.0 |
| A | 5 | CA | B | 271 | CA | 31.34 | 1.0 |

Restraint Sets

|   |     |    |   |     |    |       |     |
|---|-----|----|---|-----|----|-------|-----|
| A | 14  | CA | B | 66  | CA | 19.29 | 1.0 |
| A | 14  | CA | B | 12  | CA | 41.94 | 1.0 |
| A | 14  | CA | B | 271 | CA | 38.4  | 1.0 |
| A | 67  | CA | B | 12  | CA | 66.69 | 1.0 |
| A | 67  | CA | B | 66  | CA | 48.01 | 1.0 |
| A | 67  | CA | B | 271 | CA | 48.61 | 1.0 |
| A | 117 | CA | B | 12  | CA | 40.58 | 1.0 |
| A | 117 | CA | B | 66  | CA | 26.95 | 1.0 |
| A | 117 | CA | B | 271 | CA | 13.82 | 1.0 |

1WDW

|   |     |    |   |     |    |       |     |
|---|-----|----|---|-----|----|-------|-----|
| A | 95  | CA | B | 63  | CA | 48.57 | 1.0 |
| A | 95  | CA | B | 175 | CA | 36.44 | 1.0 |
| A | 95  | CA | B | 413 | CA | 86.82 | 1.0 |
| A | 146 | CA | B | 63  | CA | 64.6  | 1.0 |
| A | 146 | CA | B | 175 | CA | 19.85 | 1.0 |
| A | 146 | CA | B | 413 | CA | 91.49 | 1.0 |
| A | 229 | CA | B | 63  | CA | 62.47 | 1.0 |
| A | 229 | CA | B | 175 | CA | 31.65 | 1.0 |
| A | 229 | CA | B | 413 | CA | 85.13 | 1.0 |
| A | 99  | CA | B | 63  | CA | 54.47 | 1.0 |
| A | 99  | CA | B | 175 | CA | 39.41 | 1.0 |
| A | 99  | CA | B | 413 | CA | 93.1  | 1.0 |

1WEJ

|   |    |    |   |     |    |       |     |
|---|----|----|---|-----|----|-------|-----|
| A | 12 | CA | B | 123 | CA | 83.67 | 1.0 |
| A | 12 | CA | B | 187 | CA | 84.43 | 1.0 |
| A | 12 | CA | B | 63  | CA | 37.95 | 1.0 |
| A | 53 | CA | B | 123 | CA | 75.74 | 1.0 |
| A | 53 | CA | B | 187 | CA | 81.23 | 1.0 |
| A | 53 | CA | B | 63  | CA | 31.72 | 1.0 |
| A | 23 | CA | B | 63  | CA | 21.94 | 1.0 |
| A | 23 | CA | B | 123 | CA | 76.62 | 1.0 |
| A | 23 | CA | B | 187 | CA | 79.51 | 1.0 |
| A | 88 | CA | B | 63  | CA | 38.52 | 1.0 |
| A | 88 | CA | B | 123 | CA | 72.52 | 1.0 |
| A | 88 | CA | B | 187 | CA | 73.59 | 1.0 |

1WQ1

|   |     |    |   |      |    |       |     |
|---|-----|----|---|------|----|-------|-----|
| A | 73  | CA | B | 778  | CA | 36.05 | 1.0 |
| A | 73  | CA | B | 842  | CA | 30.96 | 1.0 |
| A | 73  | CA | B | 1034 | CA | 46.08 | 1.0 |
| A | 88  | CA | B | 778  | CA | 16    | 1.0 |
| A | 88  | CA | B | 842  | CA | 44.44 | 1.0 |
| A | 88  | CA | B | 1034 | CA | 29.93 | 1.0 |
| A | 150 | CA | B | 778  | CA | 29.94 | 1.0 |
| A | 150 | CA | B | 842  | CA | 40.48 | 1.0 |
| A | 150 | CA | B | 1034 | CA | 52.27 | 1.0 |
| A | 38  | CA | B | 778  | CA | 27.74 | 1.0 |
| A | 38  | CA | B | 842  | CA | 20.69 | 1.0 |
| A | 38  | CA | B | 1034 | CA | 50.8  | 1.0 |

1XD3



Restraint Sets

|   |    |    |   |     |    |       |     |
|---|----|----|---|-----|----|-------|-----|
| A | 23 | CA | B | 39  | CA | 26.45 | 1.0 |
| A | 23 | CA | B | 76  | CA | 50.82 | 1.0 |
| A | 23 | CA | B | 142 | CA | 40.38 | 1.0 |
| A | 34 | CA | B | 39  | CA | 26    | 1.0 |
| A | 34 | CA | B | 76  | CA | 40.84 | 1.0 |
| A | 34 | CA | B | 142 | CA | 39.85 | 1.0 |
| A | 63 | CA | B | 39  | CA | 23.93 | 1.0 |
| A | 63 | CA | B | 76  | CA | 53.23 | 1.0 |
| A | 63 | CA | B | 142 | CA | 52.48 | 1.0 |
| A | 47 | CA | B | 39  | CA | 13.96 | 1.0 |
| A | 47 | CA | B | 76  | CA | 43.57 | 1.0 |
| A | 47 | CA | B | 142 | CA | 38.14 | 1.0 |

1XQS

|   |     |    |   |     |    |       |     |
|---|-----|----|---|-----|----|-------|-----|
| A | 230 | CA | B | 88  | CA | 22.76 | 1.0 |
| A | 230 | CA | B | 110 | CA | 49.88 | 1.0 |
| A | 230 | CA | B | 348 | CA | 43.86 | 1.0 |
| A | 249 | CA | B | 88  | CA | 35.14 | 1.0 |
| A | 249 | CA | B | 110 | CA | 43.13 | 1.0 |
| A | 249 | CA | B | 348 | CA | 30.9  | 1.0 |
| A | 355 | CA | B | 88  | CA | 46.22 | 1.0 |
| A | 355 | CA | B | 110 | CA | 72.42 | 1.0 |
| A | 355 | CA | B | 348 | CA | 46.84 | 1.0 |
| A | 285 | CA | B | 88  | CA | 25.3  | 1.0 |
| A | 285 | CA | B | 110 | CA | 31.86 | 1.0 |
| A | 285 | CA | B | 348 | CA | 34.81 | 1.0 |

1XU1

|   |     |    |   |     |    |       |     |
|---|-----|----|---|-----|----|-------|-----|
| A | 101 | CA | B | 116 | CA | 37.02 | 1.0 |
| A | 101 | CA | B | 416 | CA | 46.53 | 1.0 |
| A | 101 | CA | B | 747 | CA | 35.32 | 1.0 |
| A | 85  | CA | B | 116 | CA | 19.51 | 1.0 |
| A | 85  | CA | B | 416 | CA | 42.12 | 1.0 |
| A | 85  | CA | B | 747 | CA | 29.87 | 1.0 |
| A | 73  | CA | B | 116 | CA | 32.66 | 1.0 |
| A | 73  | CA | B | 416 | CA | 52.13 | 1.0 |
| A | 73  | CA | B | 747 | CA | 36.68 | 1.0 |
| A | 91  | CA | B | 116 | CA | 28.56 | 1.0 |
| A | 91  | CA | B | 416 | CA | 41.17 | 1.0 |
| A | 91  | CA | B | 747 | CA | 39.32 | 1.0 |

1Y64

|   |     |    |   |      |    |       |     |
|---|-----|----|---|------|----|-------|-----|
| A | 143 | CA | B | 1388 | CA | 57.85 | 1.0 |
| A | 143 | CA | B | 1664 | CA | 39.09 | 1.0 |
| A | 143 | CA | B | 1759 | CA | 67.13 | 1.0 |
| A | 194 | CA | B | 1388 | CA | 71.75 | 1.0 |
| A | 194 | CA | B | 1664 | CA | 68.56 | 1.0 |
| A | 194 | CA | B | 1759 | CA | 40.37 | 1.0 |
| A | 364 | CA | B | 1388 | CA | 28.84 | 1.0 |
| A | 364 | CA | B | 1664 | CA | 66.16 | 1.0 |
| A | 364 | CA | B | 1759 | CA | 86.77 | 1.0 |
| A | 287 | CA | B | 1388 | CA | 69.82 | 1.0 |
| A | 287 | CA | B | 1664 | CA | 43.94 | 1.0 |

Restraint Sets

A 287 CA B 1759 CA 58.12 1.0

1YVB

A 19 CA B 56 CA 36.83 1.0  
 A 19 CA B 124 CA 44.09 1.0  
 A 19 CA B 138 CA 11.38 1.0  
 A 35 CA B 56 CA 38.51 1.0  
 A 35 CA B 124 CA 57.28 1.0  
 A 35 CA B 138 CA 29.89 1.0  
 A 48 CA B 56 CA 33.54 1.0  
 A 48 CA B 124 CA 50.93 1.0  
 A 48 CA B 138 CA 23.91 1.0  
 A 77 CA B 56 CA 50.48 1.0  
 A 77 CA B 124 CA 62.13 1.0  
 A 77 CA B 138 CA 29.65 1.0

1Z0K

A 458 CA B 30 CA 27.01 1.0  
 A 458 CA B 93 CA 27.18 1.0  
 A 458 CA B 170 CA 34.82 1.0  
 A 475 CA B 30 CA 18.87 1.0  
 A 475 CA B 93 CA 42.29 1.0  
 A 475 CA B 170 CA 32.97 1.0  
 A 501 CA B 30 CA 41.74 1.0  
 A 501 CA B 93 CA 39.95 1.0  
 A 501 CA B 170 CA 42.12 1.0  
 A 480 CA B 30 CA 19.51 1.0  
 A 480 CA B 93 CA 39.6 1.0  
 A 480 CA B 170 CA 22.23 1.0

1Z5Y

A 16 CA B 62 CA 33.58 1.0  
 A 16 CA B 81 CA 21.81 1.0  
 A 16 CA B 181 CA 39.17 1.0  
 A 54 CA B 62 CA 48.37 1.0  
 A 54 CA B 81 CA 36.52 1.0  
 A 54 CA B 181 CA 63.3 1.0  
 A 64 CA B 62 CA 45.45 1.0  
 A 64 CA B 81 CA 18.55 1.0  
 A 64 CA B 181 CA 50.57 1.0  
 A 70 CA B 62 CA 35.71 1.0  
 A 70 CA B 81 CA 7.68 1.0  
 A 70 CA B 181 CA 40.02 1.0

1ZHH

A 78 CA B 39 CA 42.58 1.0  
 A 78 CA B 125 CA 49.25 1.0  
 A 78 CA B 279 CA 36.62 1.0  
 A 90 CA B 39 CA 51.88 1.0  
 A 90 CA B 125 CA 63.9 1.0  
 A 90 CA B 279 CA 29.98 1.0  
 A 227 CA B 39 CA 51.15 1.0  
 A 227 CA B 125 CA 65.56 1.0

Restraint Sets

|   |     |    |   |     |    |       |     |
|---|-----|----|---|-----|----|-------|-----|
| A | 227 | CA | B | 279 | CA | 74.24 | 1.0 |
| A | 260 | CA | B | 39  | CA | 18.9  | 1.0 |
| A | 260 | CA | B | 125 | CA | 35.52 | 1.0 |
| A | 260 | CA | B | 279 | CA | 47.56 | 1.0 |

1ZHI

|   |     |    |   |     |    |       |     |
|---|-----|----|---|-----|----|-------|-----|
| A | 517 | CA | B | 105 | CA | 30.12 | 1.0 |
| A | 517 | CA | B | 116 | CA | 19.82 | 1.0 |
| A | 517 | CA | B | 15  | CA | 41.87 | 1.0 |
| A | 523 | CA | B | 105 | CA | 26.62 | 1.0 |
| A | 523 | CA | B | 116 | CA | 14.01 | 1.0 |
| A | 523 | CA | B | 15  | CA | 47.36 | 1.0 |
| A | 569 | CA | B | 15  | CA | 67.28 | 1.0 |
| A | 569 | CA | B | 105 | CA | 56.04 | 1.0 |
| A | 569 | CA | B | 116 | CA | 47.03 | 1.0 |
| A | 492 | CA | B | 15  | CA | 42.39 | 1.0 |
| A | 492 | CA | B | 105 | CA | 17.54 | 1.0 |
| A | 492 | CA | B | 116 | CA | 10.64 | 1.0 |

1ZLI

|   |    |    |   |     |    |       |     |
|---|----|----|---|-----|----|-------|-----|
| A | 2  | CA | B | 94  | CA | 41.98 | 1.0 |
| A | 2  | CA | B | 121 | CA | 10.46 | 1.0 |
| A | 2  | CA | B | 216 | CA | 47.12 | 1.0 |
| A | 5  | CA | B | 94  | CA | 37.51 | 1.0 |
| A | 5  | CA | B | 121 | CA | 11.99 | 1.0 |
| A | 5  | CA | B | 216 | CA | 43.33 | 1.0 |
| A | 51 | CA | B | 94  | CA | 51.46 | 1.0 |
| A | 51 | CA | B | 121 | CA | 34.65 | 1.0 |
| A | 51 | CA | B | 216 | CA | 28.8  | 1.0 |
| A | 28 | CA | B | 94  | CA | 48.38 | 1.0 |
| A | 28 | CA | B | 121 | CA | 5.93  | 1.0 |
| A | 28 | CA | B | 216 | CA | 47.44 | 1.0 |

1ZM4

|   |     |    |   |     |    |        |     |
|---|-----|----|---|-----|----|--------|-----|
| A | 445 | CA | B | 14  | CA | 65.86  | 1.0 |
| A | 445 | CA | B | 295 | CA | 84.1   | 1.0 |
| A | 445 | CA | B | 719 | CA | 35.2   | 1.0 |
| A | 521 | CA | B | 14  | CA | 93.15  | 1.0 |
| A | 521 | CA | B | 295 | CA | 118.62 | 1.0 |
| A | 521 | CA | B | 719 | CA | 45.06  | 1.0 |
| A | 431 | CA | B | 14  | CA | 91.61  | 1.0 |
| A | 431 | CA | B | 295 | CA | 98.01  | 1.0 |
| A | 431 | CA | B | 719 | CA | 51.11  | 1.0 |
| A | 576 | CA | B | 14  | CA | 63.32  | 1.0 |
| A | 576 | CA | B | 295 | CA | 84.17  | 1.0 |
| A | 576 | CA | B | 719 | CA | 17.2   | 1.0 |

2A5T

|   |    |    |   |     |    |       |     |
|---|----|----|---|-----|----|-------|-----|
| A | 62 | CA | B | 66  | CA | 33.97 | 1.0 |
| A | 62 | CA | B | 77  | CA | 36.8  | 1.0 |
| A | 62 | CA | B | 162 | CA | 31.58 | 1.0 |
| A | 74 | CA | B | 66  | CA | 36.68 | 1.0 |
| A | 74 | CA | B | 77  | CA | 36.11 | 1.0 |

Restraint Sets

|   |     |    |   |     |    |       |     |
|---|-----|----|---|-----|----|-------|-----|
| A | 74  | CA | B | 162 | CA | 37.04 | 1.0 |
| A | 181 | CA | B | 66  | CA | 22.65 | 1.0 |
| A | 181 | CA | B | 77  | CA | 18.93 | 1.0 |
| A | 181 | CA | B | 162 | CA | 48.48 | 1.0 |
| A | 283 | CA | B | 66  | CA | 37.17 | 1.0 |
| A | 283 | CA | B | 77  | CA | 45.22 | 1.0 |
| A | 283 | CA | B | 162 | CA | 26.98 | 1.0 |

2A9K

|   |     |    |   |     |    |       |     |
|---|-----|----|---|-----|----|-------|-----|
| A | 52  | CA | B | 36  | CA | 58.82 | 1.0 |
| A | 52  | CA | B | 76  | CA | 39.84 | 1.0 |
| A | 52  | CA | B | 139 | CA | 54.75 | 1.0 |
| A | 70  | CA | B | 36  | CA | 48.54 | 1.0 |
| A | 70  | CA | B | 76  | CA | 19.51 | 1.0 |
| A | 70  | CA | B | 139 | CA | 47.57 | 1.0 |
| A | 197 | CA | B | 36  | CA | 41.99 | 1.0 |
| A | 197 | CA | B | 76  | CA | 28.96 | 1.0 |
| A | 197 | CA | B | 139 | CA | 48.9  | 1.0 |
| A | 141 | CA | B | 36  | CA | 45.1  | 1.0 |
| A | 141 | CA | B | 76  | CA | 37.86 | 1.0 |
| A | 141 | CA | B | 139 | CA | 28.42 | 1.0 |

2ABZ

|   |    |    |   |     |    |       |     |
|---|----|----|---|-----|----|-------|-----|
| A | 41 | CA | B | 28  | CA | 43.84 | 1.0 |
| A | 41 | CA | B | 121 | CA | 35.02 | 1.0 |
| A | 41 | CA | B | 216 | CA | 18.58 | 1.0 |
| A | 35 | CA | B | 28  | CA | 51.69 | 1.0 |
| A | 35 | CA | B | 121 | CA | 36.33 | 1.0 |
| A | 35 | CA | B | 216 | CA | 23.86 | 1.0 |
| A | 24 | CA | B | 28  | CA | 64.53 | 1.0 |
| A | 24 | CA | B | 121 | CA | 47.52 | 1.0 |
| A | 24 | CA | B | 216 | CA | 35.17 | 1.0 |
| A | 15 | CA | B | 28  | CA | 42.33 | 1.0 |
| A | 15 | CA | B | 121 | CA | 20.89 | 1.0 |
| A | 15 | CA | B | 216 | CA | 30.42 | 1.0 |

2AJF

|   |     |    |   |     |    |       |     |
|---|-----|----|---|-----|----|-------|-----|
| A | 353 | CA | B | 21  | CA | 54.72 | 1.0 |
| A | 353 | CA | B | 56  | CA | 54.38 | 1.0 |
| A | 353 | CA | B | 598 | CA | 81.31 | 1.0 |
| A | 404 | CA | B | 21  | CA | 21.27 | 1.0 |
| A | 404 | CA | B | 56  | CA | 41.6  | 1.0 |
| A | 404 | CA | B | 598 | CA | 67.72 | 1.0 |
| A | 486 | CA | B | 21  | CA | 37.58 | 1.0 |
| A | 486 | CA | B | 56  | CA | 23.21 | 1.0 |
| A | 486 | CA | B | 598 | CA | 57.23 | 1.0 |
| A | 470 | CA | B | 21  | CA | 18.59 | 1.0 |
| A | 470 | CA | B | 56  | CA | 35.53 | 1.0 |
| A | 470 | CA | B | 598 | CA | 72.31 | 1.0 |

2AYO

|   |    |    |   |     |    |       |     |
|---|----|----|---|-----|----|-------|-----|
| A | 23 | CA | B | 148 | CA | 21.95 | 1.0 |
| A | 23 | CA | B | 162 | CA | 38.29 | 1.0 |

Restraint Sets

|   |    |    |   |     |    |       |     |
|---|----|----|---|-----|----|-------|-----|
| A | 23 | CA | B | 308 | CA | 26.32 | 1.0 |
| A | 34 | CA | B | 148 | CA | 34.13 | 1.0 |
| A | 34 | CA | B | 162 | CA | 44.29 | 1.0 |
| A | 34 | CA | B | 308 | CA | 19.48 | 1.0 |
| A | 73 | CA | B | 148 | CA | 24.85 | 1.0 |
| A | 73 | CA | B | 162 | CA | 26.8  | 1.0 |
| A | 73 | CA | B | 308 | CA | 35.2  | 1.0 |
| A | 47 | CA | B | 148 | CA | 15.49 | 1.0 |
| A | 47 | CA | B | 162 | CA | 27.78 | 1.0 |
| A | 47 | CA | B | 308 | CA | 28.93 | 1.0 |

2B42

|   |     |    |   |     |    |       |     |
|---|-----|----|---|-----|----|-------|-----|
| A | 147 | CA | B | 186 | CA | 33.08 | 1.0 |
| A | 147 | CA | B | 260 | CA | 41.59 | 1.0 |
| A | 147 | CA | B | 96  | CA | 65.91 | 1.0 |
| A | 155 | CA | B | 186 | CA | 31.92 | 1.0 |
| A | 155 | CA | B | 260 | CA | 46.6  | 1.0 |
| A | 155 | CA | B | 96  | CA | 59.79 | 1.0 |
| A | 122 | CA | B | 96  | CA | 41.33 | 1.0 |
| A | 122 | CA | B | 186 | CA | 26.64 | 1.0 |
| A | 122 | CA | B | 260 | CA | 22.72 | 1.0 |
| A | 87  | CA | B | 96  | CA | 52.85 | 1.0 |
| A | 87  | CA | B | 186 | CA | 10.28 | 1.0 |
| A | 87  | CA | B | 260 | CA | 38.76 | 1.0 |

2B4J

|   |     |    |   |     |    |       |     |
|---|-----|----|---|-----|----|-------|-----|
| A | 347 | CA | B | 119 | CA | 55.45 | 1.0 |
| A | 347 | CA | B | 207 | CA | 63.2  | 1.0 |
| A | 347 | CA | B | 419 | CA | 43.33 | 1.0 |
| A | 370 | CA | B | 119 | CA | 44.56 | 1.0 |
| A | 370 | CA | B | 207 | CA | 46.86 | 1.0 |
| A | 370 | CA | B | 419 | CA | 17.71 | 1.0 |
| A | 425 | CA | B | 119 | CA | 61.2  | 1.0 |
| A | 425 | CA | B | 207 | CA | 55.84 | 1.0 |
| A | 425 | CA | B | 419 | CA | 41.89 | 1.0 |
| A | 366 | CA | B | 119 | CA | 32.73 | 1.0 |
| A | 366 | CA | B | 207 | CA | 38.16 | 1.0 |
| A | 366 | CA | B | 419 | CA | 16.1  | 1.0 |

2BTF

|   |     |    |   |     |    |       |     |
|---|-----|----|---|-----|----|-------|-----|
| A | 40  | CA | B | 57  | CA | 62.33 | 1.0 |
| A | 40  | CA | B | 231 | CA | 71.24 | 1.0 |
| A | 40  | CA | B | 364 | CA | 32.1  | 1.0 |
| A | 60  | CA | B | 57  | CA | 49.01 | 1.0 |
| A | 60  | CA | B | 231 | CA | 47.03 | 1.0 |
| A | 60  | CA | B | 364 | CA | 36.81 | 1.0 |
| A | 136 | CA | B | 57  | CA | 53.54 | 1.0 |
| A | 136 | CA | B | 231 | CA | 74.05 | 1.0 |
| A | 136 | CA | B | 364 | CA | 16.95 | 1.0 |
| A | 117 | CA | B | 57  | CA | 44.21 | 1.0 |
| A | 117 | CA | B | 231 | CA | 57.87 | 1.0 |
| A | 117 | CA | B | 364 | CA | 24.93 | 1.0 |

## Restraint Sets

### 2COL

|   |     |    |   |     |    |       |     |
|---|-----|----|---|-----|----|-------|-----|
| A | 28  | CA | B | 364 | CA | 50.2  | 1.0 |
| A | 28  | CA | B | 455 | CA | 58.04 | 1.0 |
| A | 28  | CA | B | 572 | CA | 15.5  | 1.0 |
| A | 50  | CA | B | 364 | CA | 48.44 | 1.0 |
| A | 50  | CA | B | 455 | CA | 37.15 | 1.0 |
| A | 50  | CA | B | 572 | CA | 29.46 | 1.0 |
| A | 87  | CA | B | 364 | CA | 58.52 | 1.0 |
| A | 87  | CA | B | 455 | CA | 57.93 | 1.0 |
| A | 87  | CA | B | 572 | CA | 34.95 | 1.0 |
| A | 103 | CA | B | 364 | CA | 52.73 | 1.0 |
| A | 103 | CA | B | 455 | CA | 51.43 | 1.0 |
| A | 103 | CA | B | 572 | CA | 15.9  | 1.0 |

### 2CFH

|   |     |    |   |    |    |       |     |
|---|-----|----|---|----|----|-------|-----|
| A | 4   | CA | B | 17 | CA | 10.5  | 1.0 |
| A | 4   | CA | B | 34 | CA | 28    | 1.0 |
| A | 4   | CA | B | 71 | CA | 28.03 | 1.0 |
| A | 26  | CA | B | 17 | CA | 33.54 | 1.0 |
| A | 26  | CA | B | 34 | CA | 21.6  | 1.0 |
| A | 26  | CA | B | 71 | CA | 48.49 | 1.0 |
| A | 147 | CA | B | 17 | CA | 25.89 | 1.0 |
| A | 147 | CA | B | 34 | CA | 34.61 | 1.0 |
| A | 147 | CA | B | 71 | CA | 42.06 | 1.0 |
| A | 52  | CA | B | 17 | CA | 13.11 | 1.0 |
| A | 52  | CA | B | 34 | CA | 33.01 | 1.0 |
| A | 52  | CA | B | 71 | CA | 44.87 | 1.0 |

### 2FD6

|   |     |    |   |     |    |        |     |
|---|-----|----|---|-----|----|--------|-----|
| A | 13  | CA | B | 121 | CA | 111.48 | 1.0 |
| A | 13  | CA | B | 183 | CA | 113.31 | 1.0 |
| A | 13  | CA | B | 53  | CA | 59.91  | 1.0 |
| A | 212 | CA | B | 121 | CA | 71.45  | 1.0 |
| A | 212 | CA | B | 183 | CA | 69.72  | 1.0 |
| A | 212 | CA | B | 53  | CA | 33     | 1.0 |
| A | 179 | CA | B | 53  | CA | 15.47  | 1.0 |
| A | 179 | CA | B | 121 | CA | 72.33  | 1.0 |
| A | 179 | CA | B | 183 | CA | 76.18  | 1.0 |
| A | 267 | CA | B | 53  | CA | 32.33  | 1.0 |
| A | 267 | CA | B | 121 | CA | 65.76  | 1.0 |
| A | 267 | CA | B | 183 | CA | 65.77  | 1.0 |

### 2FJU

|   |     |    |   |     |    |       |     |
|---|-----|----|---|-----|----|-------|-----|
| A | 25  | CA | B | 79  | CA | 41.39 | 1.0 |
| A | 25  | CA | B | 187 | CA | 39.4  | 1.0 |
| A | 25  | CA | B | 563 | CA | 84.42 | 1.0 |
| A | 104 | CA | B | 79  | CA | 17.43 | 1.0 |
| A | 104 | CA | B | 187 | CA | 52.89 | 1.0 |
| A | 104 | CA | B | 563 | CA | 76.62 | 1.0 |
| A | 131 | CA | B | 79  | CA | 47.34 | 1.0 |
| A | 131 | CA | B | 187 | CA | 73.63 | 1.0 |
| A | 131 | CA | B | 563 | CA | 95    | 1.0 |
| A | 47  | CA | B | 79  | CA | 45.57 | 1.0 |

Restraint Sets

|   |    |    |   |     |    |       |     |
|---|----|----|---|-----|----|-------|-----|
| A | 47 | CA | B | 187 | CA | 43.01 | 1.0 |
| A | 47 | CA | B | 563 | CA | 96.56 | 1.0 |

2G77

|   |     |    |   |     |    |       |     |
|---|-----|----|---|-----|----|-------|-----|
| A | 96  | CA | B | 250 | CA | 49.34 | 1.0 |
| A | 96  | CA | B | 415 | CA | 38.86 | 1.0 |
| A | 96  | CA | B | 471 | CA | 27.92 | 1.0 |
| A | 160 | CA | B | 250 | CA | 66.27 | 1.0 |
| A | 160 | CA | B | 415 | CA | 46.94 | 1.0 |
| A | 160 | CA | B | 471 | CA | 46.2  | 1.0 |
| A | 79  | CA | B | 250 | CA | 62.54 | 1.0 |
| A | 79  | CA | B | 415 | CA | 64.17 | 1.0 |
| A | 79  | CA | B | 471 | CA | 29.21 | 1.0 |
| A | 61  | CA | B | 250 | CA | 38.42 | 1.0 |
| A | 61  | CA | B | 415 | CA | 28.36 | 1.0 |
| A | 61  | CA | B | 471 | CA | 35.81 | 1.0 |

2H7V

|   |     |    |   |     |    |        |     |
|---|-----|----|---|-----|----|--------|-----|
| A | 63  | CA | B | 442 | CA | 37.77  | 1.0 |
| A | 63  | CA | B | 588 | CA | 17.47  | 1.0 |
| A | 63  | CA | B | 659 | CA | 77.05  | 1.0 |
| A | 130 | CA | B | 442 | CA | 67.15  | 1.0 |
| A | 130 | CA | B | 588 | CA | 42.12  | 1.0 |
| A | 130 | CA | B | 659 | CA | 81.11  | 1.0 |
| A | 48  | CA | B | 442 | CA | 67.64  | 1.0 |
| A | 48  | CA | B | 588 | CA | 27.12  | 1.0 |
| A | 48  | CA | B | 659 | CA | 104.38 | 1.0 |
| A | 30  | CA | B | 442 | CA | 49.24  | 1.0 |
| A | 30  | CA | B | 588 | CA | 25.68  | 1.0 |
| A | 30  | CA | B | 659 | CA | 71.69  | 1.0 |

2HLE

|   |     |    |   |     |    |       |     |
|---|-----|----|---|-----|----|-------|-----|
| A | 89  | CA | B | 18  | CA | 43.79 | 1.0 |
| A | 89  | CA | B | 117 | CA | 50.2  | 1.0 |
| A | 89  | CA | B | 155 | CA | 23.59 | 1.0 |
| A | 166 | CA | B | 18  | CA | 45.44 | 1.0 |
| A | 166 | CA | B | 117 | CA | 46.21 | 1.0 |
| A | 166 | CA | B | 155 | CA | 24.19 | 1.0 |
| A | 71  | CA | B | 18  | CA | 35.58 | 1.0 |
| A | 71  | CA | B | 117 | CA | 41.67 | 1.0 |
| A | 71  | CA | B | 155 | CA | 45.25 | 1.0 |
| A | 123 | CA | B | 18  | CA | 28.24 | 1.0 |
| A | 123 | CA | B | 117 | CA | 30.19 | 1.0 |
| A | 123 | CA | B | 155 | CA | 9.53  | 1.0 |

2HMI

|   |     |    |   |     |    |        |     |
|---|-----|----|---|-----|----|--------|-----|
| A | 123 | CA | B | 79  | CA | 128.09 | 1.0 |
| A | 123 | CA | B | 196 | CA | 96.13  | 1.0 |
| A | 123 | CA | B | 899 | CA | 105.6  | 1.0 |
| A | 187 | CA | B | 79  | CA | 128.82 | 1.0 |
| A | 187 | CA | B | 196 | CA | 92.96  | 1.0 |
| A | 187 | CA | B | 899 | CA | 109.18 | 1.0 |
| A | 357 | CA | B | 79  | CA | 70.07  | 1.0 |

## Restraint Sets

|   |     |    |   |     |    |       |     |
|---|-----|----|---|-----|----|-------|-----|
| A | 357 | CA | B | 196 | CA | 54.31 | 1.0 |
| A | 357 | CA | B | 899 | CA | 67.64 | 1.0 |
| A | 60  | CA | B | 79  | CA | 90.07 | 1.0 |
| A | 60  | CA | B | 196 | CA | 81.05 | 1.0 |
| A | 60  | CA | B | 899 | CA | 47.46 | 1.0 |

### 2HQS

|   |     |    |   |     |    |       |     |
|---|-----|----|---|-----|----|-------|-----|
| A | 85  | CA | B | 65  | CA | 56.35 | 1.0 |
| A | 85  | CA | B | 89  | CA | 81.43 | 1.0 |
| A | 85  | CA | B | 282 | CA | 39.82 | 1.0 |
| A | 97  | CA | B | 65  | CA | 64.13 | 1.0 |
| A | 97  | CA | B | 89  | CA | 89.25 | 1.0 |
| A | 97  | CA | B | 282 | CA | 40.72 | 1.0 |
| A | 140 | CA | B | 65  | CA | 54.68 | 1.0 |
| A | 140 | CA | B | 89  | CA | 79.18 | 1.0 |
| A | 140 | CA | B | 282 | CA | 26.6  | 1.0 |
| A | 114 | CA | B | 65  | CA | 26.9  | 1.0 |
| A | 114 | CA | B | 89  | CA | 51.53 | 1.0 |
| A | 114 | CA | B | 282 | CA | 25.31 | 1.0 |

### 2HRK

|   |     |    |   |     |    |       |     |
|---|-----|----|---|-----|----|-------|-----|
| A | 24  | CA | B | 80  | CA | 43.62 | 1.0 |
| A | 24  | CA | B | 162 | CA | 24.23 | 1.0 |
| A | 24  | CA | B | 195 | CA | 44.48 | 1.0 |
| A | 92  | CA | B | 80  | CA | 44.37 | 1.0 |
| A | 92  | CA | B | 162 | CA | 17.99 | 1.0 |
| A | 92  | CA | B | 195 | CA | 61.49 | 1.0 |
| A | 110 | CA | B | 80  | CA | 28.8  | 1.0 |
| A | 110 | CA | B | 162 | CA | 23.3  | 1.0 |
| A | 110 | CA | B | 195 | CA | 49.9  | 1.0 |
| A | 112 | CA | B | 80  | CA | 31.9  | 1.0 |
| A | 112 | CA | B | 162 | CA | 27.65 | 1.0 |
| A | 112 | CA | B | 195 | CA | 54.98 | 1.0 |

### 2I25

|   |     |    |   |     |    |       |     |
|---|-----|----|---|-----|----|-------|-----|
| A | 5   | CA | B | 94  | CA | 28.3  | 1.0 |
| A | 5   | CA | B | 59  | CA | 39.76 | 1.0 |
| A | 5   | CA | B | 111 | CA | 62.88 | 1.0 |
| A | 14  | CA | B | 94  | CA | 32.98 | 1.0 |
| A | 14  | CA | B | 59  | CA | 35.98 | 1.0 |
| A | 14  | CA | B | 111 | CA | 59.61 | 1.0 |
| A | 117 | CA | B | 59  | CA | 29.56 | 1.0 |
| A | 117 | CA | B | 94  | CA | 22.26 | 1.0 |
| A | 117 | CA | B | 111 | CA | 52.49 | 1.0 |
| A | 47  | CA | B | 59  | CA | 28.24 | 1.0 |
| A | 47  | CA | B | 94  | CA | 8.06  | 1.0 |
| A | 47  | CA | B | 111 | CA | 41.74 | 1.0 |

### 2I9B

|   |    |    |   |     |    |       |     |
|---|----|----|---|-----|----|-------|-----|
| A | 94 | CA | B | 13  | CA | 26.8  | 1.0 |
| A | 94 | CA | B | 112 | CA | 39.18 | 1.0 |
| A | 94 | CA | B | 212 | CA | 53.89 | 1.0 |
| A | 20 | CA | B | 13  | CA | 25.71 | 1.0 |



Restraint Sets

|   |     |    |   |     |    |       |     |
|---|-----|----|---|-----|----|-------|-----|
| A | 20  | CA | B | 112 | CA | 21.95 | 1.0 |
| A | 20  | CA | B | 212 | CA | 32.21 | 1.0 |
| A | 132 | CA | B | 13  | CA | 48.43 | 1.0 |
| A | 132 | CA | B | 112 | CA | 44.7  | 1.0 |
| A | 132 | CA | B | 212 | CA | 67.12 | 1.0 |
| A | 77  | CA | B | 13  | CA | 18.45 | 1.0 |
| A | 77  | CA | B | 112 | CA | 40.82 | 1.0 |
| A | 77  | CA | B | 212 | CA | 60.4  | 1.0 |

2IDO

|   |    |    |   |     |    |       |     |
|---|----|----|---|-----|----|-------|-----|
| A | 11 | CA | B | 60  | CA | 30.19 | 1.0 |
| A | 11 | CA | B | 113 | CA | 33.24 | 1.0 |
| A | 11 | CA | B | 151 | CA | 31.93 | 1.0 |
| A | 44 | CA | B | 60  | CA | 23.07 | 1.0 |
| A | 44 | CA | B | 113 | CA | 39.3  | 1.0 |
| A | 44 | CA | B | 151 | CA | 29.31 | 1.0 |
| A | 76 | CA | B | 60  | CA | 11.2  | 1.0 |
| A | 76 | CA | B | 113 | CA | 27.72 | 1.0 |
| A | 76 | CA | B | 151 | CA | 40.12 | 1.0 |
| A | 51 | CA | B | 60  | CA | 28.28 | 1.0 |
| A | 51 | CA | B | 113 | CA | 40.45 | 1.0 |
| A | 51 | CA | B | 151 | CA | 40.34 | 1.0 |

2JOT

|   |     |    |   |     |    |       |     |
|---|-----|----|---|-----|----|-------|-----|
| A | 14  | CA | B | 127 | CA | 33.45 | 1.0 |
| A | 14  | CA | B | 260 | CA | 40.71 | 1.0 |
| A | 14  | CA | B | 181 | CA | 15.93 | 1.0 |
| A | 110 | CA | B | 127 | CA | 47.77 | 1.0 |
| A | 110 | CA | B | 260 | CA | 46.98 | 1.0 |
| A | 110 | CA | B | 181 | CA | 29.81 | 1.0 |
| A | 67  | CA | B | 127 | CA | 29.75 | 1.0 |
| A | 67  | CA | B | 181 | CA | 14.3  | 1.0 |
| A | 67  | CA | B | 260 | CA | 20.2  | 1.0 |
| A | 31  | CA | B | 127 | CA | 37.87 | 1.0 |
| A | 31  | CA | B | 181 | CA | 25.27 | 1.0 |
| A | 31  | CA | B | 260 | CA | 25.76 | 1.0 |

2J7P

|   |     |    |   |     |    |       |     |
|---|-----|----|---|-----|----|-------|-----|
| A | 41  | CA | B | 7   | CA | 22.49 | 1.0 |
| A | 41  | CA | B | 24  | CA | 28.27 | 1.0 |
| A | 41  | CA | B | 178 | CA | 50.99 | 1.0 |
| A | 59  | CA | B | 7   | CA | 30.14 | 1.0 |
| A | 59  | CA | B | 24  | CA | 32.49 | 1.0 |
| A | 59  | CA | B | 178 | CA | 73.94 | 1.0 |
| A | 164 | CA | B | 7   | CA | 46.13 | 1.0 |
| A | 164 | CA | B | 24  | CA | 65.76 | 1.0 |
| A | 164 | CA | B | 178 | CA | 34.02 | 1.0 |
| A | 129 | CA | B | 7   | CA | 49.74 | 1.0 |
| A | 129 | CA | B | 24  | CA | 64.51 | 1.0 |
| A | 129 | CA | B | 178 | CA | 54.12 | 1.0 |

2JEL

|   |    |    |   |     |    |       |     |
|---|----|----|---|-----|----|-------|-----|
| A | 17 | CA | B | 123 | CA | 85.89 | 1.0 |
|---|----|----|---|-----|----|-------|-----|

Restraint Sets

|   |    |    |   |     |    |       |       |
|---|----|----|---|-----|----|-------|-------|
| A | 17 | CA | B | 184 | CA | 90.43 | 1.0   |
| A | 17 | CA | B | 66  | CA | 42.58 | 1.0   |
| A | 48 | CA | B | 123 | CA | 83.51 | 1.0   |
| A | 48 | CA | B | 184 | CA | 87.76 | 1.0   |
| A | 48 | CA | B | 66  | CA | 32.95 | 1.0   |
| A | 58 | CA | B | 66  | CA | 37.19 | 1.0   |
| A | 58 | CA | B | 123 | CA | 75.27 | 1.0 5 |
| A | 58 | CA | B | 184 | CA | 77.24 | 1.0   |
| A | 68 | CA | B | 66  | CA | 27.4  | 1.0   |
| A | 68 | CA | B | 123 | CA | 62.8  | 1.0   |
| A | 68 | CA | B | 184 | CA | 70.1  | 1.0   |

2MTA

|   |     |    |   |     |    |       |     |
|---|-----|----|---|-----|----|-------|-----|
| A | 12  | CA | B | 457 | CA | 52.13 | 1.0 |
| A | 12  | CA | B | 357 | CA | 52.18 | 1.0 |
| A | 12  | CA | B | 63  | CA | 26.44 | 1.0 |
| A | 26  | CA | B | 457 | CA | 40.07 | 1.0 |
| A | 26  | CA | B | 357 | CA | 45.28 | 1.0 |
| A | 26  | CA | B | 63  | CA | 25.46 | 1.0 |
| A | 64  | CA | B | 63  | CA | 44.72 | 1.0 |
| A | 64  | CA | B | 357 | CA | 30.91 | 1.0 |
| A | 64  | CA | B | 457 | CA | 59.39 | 1.0 |
| A | 105 | CA | B | 63  | CA | 49.78 | 1.0 |
| A | 105 | CA | B | 357 | CA | 45.21 | 1.0 |
| A | 105 | CA | B | 457 | CA | 62.23 | 1.0 |

2NZ8

|   |     |    |   |      |    |       |     |
|---|-----|----|---|------|----|-------|-----|
| A | 24  | CA | B | 1232 | CA | 24.9  | 1.0 |
| A | 24  | CA | B | 1353 | CA | 24.03 | 1.0 |
| A | 24  | CA | B | 1532 | CA | 53.63 | 1.0 |
| A | 104 | CA | B | 1232 | CA | 42.45 | 1.0 |
| A | 104 | CA | B | 1353 | CA | 31.54 | 1.0 |
| A | 104 | CA | B | 1532 | CA | 41.03 | 1.0 |
| A | 33  | CA | B | 1232 | CA | 12.96 | 1.0 |
| A | 33  | CA | B | 1353 | CA | 32.17 | 1.0 |
| A | 33  | CA | B | 1532 | CA | 45.71 | 1.0 |
| A | 131 | CA | B | 1232 | CA | 33.59 | 1.0 |
| A | 131 | CA | B | 1353 | CA | 56.67 | 1.0 |
| A | 131 | CA | B | 1532 | CA | 42.77 | 1.0 |

2O3B

|   |     |    |   |     |    |       |     |
|---|-----|----|---|-----|----|-------|-----|
| A | 16  | CA | B | 135 | CA | 30.98 | 1.0 |
| A | 16  | CA | B | 152 | CA | 23.66 | 1.0 |
| A | 16  | CA | B | 262 | CA | 58.99 | 1.0 |
| A | 43  | CA | B | 135 | CA | 29.47 | 1.0 |
| A | 43  | CA | B | 152 | CA | 28.83 | 1.0 |
| A | 43  | CA | B | 262 | CA | 58.8  | 1.0 |
| A | 118 | CA | B | 135 | CA | 30.99 | 1.0 |
| A | 118 | CA | B | 152 | CA | 30.96 | 1.0 |
| A | 118 | CA | B | 262 | CA | 64.11 | 1.0 |
| A | 86  | CA | B | 135 | CA | 27.15 | 1.0 |
| A | 86  | CA | B | 152 | CA | 28.06 | 1.0 |
| A | 86  | CA | B | 262 | CA | 57.65 | 1.0 |

## Restraint Sets

### 208V

|   |     |    |   |     |    |       |     |
|---|-----|----|---|-----|----|-------|-----|
| A | 12  | CA | B | 20  | CA | 54.85 | 1.0 |
| A | 12  | CA | B | 116 | CA | 60.4  | 1.0 |
| A | 12  | CA | B | 196 | CA | 27.26 | 1.0 |
| A | 33  | CA | B | 20  | CA | 36.82 | 1.0 |
| A | 33  | CA | B | 116 | CA | 37.54 | 1.0 |
| A | 33  | CA | B | 196 | CA | 20.31 | 1.0 |
| A | 105 | CA | B | 20  | CA | 56.99 | 1.0 |
| A | 105 | CA | B | 116 | CA | 56.11 | 1.0 |
| A | 105 | CA | B | 196 | CA | 43.04 | 1.0 |
| A | 2   | CA | B | 20  | CA | 48.81 | 1.0 |
| A | 2   | CA | B | 116 | CA | 43.33 | 1.0 |
| A | 2   | CA | B | 196 | CA | 23.06 | 1.0 |

### 200B

|   |    |    |   |     |    |       |     |
|---|----|----|---|-----|----|-------|-----|
| A | 23 | CA | B | 932 | CA | 20.49 | 1.0 |
| A | 23 | CA | B | 941 | CA | 20.03 | 1.0 |
| A | 23 | CA | B | 955 | CA | 28.8  | 1.0 |
| A | 34 | CA | B | 932 | CA | 24.63 | 1.0 |
| A | 34 | CA | B | 941 | CA | 18.08 | 1.0 |
| A | 34 | CA | B | 955 | CA | 34.72 | 1.0 |
| A | 47 | CA | B | 932 | CA | 7.03  | 1.0 |
| A | 47 | CA | B | 941 | CA | 15.35 | 1.0 |
| A | 47 | CA | B | 955 | CA | 14.3  | 1.0 |
| A | 64 | CA | B | 932 | CA | 17.54 | 1.0 |
| A | 64 | CA | B | 941 | CA | 23.93 | 1.0 |
| A | 64 | CA | B | 955 | CA | 30.1  | 1.0 |

### 200R

|   |     |    |   |     |    |       |     |
|---|-----|----|---|-----|----|-------|-----|
| A | 101 | CA | B | 282 | CA | 35.01 | 1.0 |
| A | 101 | CA | B | 361 | CA | 43.87 | 1.0 |
| A | 101 | CA | B | 514 | CA | 54.19 | 1.0 |
| A | 113 | CA | B | 282 | CA | 34.62 | 1.0 |
| A | 113 | CA | B | 361 | CA | 64.27 | 1.0 |
| A | 113 | CA | B | 514 | CA | 42.53 | 1.0 |
| A | 167 | CA | B | 282 | CA | 58.36 | 1.0 |
| A | 167 | CA | B | 361 | CA | 71.57 | 1.0 |
| A | 167 | CA | B | 514 | CA | 55.13 | 1.0 |
| A | 47  | CA | B | 282 | CA | 47.36 | 1.0 |
| A | 47  | CA | B | 361 | CA | 62.78 | 1.0 |
| A | 47  | CA | B | 514 | CA | 64.69 | 1.0 |

### 20T3

|   |     |    |   |     |    |       |     |
|---|-----|----|---|-----|----|-------|-----|
| A | 85  | CA | B | 147 | CA | 45.26 | 1.0 |
| A | 85  | CA | B | 166 | CA | 36.88 | 1.0 |
| A | 85  | CA | B | 262 | CA | 34.26 | 1.0 |
| A | 104 | CA | B | 147 | CA | 62.98 | 1.0 |
| A | 104 | CA | B | 166 | CA | 57.21 | 1.0 |
| A | 104 | CA | B | 262 | CA | 42.28 | 1.0 |
| A | 65  | CA | B | 147 | CA | 35.78 | 1.0 |
| A | 65  | CA | B | 166 | CA | 42.07 | 1.0 |
| A | 65  | CA | B | 262 | CA | 49.61 | 1.0 |

Restraint Sets

|   |    |    |   |     |    |       |     |
|---|----|----|---|-----|----|-------|-----|
| A | 50 | CA | B | 147 | CA | 43.92 | 1.0 |
| A | 50 | CA | B | 166 | CA | 49.93 | 1.0 |
| A | 50 | CA | B | 262 | CA | 20.35 | 1.0 |

2OUL

|   |     |    |   |     |    |       |     |
|---|-----|----|---|-----|----|-------|-----|
| A | 102 | CA | B | 42  | CA | 46.39 | 1.0 |
| A | 102 | CA | B | 56  | CA | 30.92 | 1.0 |
| A | 102 | CA | B | 178 | CA | 46.86 | 1.0 |
| A | 82  | CA | B | 42  | CA | 64.33 | 1.0 |
| A | 82  | CA | B | 56  | CA | 48.44 | 1.0 |
| A | 82  | CA | B | 178 | CA | 56.43 | 1.0 |
| A | 93  | CA | B | 42  | CA | 36.38 | 1.0 |
| A | 93  | CA | B | 56  | CA | 31.65 | 1.0 |
| A | 93  | CA | B | 178 | CA | 31.46 | 1.0 |
| A | 63  | CA | B | 42  | CA | 34.82 | 1.0 |
| A | 63  | CA | B | 56  | CA | 20.58 | 1.0 |
| A | 63  | CA | B | 178 | CA | 38.05 | 1.0 |

2OZA

|   |     |    |   |     |    |       |     |
|---|-----|----|---|-----|----|-------|-----|
| A | 179 | CA | B | 124 | CA | 39.97 | 1.0 |
| A | 179 | CA | B | 260 | CA | 49.41 | 1.0 |
| A | 179 | CA | B | 346 | CA | 54.17 | 1.0 |
| A | 293 | CA | B | 124 | CA | 51.86 | 1.0 |
| A | 293 | CA | B | 260 | CA | 32.82 | 1.0 |
| A | 293 | CA | B | 346 | CA | 54.69 | 1.0 |
| A | 86  | CA | B | 124 | CA | 65.08 | 1.0 |
| A | 86  | CA | B | 260 | CA | 74.5  | 1.0 |
| A | 86  | CA | B | 346 | CA | 53.9  | 1.0 |
| A | 216 | CA | B | 124 | CA | 33.23 | 1.0 |
| A | 216 | CA | B | 260 | CA | 46.69 | 1.0 |
| A | 216 | CA | B | 346 | CA | 53.7  | 1.0 |

2PCC

|   |    |    |   |     |    |       |     |
|---|----|----|---|-----|----|-------|-----|
| A | 14 | CA | B | 39  | CA | 10.77 | 1.0 |
| A | 14 | CA | B | 98  | CA | 34.93 | 1.0 |
| A | 14 | CA | B | 240 | CA | 32.23 | 1.0 |
| A | 50 | CA | B | 39  | CA | 29.76 | 1.0 |
| A | 50 | CA | B | 98  | CA | 46.46 | 1.0 |
| A | 50 | CA | B | 240 | CA | 35.46 | 1.0 |
| A | 23 | CA | B | 39  | CA | 27.61 | 1.0 |
| A | 23 | CA | B | 98  | CA | 52.31 | 1.0 |
| A | 23 | CA | B | 240 | CA | 38.19 | 1.0 |
| A | -4 | CA | B | 39  | CA | 26.43 | 1.0 |
| A | -4 | CA | B | 98  | CA | 37.84 | 1.0 |
| A | -4 | CA | B | 240 | CA | 54.45 | 1.0 |

2SIC

|   |     |    |   |     |    |       |     |
|---|-----|----|---|-----|----|-------|-----|
| A | 47  | CA | B | 17  | CA | 57.5  | 1.0 |
| A | 47  | CA | B | 116 | CA | 43.66 | 1.0 |
| A | 47  | CA | B | 260 | CA | 47.16 | 1.0 |
| A | 100 | CA | B | 17  | CA | 37.25 | 1.0 |
| A | 100 | CA | B | 116 | CA | 32.72 | 1.0 |
| A | 100 | CA | B | 260 | CA | 29.54 | 1.0 |

Restraint Sets

|   |    |    |   |     |    |       |     |
|---|----|----|---|-----|----|-------|-----|
| A | 23 | CA | B | 17  | CA | 46.35 | 1.0 |
| A | 23 | CA | B | 116 | CA | 49.38 | 1.0 |
| A | 23 | CA | B | 260 | CA | 35.79 | 1.0 |
| A | 67 | CA | B | 17  | CA | 41.36 | 1.0 |
| A | 67 | CA | B | 116 | CA | 26.77 | 1.0 |
| A | 67 | CA | B | 260 | CA | 27.5  | 1.0 |

2SNI

|   |    |    |   |     |    |       |     |
|---|----|----|---|-----|----|-------|-----|
| A | 32 | CA | B | 17  | CA | 50.5  | 1.0 |
| A | 32 | CA | B | 116 | CA | 40.66 | 1.0 |
| A | 32 | CA | B | 260 | CA | 39.36 | 1.0 |
| A | 42 | CA | B | 17  | CA | 49.03 | 1.0 |
| A | 42 | CA | B | 116 | CA | 47.99 | 1.0 |
| A | 42 | CA | B | 260 | CA | 35.06 | 1.0 |
| A | 60 | CA | B | 17  | CA | 27.67 | 1.0 |
| A | 60 | CA | B | 116 | CA | 28.28 | 1.0 |
| A | 60 | CA | B | 260 | CA | 22.49 | 1.0 |
| A | 54 | CA | B | 17  | CA | 41.37 | 1.0 |
| A | 54 | CA | B | 116 | CA | 26.28 | 1.0 |
| A | 54 | CA | B | 260 | CA | 29.76 | 1.0 |

2UUY

|   |    |    |   |     |    |       |     |
|---|----|----|---|-----|----|-------|-----|
| A | 66 | CA | B | 171 | CA | 37.29 | 1.0 |
| A | 66 | CA | B | 242 | CA | 38.71 | 1.0 |
| A | 66 | CA | B | 26  | CA | 33.35 | 1.0 |
| A | 70 | CA | B | 171 | CA | 39.71 | 1.0 |
| A | 70 | CA | B | 242 | CA | 43.23 | 1.0 |
| A | 70 | CA | B | 26  | CA | 38.48 | 1.0 |
| A | 28 | CA | B | 26  | CA | 34.56 | 1.0 |
| A | 28 | CA | B | 171 | CA | 30.46 | 1.0 |
| A | 28 | CA | B | 242 | CA | 52.32 | 1.0 |
| A | 37 | CA | B | 26  | CA | 24.84 | 1.0 |
| A | 37 | CA | B | 171 | CA | 14    | 1.0 |
| A | 37 | CA | B | 242 | CA | 31.95 | 1.0 |

2VDB

|   |    |    |   |     |    |       |     |
|---|----|----|---|-----|----|-------|-----|
| A | 26 | CA | B | 7   | CA | 49.69 | 1.0 |
| A | 26 | CA | B | 366 | CA | 20.1  | 1.0 |
| A | 26 | CA | B | 564 | CA | 80.89 | 1.0 |
| A | 38 | CA | B | 7   | CA | 32.14 | 1.0 |
| A | 38 | CA | B | 366 | CA | 36.19 | 1.0 |
| A | 38 | CA | B | 564 | CA | 75.99 | 1.0 |
| A | -1 | CA | B | 7   | CA | 43.8  | 1.0 |
| A | -1 | CA | B | 366 | CA | 47.17 | 1.0 |
| A | -1 | CA | B | 564 | CA | 89.16 | 1.0 |
| A | 20 | CA | B | 7   | CA | 47.05 | 1.0 |
| A | 20 | CA | B | 366 | CA | 27.22 | 1.0 |
| A | 20 | CA | B | 564 | CA | 86.21 | 1.0 |

2VIS

|   |     |    |  |      |    |       |     |
|---|-----|----|--|------|----|-------|-----|
| A | 189 | CA |  | 1186 | CA | 70.43 | 1.0 |
| A | 189 | CA |  | 1358 | CA | 22.69 | 1.0 |
| A | 189 | CA |  | 168  | CA | 21.2  | 1.0 |

Restraint Sets

|   |     |    |      |    |        |     |
|---|-----|----|------|----|--------|-----|
| A | 287 | CA | I186 | CA | 111.21 | 1.0 |
| A | 287 | CA | I358 | CA | 65.36  | 1.0 |
| A | 287 | CA | I68  | CA | 66.39  | 1.0 |
| A | 171 | CA | I68  | CA | 57.55  | 1.0 |
| A | 171 | CA | I186 | CA | 87.58  | 1.0 |
| A | 171 | CA | I358 | CA | 39.47  | 1.0 |
| A | 143 | CA | I68  | CA | 28.77  | 1.0 |
| A | 143 | CA | I186 | CA | 68.5   | 1.0 |
| A | 143 | CA | I358 | CA | 29.18  | 1.0 |

2Z0E

|   |    |    |       |    |       |     |
|---|----|----|-------|----|-------|-----|
| A | 10 | CA | B 39  | CA | 59.13 | 1.0 |
| A | 10 | CA | B 133 | CA | 37.95 | 1.0 |
| A | 10 | CA | B 337 | CA | 44.01 | 1.0 |
| A | 26 | CA | B 39  | CA | 68.04 | 1.0 |
| A | 26 | CA | B 133 | CA | 48.49 | 1.0 |
| A | 26 | CA | B 337 | CA | 42.42 | 1.0 |
| A | 76 | CA | B 39  | CA | 41.28 | 1.0 |
| A | 76 | CA | B 133 | CA | 14.58 | 1.0 |
| A | 76 | CA | B 337 | CA | 25.39 | 1.0 |
| A | 93 | CA | B 39  | CA | 46.55 | 1.0 |
| A | 93 | CA | B 133 | CA | 36.63 | 1.0 |
| A | 93 | CA | B 337 | CA | 18.3  | 1.0 |

3BP8

|   |    |    |       |    |       |     |
|---|----|----|-------|----|-------|-----|
| A | 55 | CA | B 56  | CA | 21.38 | 1.0 |
| A | 55 | CA | B 279 | CA | 65.47 | 1.0 |
| A | 55 | CA | B 638 | CA | 82.43 | 1.0 |
| A | 85 | CA | B 56  | CA | 29.43 | 1.0 |
| A | 85 | CA | B 279 | CA | 68.03 | 1.0 |
| A | 85 | CA | B 638 | CA | 95.62 | 1.0 |
| A | 34 | CA | B 56  | CA | 10.53 | 1.0 |
| A | 34 | CA | B 279 | CA | 58.1  | 1.0 |
| A | 34 | CA | B 638 | CA | 76.63 | 1.0 |
| A | 64 | CA | B 56  | CA | 27.73 | 1.0 |
| A | 64 | CA | B 279 | CA | 43.83 | 1.0 |
| A | 64 | CA | B 638 | CA | 80.04 | 1.0 |

3CPH

|   |     |    |       |    |       |     |
|---|-----|----|-------|----|-------|-----|
| A | 42  | CA | B 31  | CA | 25.57 | 1.0 |
| A | 42  | CA | B 67  | CA | 49.4  | 1.0 |
| A | 42  | CA | B 183 | CA | 62.92 | 1.0 |
| A | 105 | CA | B 31  | CA | 37.21 | 1.0 |
| A | 105 | CA | B 67  | CA | 38.6  | 1.0 |
| A | 105 | CA | B 183 | CA | 76.99 | 1.0 |
| A | 87  | CA | B 31  | CA | 25.04 | 1.0 |
| A | 87  | CA | B 67  | CA | 23.63 | 1.0 |
| A | 87  | CA | B 183 | CA | 50.74 | 1.0 |
| A | 185 | CA | B 31  | CA | 45.4  | 1.0 |
| A | 185 | CA | B 67  | CA | 39.33 | 1.0 |
| A | 185 | CA | B 183 | CA | 64.42 | 1.0 |

3D5S

Restraint Sets

|   |    |    |   |     |    |       |     |
|---|----|----|---|-----|----|-------|-----|
| A | 37 | CA | B | 24  | CA | 28.74 | 1.0 |
| A | 37 | CA | B | 50  | CA | 9.04  | 1.0 |
| A | 37 | CA | B | 215 | CA | 40.73 | 1.0 |
| A | 55 | CA | B | 24  | CA | 31.21 | 1.0 |
| A | 55 | CA | B | 50  | CA | 31.18 | 1.0 |
| A | 55 | CA | B | 215 | CA | 46.08 | 1.0 |
| A | 15 | CA | B | 24  | CA | 41.11 | 1.0 |
| A | 15 | CA | B | 50  | CA | 37.64 | 1.0 |
| A | 15 | CA | B | 215 | CA | 38.86 | 1.0 |
| A | 33 | CA | B | 24  | CA | 38.53 | 1.0 |
| A | 33 | CA | B | 50  | CA | 17.83 | 1.0 |
| A | 33 | CA | B | 215 | CA | 48.62 | 1.0 |

3SGQ

|   |    |    |   |     |    |       |     |
|---|----|----|---|-----|----|-------|-----|
| A | 29 | CA | B | 236 | CA | 39.84 | 1.0 |
| A | 29 | CA | B | 84  | CA | 30.92 | 1.0 |
| A | 29 | CA | B | 134 | CA | 34.9  | 1.0 |
| A | 22 | CA | B | 236 | CA | 31.99 | 1.0 |
| A | 22 | CA | B | 84  | CA | 22.36 | 1.0 |
| A | 22 | CA | B | 134 | CA | 32.89 | 1.0 |
| A | 9  | CA | B | 84  | CA | 38.01 | 1.0 |
| A | 9  | CA | B | 134 | CA | 37.81 | 1.0 |
| A | 9  | CA | B | 236 | CA | 36.87 | 1.0 |
| A | 15 | CA | B | 84  | CA | 31.25 | 1.0 |
| A | 15 | CA | B | 134 | CA | 22.42 | 1.0 |
| A | 15 | CA | B | 236 | CA | 25.76 | 1.0 |

4CPA

|   |    |    |   |     |    |       |     |
|---|----|----|---|-----|----|-------|-----|
| A | 17 | CA | B | 27  | CA | 52.88 | 1.0 |
| A | 17 | CA | B | 121 | CA | 33.4  | 1.0 |
| A | 17 | CA | B | 216 | CA | 30.76 | 1.0 |
| A | 22 | CA | B | 27  | CA | 44.02 | 1.0 |
| A | 22 | CA | B | 121 | CA | 20.14 | 1.0 |
| A | 22 | CA | B | 216 | CA | 35.01 | 1.0 |
| A | 30 | CA | B | 27  | CA | 45.44 | 1.0 |
| A | 30 | CA | B | 121 | CA | 34.35 | 1.0 |
| A | 30 | CA | B | 216 | CA | 19.13 | 1.0 |
| A | 2  | CA | B | 27  | CA | 50.79 | 1.0 |
| A | 2  | CA | B | 121 | CA | 24.59 | 1.0 |
| A | 2  | CA | B | 216 | CA | 44.09 | 1.0 |

7CEI

|   |     |    |   |    |    |       |     |
|---|-----|----|---|----|----|-------|-----|
| A | 493 | CA | B | 13 | CA | 38.51 | 1.0 |
| A | 493 | CA | B | 25 | CA | 20.32 | 1.0 |
| A | 493 | CA | B | 76 | CA | 41.25 | 1.0 |
| A | 508 | CA | B | 13 | CA | 34.3  | 1.0 |
| A | 508 | CA | B | 25 | CA | 25.89 | 1.0 |
| A | 508 | CA | B | 76 | CA | 35.28 | 1.0 |
| A | 531 | CA | B | 13 | CA | 26.26 | 1.0 |
| A | 531 | CA | B | 25 | CA | 18.75 | 1.0 |
| A | 531 | CA | B | 76 | CA | 19.59 | 1.0 |
| A | 573 | CA | B | 13 | CA | 45.36 | 1.0 |
| A | 573 | CA | B | 25 | CA | 31.15 | 1.0 |

Restraint Sets

A 573 CA B 76 CA 39.95 1.0

9QFW

A 44 CA B 224 CA 51.33 1.0  
 A 44 CA B 213 CA 72.1 1.0  
 A 44 CA B 73 CA 64.6 1.0  
 A 68 CA B 224 CA 32.01 1.0  
 A 68 CA B 213 CA 46.26 1.0  
 A 68 CA B 73 CA 29.78 1.0  
 A 102 CA B 73 CA 41.68 1.0  
 A 102 CA B 213 CA 60.64 1.0  
 A 102 CA B 224 CA 40.83 1.0  
 A 17 CA B 73 CA 22.87 1.0  
 A 17 CA B 213 CA 37.05 1.0  
 A 17 CA B 224 CA 21.35 1.0

BOYV

A 60 CA B 7 CA 48.76 1.0  
 A 60 CA B 18 CA 64.12 1.0  
 A 60 CA B 133 CA 49.84 1.0  
 A 3 CA B 7 CA 23.4 1.0  
 A 3 CA B 18 CA 35.8 1.0  
 A 3 CA B 133 CA 18.23 1.0  
 A 116 CA B 7 CA 37.61 1.0  
 A 116 CA B 18 CA 50.71 1.0  
 A 116 CA B 133 CA 18.5 1.0  
 A 86 CA B 7 CA 22.21 1.0  
 A 86 CA B 18 CA 37.89 1.0  
 A 86 CA B 133 CA 30.38 1.0



## Restraint Sets

:

:

## RMSD100 -XTAL

RMSD100 of the best scoring cluster with respect to the crystal structure.

| Structure | 6 restraints | 9 restraints | 12 restraints |
|-----------|--------------|--------------|---------------|
| 1AHW      | 5.52         | 2.14         | 1.51          |
| 1BVK      | 7.37         | 2.07         | 1.29          |
| 1DQJ      | 5.52         | 2.61         | 0.87          |
| 1E6J      | 2.72         | 1.71         | 0.84          |
| 1JPS      | 6.46         | 3.17         | 1.04          |
| 1MLC      | 6.48         | 4.29         | 0.80          |
| 1VFB      | 5.98         | 2.64         | 0.63          |
| 1WEJ      | 2.31         | 1.08         | 0.66          |
| 2FD6      | 6.17         | 5.79         | 1.46          |
| 2I25      | 6.26         | 1.41         | 0.86          |
| 2VIS      | 8.71         | 8.35         | 3.19          |
| 1BJ1      | 4.94         | 4.75         | 1.97          |
| 1FSK      | 5.77         | 5.08         | 0.56          |
| 1I9R      | 7.36         | 6.68         | 0.61          |
| 1IQD      | 5.71         | 5.74         | 0.54          |
| 1K4C      | 4.32         | 5.07         | 0.36          |
| 1KXQ      | 5.84         | 7.90         | 0.38          |
| 1NCA      | 7.76         | 5.97         | 0.30          |
| 1NSN      | 5.69         | 4.47         | 1.23          |
| 1QFW      | 7.84         | 6.44         | 0.83          |
| 2JEL      | 3.10         | 3.53         | 1.51          |
| 1AVX      | 4.84         | 3.41         | 0.51          |
| 1AY7      | 8.57         | 5.11         | 0.71          |
| 1BVN      | 6.08         | 6.25         | 0.38          |
| 1CGI      | 5.38         | 5.36         | 1.09          |
| 1CLV      | 3.67         | 5.11         | 0.36          |
| 1D6R      | 10.44        | 10.13        | 0.95          |
| 1DFJ      | 11.04        | 12.77        | 0.97          |
| 1E6E      | 4.34         | 2.08         | 1.01          |
| 1EAW      | 9.12         | 8.66         | 0.46          |
| 1EWY      | 4.20         | 1.36         | 0.86          |
| 1EZU      | 8.33         | 5.93         | 1.48          |
| 1F34      | 9.92         | 1.24         | 0.61          |
| 1FLE      | 3.63         | 3.16         | 1.08          |
| 1GL1      | 1.92         | 2.19         | 0.85          |
| 1GXD      | 11.30        | 11.71        | 10.37         |
| 1HIA      | 5.71         | 5.72         | 0.87          |
| 1JTG      | 8.41         | 10.24        | 1.62          |
| 1MAH      | 3.50         | 2.82         | 0.54          |
| 1N8O      | 5.40         | 3.95         | 0.70          |
| 1OC0      | 2.16         | 0.94         | 0.94          |
| 1OPH      | 6.80         | 6.90         | 0.86          |
| 1OYV      | 6.52         | 1.97         | 0.75          |
| 1PPE      | 9.79         | 9.72         | 0.38          |
| 1R0R      | 3.28         | 3.20         | 2.48          |
| 1TMQ      | 10.92        | 10.14        | 0.48          |
| 1UDI      | 4.97         | 1.26         | 0.61          |
| 1YVB      | 12.48        | 13.29        | 10.58         |
| 2ABZ      | 4.17         | 4.44         | 0.73          |
| 2B42      | 6.71         | 5.15         | 0.42          |

## RMSD100 -XTAL

|      |       |       |       |
|------|-------|-------|-------|
| 2J0T | 8.73  | 1.46  | 1.21  |
| 2MTA | 5.90  | 1.13  | 0.45  |
| 2O8V | 7.93  | 8.08  | 2.72  |
| 2OUL | 11.88 | 11.15 | 11.43 |
| 2PCC | 6.10  | 0.74  | 0.41  |
| 2SIC | 8.12  | 1.95  | 0.39  |
| 2SNI | 2.20  | 0.43  | 0.35  |
| 2UUY | 10.10 | 10.95 | 12.17 |
| 3SGQ | 8.99  | 8.20  | 0.54  |
| 4CPA | 2.34  | 1.45  | 0.74  |
| 7CEI | 9.81  | 1.43  | 1.23  |
| 1A2K | 9.99  | 10.93 | 0.89  |
| 1AK4 | 7.88  | 7.08  | 0.94  |
| 1AKJ | 8.04  | 5.21  | 1.38  |
| 1AZS | 12.04 | 11.46 | 4.98  |
| 1B6C | 3.95  | 2.73  | 1.16  |
| 1BUH | 4.04  | 1.82  | 1.03  |
| 1E96 | 7.85  | 3.62  | 0.58  |
| 1EFN | 5.05  | 0.90  | 0.84  |
| 1F51 | 5.86  | 4.43  | 0.73  |
| 1FC2 | 3.10  | 1.14  | 1.09  |
| 1FCC | 4.03  | 3.97  | 5.92  |
| 1FFW | 8.58  | 1.14  | 1.06  |
| 1FQJ | 12.03 | 8.96  | 0.56  |
| 1GCQ | 7.15  | 5.28  | 1.36  |
| 1GHQ | 6.11  | 5.02  | 1.68  |
| 1GLA | 5.13  | 0.96  | 0.51  |
| 1GPW | 10.72 | 1.64  | 1.57  |
| 1H9D | 7.96  | 9.56  | 1.17  |
| 1HCF | 8.05  | 6.53  | 1.00  |
| 1HE1 | 6.90  | 4.84  | 0.66  |
| 1I4D | 6.79  | 1.68  | 0.96  |
| 1J2J | 8.67  | 6.80  | 0.94  |
| 1JWH | 6.18  | 0.91  | 0.83  |
| 1K74 | 10.67 | 4.41  | 0.77  |
| 1KAC | 6.52  | 6.74  | 6.25  |
| 1KLU | 6.91  | 4.46  | 0.84  |
| 1KTZ | 5.41  | 2.54  | 1.42  |
| 1KXP | 9.47  | 8.40  | 1.07  |
| 1ML0 | 4.48  | 1.76  | 0.82  |
| 1OFU | 8.29  | 0.84  | 0.70  |
| 1PVH | 11.71 | 10.03 | 7.94  |
| 1QA9 | 8.48  | 6.03  | 0.82  |
| 1RLB | 4.18  | 3.08  | 0.62  |
| 1RV6 | 7.94  | 5.85  | 2.74  |
| 1S1Q | 6.51  | 5.68  | 2.05  |
| 1SBB | 9.41  | 4.59  | 0.59  |
| 1T6B | 5.40  | 4.08  | 0.73  |
| 1US7 | 11.39 | 8.79  | 0.61  |
| 1WDW | 4.47  | 0.59  | 0.59  |
| 1XD3 | 6.54  | 4.06  | 0.98  |
| 1XU1 | 6.84  | 7.97  | 0.83  |
| 1Z0K | 8.41  | 4.11  | 3.99  |

## RMSD100 -XTAL

|      |       |       |       |
|------|-------|-------|-------|
| 1Z5Y | 7.79  | 5.58  | 1.44  |
| 1ZHH | 8.98  | 9.40  | 1.96  |
| 1ZHI | 8.14  | 7.08  | 1.14  |
| 2A5T | 8.63  | 2.20  | 0.90  |
| 2A9K | 7.24  | 0.76  | 0.84  |
| 2AJF | 6.82  | 5.23  | 0.95  |
| 2AYO | 4.69  | 4.62  | 1.31  |
| 2B4J | 8.25  | 6.91  | 0.94  |
| 2BTF | 4.72  | 3.66  | 1.40  |
| 2FJU | 5.29  | 5.26  | 0.47  |
| 2G77 | 6.31  | 5.64  | 1.22  |
| 2HLE | 9.22  | 8.90  | 1.13  |
| 2HQS | 12.90 | 13.18 | 12.85 |
| 2OOB | 9.05  | 6.46  | 1.03  |
| 2OOR | 11.72 | 10.37 | 1.04  |
| 2VDB | 2.70  | 2.63  | 1.15  |
| 3BP8 | 2.97  | 3.00  | 1.56  |
| 3D5S | 6.37  | 4.22  | 4.18  |
| 9QFW | 7.07  | 7.89  | 1.52  |
| 1BGX | 12.64 | 2.72  | 0.84  |
| 1ACB | 8.72  | 11.52 | 1.21  |
| 1IJK | 5.37  | 2.81  | 0.97  |
| 1JIW | 7.33  | 8.15  | 0.72  |
| 1KKL | 7.08  | 2.90  | 1.72  |
| 1M10 | 9.55  | 2.90  | 1.03  |
| 1NW9 | 10.65 | 8.16  | 8.44  |
| 1GP2 | 9.82  | 3.49  | 1.44  |
| 1GRN | 11.53 | 10.82 | 10.49 |
| 1HE8 | 5.35  | 4.22  | 0.72  |
| 1I2M | 9.23  | 1.33  | 1.56  |
| 1IB1 | 6.36  | 5.90  | 1.98  |
| 1K5D | 11.87 | 12.13 | 5.67  |
| 1LFD | 7.61  | 6.70  | 0.99  |
| 1MQ8 | 4.80  | 2.24  | 2.00  |
| 1N2C | 7.99  | 7.25  | 0.88  |
| 1R6Q | 7.92  | 9.00  | 1.55  |
| 1SYX | 6.11  | 5.96  | 5.40  |
| 1WQ1 | 5.10  | 1.75  | 0.71  |
| 1XQS | 6.13  | 3.09  | 1.46  |
| 1ZM4 | 10.39 | 9.53  | 1.08  |
| 2CFH | 5.72  | 4.22  | 3.23  |
| 2H7V | 7.60  | 4.60  | 1.31  |
| 2HRK | 6.98  | 0.79  | 0.78  |
| 2J7P | 9.17  | 5.71  | 1.53  |
| 2NZ8 | 11.75 | 2.92  | 1.39  |
| 2OZA | 11.92 | 10.98 | 1.20  |
| 2Z0E | 7.28  | 7.26  | 1.84  |
| BOYV | 4.89  | 3.18  | 2.02  |
| 3CPH | 6.94  | 2.88  | 0.94  |
| 1E4K | 7.61  | 6.74  | 6.02  |
| 2HMI | 6.57  | 5.82  | 2.49  |
| 1F6M | 8.31  | 8.89  | 4.82  |
| 1FQ1 | 7.65  | 2.17  | 1.73  |

## RMSD100 -XTAL

|      |       |       |       |
|------|-------|-------|-------|
| 1PXV | 9.19  | 7.86  | 1.56  |
| 1ZLI | 7.73  | 2.25  | 2.00  |
| 2O3B | 7.64  | 7.79  | 8.22  |
| 1ATN | 7.15  | 4.87  | 1.38  |
| 1BKD | 7.82  | 7.97  | 2.98  |
| 1DE4 | 10.39 | 9.69  | 1.19  |
| 1EER | 7.41  | 6.51  | 2.06  |
| 1FAK | 10.99 | 11.46 | 10.81 |
| 1H1V | 10.11 | 5.27  | 5.50  |
| 1IBR | 10.08 | 6.10  | 1.88  |
| 1IRA | 14.11 | 13.96 | 15.41 |
| 1JK9 | 7.07  | 3.41  | 2.26  |
| 1JMO | 8.61  | 8.03  | 2.28  |
| 1JZD | 2.40  | 3.17  | 1.68  |
| 1R8S | 10.53 | 10.38 | 2.02  |
| 1Y64 | 12.12 | 8.54  | 8.83  |
| 2C0L | 6.53  | 10.33 | 8.96  |
| 2I9B | 7.52  | 7.85  | 2.28  |
| 2IDO | 9.01  | 7.65  | 2.37  |
| 2OT3 | 11.51 | 7.19  | 1.49  |

## RMSD100 - MEAN

RMSD100 of the best scoring cluster with respect to the mean

| Structure | 6 restraints | 9 restraints | 12 restraints |
|-----------|--------------|--------------|---------------|
| 1AHW      | 5.26         | 1.98         | 1.29          |
| 1BVK      | 5.17         | 1.86         | 0.08          |
| 1DQJ      | 4.17         | 2.13         | 0.61          |
| 1E6J      | 1.60         | 0.92         | 0.31          |
| 1JPS      | 4.33         | 2.62         | 0.80          |
| 1MLC      | 5.55         | 4.03         | 0.47          |
| 1VFB      | 4.64         | 2.48         | 0.39          |
| 1WEJ      | 1.73         | 0.93         | 0.45          |
| 2FD6      | 5.21         | 3.93         | 0.18          |
| 2I25      | 6.06         | 0.59         | 0.48          |
| 2VIS      | 6.56         | 4.49         | 0.11          |
| 1BJ1      | 3.55         | 3.24         | 1.76          |
| 1FSK      | 4.03         | 3.62         | 0.51          |
| 1I9R      | 5.82         | 5.30         | 0.22          |
| 1IQD      | 4.38         | 3.38         | 0.50          |
| 1K4C      | 3.87         | 4.39         | 0.24          |
| 1KXQ      | 4.77         | 6.28         | 0.23          |
| 1NCA      | 5.91         | 4.98         | 0.28          |
| 1NSN      | 4.13         | 2.94         | 1.11          |
| 1QFW      | 4.79         | 4.80         | 0.29          |
| 2JEL      | 2.87         | 3.32         | 1.49          |
| 1AVX      | 4.14         | 3.18         | 0.28          |
| 1AY7      | 6.02         | 4.54         | 0.53          |
| 1BVN      | 2.90         | 2.88         | 0.18          |
| 1CGI      | 4.09         | 4.67         | 0.18          |
| 1CLV      | 3.07         | 0.73         | 0.16          |
| 1D6R      | 2.57         | 1.42         | 0.25          |
| 1DFJ      | 6.42         | 0.23         | 0.19          |
| 1E6E      | 3.14         | 1.22         | 0.08          |
| 1EAW      | 7.87         | 6.66         | 0.22          |
| 1EWY      | 2.03         | 0.81         | 0.58          |
| 1EZU      | 4.88         | 1.98         | 0.10          |
| 1F34      | 6.73         | 0.87         | 0.17          |
| 1FLE      | 2.25         | 0.37         | 0.11          |
| 1GL1      | 1.44         | 1.84         | 0.26          |
| 1GXD      | 3.77         | 3.07         | 0.08          |
| 1HIA      | 3.83         | 3.96         | 0.21          |
| 1JTG      | 5.00         | 1.05         | 0.21          |
| 1MAH      | 2.19         | 1.42         | 0.33          |
| 1N8O      | 4.56         | 2.15         | 0.22          |
| 1OC0      | 1.69         | 0.09         | 0.08          |
| 1OPH      | 3.81         | 2.04         | 0.32          |
| 1OYV      | 4.18         | 1.80         | 0.61          |
| 1PPE      | 1.72         | 0.29         | 0.19          |
| 1R0R      | 2.32         | 2.21         | 2.03          |
| 1TMQ      | 4.06         | 3.72         | 0.21          |
| 1UDI      | 3.23         | 1.02         | 0.29          |
| 1YVB      | 4.11         | 1.13         | 0.29          |
| 2ABZ      | 2.84         | 2.32         | 0.38          |
| 2B42      | 5.21         | 3.66         | 0.17          |

RMSD100 - MEAN

|      |      |      |      |
|------|------|------|------|
| 2J0T | 5.82 | 0.28 | 0.03 |
| 2MTA | 4.91 | 1.01 | 0.21 |
| 2O8V | 5.22 | 5.35 | 0.38 |
| 2OUL | 3.30 | 0.47 | 4.63 |
| 2PCC | 3.84 | 0.69 | 0.26 |
| 2SIC | 5.65 | 1.77 | 0.27 |
| 2SNI | 1.92 | 0.36 | 0.25 |
| 2UUY | 7.23 | 5.88 | 4.20 |
| 3SGQ | 4.98 | 6.29 | 0.28 |
| 4CPA | 1.48 | 0.85 | 0.36 |
| 7CEI | 6.22 | 0.86 | 0.43 |
| 1A2K | 7.35 | 5.32 | 0.10 |
| 1AK4 | 4.55 | 4.95 | 0.39 |
| 1AKJ | 4.59 | 4.44 | 0.08 |
| 1AZS | 7.08 | 6.63 | 0.19 |
| 1B6C | 3.01 | 1.73 | 0.12 |
| 1BUH | 3.12 | 1.32 | 0.32 |
| 1E96 | 5.88 | 3.40 | 0.33 |
| 1EFN | 4.07 | 0.68 | 0.56 |
| 1F51 | 3.35 | 3.31 | 0.23 |
| 1FC2 | 2.58 | 0.32 | 0.18 |
| 1FCC | 2.78 | 2.68 | 0.10 |
| 1FFW | 7.34 | 0.43 | 0.32 |
| 1FQJ | 8.91 | 6.03 | 0.11 |
| 1GCQ | 6.36 | 4.73 | 0.79 |
| 1GHQ | 2.91 | 3.59 | 0.09 |
| 1GLA | 4.07 | 0.89 | 0.28 |
| 1GPW | 7.83 | 0.38 | 0.21 |
| 1H9D | 5.77 | 6.35 | 0.24 |
| 1HCF | 5.79 | 5.00 | 0.34 |
| 1HE1 | 4.90 | 3.71 | 0.30 |
| 1I4D | 4.08 | 1.52 | 0.03 |
| 1J2J | 6.83 | 5.58 | 0.19 |
| 1JWH | 4.45 | 0.30 | 0.24 |
| 1K74 | 7.49 | 4.19 | 0.21 |
| 1KAC | 3.11 | 0.14 | 3.64 |
| 1KLU | 4.34 | 3.87 | 0.06 |
| 1KTZ | 4.25 | 2.09 | 0.43 |
| 1KXP | 6.47 | 5.39 | 0.07 |
| 1ML0 | 3.01 | 1.46 | 0.11 |
| 1OFU | 5.70 | 0.53 | 0.33 |
| 1PVH | 6.05 | 2.94 | 0.09 |
| 1QA9 | 7.18 | 4.17 | 0.46 |
| 1RLB | 3.33 | 2.52 | 0.39 |
| 1RV6 | 3.51 | 2.78 | 0.19 |
| 1S1Q | 4.64 | 2.85 | 1.38 |
| 1SBB | 7.13 | 4.11 | 0.36 |
| 1T6B | 4.02 | 3.68 | 0.17 |
| 1US7 | 8.29 | 6.31 | 0.21 |
| 1WDW | 2.59 | 0.23 | 0.22 |
| 1XD3 | 4.85 | 3.64 | 0.28 |
| 1XU1 | 4.13 | 3.25 | 0.10 |
| 1Z0K | 4.71 | 0.13 | 0.15 |

## RMSD100 - MEAN

|      |       |      |      |
|------|-------|------|------|
| 1Z5Y | 6.06  | 4.42 | 0.05 |
| 1ZHH | 6.64  | 5.41 | 0.15 |
| 1ZHI | 4.71  | 4.38 | 0.12 |
| 2A5T | 6.41  | 2.08 | 0.46 |
| 2A9K | 6.10  | 0.37 | 0.20 |
| 2AJF | 5.36  | 4.59 | 0.10 |
| 2AYO | 2.33  | 1.47 | 0.10 |
| 2B4J | 5.27  | 5.52 | 0.09 |
| 2BTF | 3.47  | 2.08 | 0.36 |
| 2FJU | 3.66  | 3.40 | 0.06 |
| 2G77 | 4.66  | 3.74 | 0.04 |
| 2HLE | 6.08  | 5.52 | 0.30 |
| 2HQS | 1.75  | 1.25 | 0.15 |
| 2OOB | 5.50  | 4.17 | 0.53 |
| 2OOR | 5.79  | 5.64 | 0.09 |
| 2VDB | 2.05  | 1.94 | 0.06 |
| 3BP8 | 1.97  | 1.70 | 0.15 |
| 3D5S | 4.05  | 0.64 | 0.08 |
| 9QFW | 4.67  | 3.10 | 0.14 |
| 1BGX | 10.49 | 2.54 | 0.28 |
| 1ACB | 6.94  | 5.73 | 0.10 |
| 1IJK | 3.95  | 2.48 | 0.79 |
| 1JIW | 5.82  | 5.62 | 0.24 |
| 1KKL | 5.55  | 2.46 | 0.20 |
| 1M10 | 5.64  | 2.37 | 0.31 |
| 1NW9 | 6.34  | 0.72 | 0.48 |
| 1GP2 | 7.63  | 1.54 | 0.03 |
| 1GRN | 5.12  | 2.39 | 0.10 |
| 1HE8 | 3.70  | 3.28 | 0.20 |
| 1I2M | 5.93  | 0.09 | 0.61 |
| 1IB1 | 3.76  | 0.62 | 0.91 |
| 1K5D | 8.81  | 5.77 | 1.39 |
| 1LFD | 6.34  | 4.46 | 0.29 |
| 1MQ8 | 3.29  | 1.71 | 0.32 |
| 1N2C | 5.33  | 3.88 | 0.25 |
| 1R6Q | 6.02  | 3.79 | 0.17 |
| 1SYX | 3.63  | 0.42 | 0.50 |
| 1WQ1 | 1.66  | 1.59 | 0.24 |
| 1XQS | 4.67  | 2.54 | 0.03 |
| 1ZM4 | 4.11  | 3.46 | 0.09 |
| 2CFH | 4.60  | 2.29 | 0.05 |
| 2H7V | 5.65  | 3.25 | 0.03 |
| 2HRK | 4.35  | 0.28 | 0.29 |
| 2J7P | 6.08  | 3.72 | 0.04 |
| 2NZ8 | 6.45  | 2.14 | 0.11 |
| 2OZA | 7.95  | 7.86 | 0.11 |
| 2Z0E | 5.26  | 3.76 | 0.22 |
| BOYV | 3.86  | 2.35 | 1.05 |
| 3CPH | 4.37  | 2.29 | 0.02 |
| 1E4K | 5.36  | 3.46 | 2.29 |
| 2HMI | 3.91  | 4.03 | 0.23 |
| 1F6M | 5.00  | 3.01 | 0.19 |
| 1FQ1 | 6.47  | 1.51 | 0.04 |



## RMSD100 - MEAN

|      |      |      |      |
|------|------|------|------|
| 1PXV | 6.15 | 5.26 | 0.74 |
| 1ZLI | 4.31 | 0.93 | 0.10 |
| 2O3B | 5.33 | 0.09 | 0.21 |
| 1ATN | 4.67 | 3.67 | 0.21 |
| 1BKD | 3.17 | 3.35 | 0.15 |
| 1DE4 | 7.30 | 6.17 | 0.01 |
| 1EER | 3.58 | 0.06 | 0.11 |
| 1FAK | 6.34 | 5.78 | 2.55 |
| 1H1V | 5.60 | 0.07 | 0.20 |
| 1IBR | 4.59 | 2.94 | 0.07 |
| 1IRA | 6.49 | 6.70 | 0.47 |
| 1JK9 | 5.53 | 2.69 | 0.15 |
| 1JMO | 4.16 | 3.38 | 0.13 |
| 1JZD | 1.41 | 1.84 | 0.04 |
| 1R8S | 7.08 | 5.02 | 0.10 |
| 1Y64 | 7.55 | 3.53 | 0.09 |
| 2C0L | 6.53 | 5.43 | 0.24 |
| 2I9B | 5.55 | 5.26 | 0.07 |
| 2IDO | 6.11 | 4.15 | 0.16 |
| 2OT3 | 6.28 | 5.68 | 0.04 |
